# Supplementary material
Source: PubMed Central journal article supplement (PMC3413166)
Supplement: supp_139.17.3232_DEV077107TableS1.pdf [file supp_139.17.3232_DEV077107TableS1.pdf]

| <b>Primer</b>                       | <b>Sequence (5'-3')</b>    |
|-------------------------------------|----------------------------|
| tp53 forward primer (genotyping)    | GATAGCCTAGTGCGAGCACACTCTT  |
| WTtp53 reverse primer (genotyping)  | AGCTGCATGGGGGGGAT          |
| zdf1p53 reverse primer (genotyping) | AGCTGCATGGGGGGGAA          |
| Sbds <sup>Spl</sup> exon 2 forward  | CCAACACAGTCTTTGTGAATG      |
| Sbds <sup>Spl</sup> exon 3 reverse  | CGCTTGGTCTCAGGATTC         |
| p53 <sup>Spl</sup> exon 5 forward   | CACCGGACCTGAATAAACTCTTC,   |
| p53 <sup>Spl</sup> exon 6 reverse   | CCCTGTAATTTGCTCGCTG        |
| Beta-actin qPCR forward             | CCCAGACATCAGGGAGTGAT       |
| Beta-actin qPCR reverse             | TCTCTGTTGGCTTTGGGATT       |
| p53 qPCR forward                    | CTCTCCCACCAACATCCACT       |
| p53 qPCR reverse                    | ACGTCCACCACCATTTGAAC       |
| ΔN113p53 qPCR forward               | ATATCCTGGCGAACATTTGG       |
| ΔN113p53 qPCR reverse               | ACGTCCACCACCATTTGAAC       |
| p21 qPCR forward                    | CGGAATAAACGGTGTCTGTCT      |
| p21 qPCR reverse                    | CGCAAACAGACCAACATCAC       |
| Sbds in situ probe forward          | GGGAAAAGATTTGAAATCGCCTG    |
| Sbds in situ probe reverse          | CCGAAAACAGCCTGGATC         |
| rpl3 in situ probe forward          | GGCTGGCATGACCCACATAG       |
| rpl3 in situ probe reverse          | GGACTGCTCAAGCTTCTCTCTGGC   |
| pescadillo in situ probe forward    | ATGGGCGGATTACAAAAGAAG      |
| pescadillo in situ probe reverse    | CATCCACTCAACACTGAGTC       |
| Spi1 in situ probe forward          | ATGGAGGGGTACATCATCC        |
| Spi1 in situ probe reverse          | GTATGTCATCTGTGGAGTGG       |
| mpo in situ probe forward           | GTGGTGGGCTGCTGTTGTG        |
| mpo in situ probe reverse           | CCTACAAGATGGTGGCCGGG       |
| <b>Morpholino</b>                   | <b>Sequence</b>            |
| Sbds <sup>ATG</sup> MO              | TTAGTTGGCGTGAATATTGACATG   |
| Sbds <sup>Spl</sup> MO              | GCTTTGACCATTACAGATCACCTGTT |
| p53 <sup>ATG</sup> MO               | GeneTools                  |
| p53 <sup>Spl</sup> MO               | AAAATGTCTGTACTATCTCCATCCG  |
| Rpl3 <sup>ATG</sup> MO              | GGCCGAAAATTTACGGTGAGACATT  |
| Pes <sup>ATG</sup> MO               | ACTTCTTCTTTTGTAAATCCGCCCAT |
