# Supplementary material
Source: PubMed Central journal article supplement (PMC3413166)
Supplement: supp_139.17.3232_DEV077107TableS2.pdf [file supp_139.17.3232_DEV077107TableS2.pdf]

| <b><i>P</i>-value cut-off</b> | <b>Sbds<sup>ATG</sup> MO-injected embryos versus control embryos</b> |                   |                     | <b>Sbds<sup>ATG</sup>/p53<sup>ATG</sup> MO-injected embryos versus p53<sup>ATG</sup> MO-injected embryos</b> |                   |                     |
|-------------------------------|----------------------------------------------------------------------|-------------------|---------------------|--------------------------------------------------------------------------------------------------------------|-------------------|---------------------|
|                               | Differentially expressed genes                                       | Upregulated genes | Downregulated genes | Differentially expressed genes                                                                               | Upregulated genes | Downregulated genes |
| 0.05                          | 7056                                                                 | 3748              | 3308                | 2888                                                                                                         | 1564              | 1324                |
| 0.01                          | 4251                                                                 | 2214              | 2037                | 931                                                                                                          | 514               | 417                 |
| 0.001                         | 1875                                                                 | 898               | 977                 | 210                                                                                                          | 127               | 83                  |
