# Supplementary material
Source: PubMed Central journal article supplement (PMC3413166)
Supplement: supp_139.17.3232_DEV077107TableS3.pdf [file supp_139.17.3232_DEV077107TableS3.pdf]

| Probe        | ZFIN ID              | Fold change | P-value | Gene               | Description                                                                     |
|--------------|----------------------|-------------|---------|--------------------|---------------------------------------------------------------------------------|
| A_15_P480345 | ZDB-GENE-080515-2    | 2.375       | 0.001   | arrdc1b            | arrestin domain containing 1b                                                   |
| A_15_P143036 | ZDB-GENE-041210-42   | 0.708       | 0.014   | mcm10              | minichromosome maintenance complex component 10                                 |
| A_15_P269706 | NA                   | 0.572       | 0.025   | LOC100006405       | hypothetical LOC100006405                                                       |
| A_15_P284426 | NA                   | 0.583       | 0.011   | LOC565910          | Creb5b-like                                                                     |
| A_15_P733065 | ZDB-GENE-030131-8681 | 0.471       | 0.001   | ptmab              | prothymosin, alpha b                                                            |
| A_15_P140446 | ZDB-GENE-061110-76   | 1.549       | 0.039   | fam160b2           | family with sequence similarity 160, member B2                                  |
| A_15_P671196 | ZDB-GENE-050522-346  | 1.934       | 0.028   | calcoco2           | calcium binding and coiled-coil domain 2                                        |
| A_15_P183816 | ZDB-GENE-030131-3630 | 1.473       | 0.045   | si:ch211-210c8.6   | si:ch211-210c8.6                                                                |
| A_15_P120698 | ZDB-GENE-050809-4    | 1.386       | 0.026   | zgc:163093         | zgc:163093                                                                      |
| A_15_P168751 | ZDB-GENE-041014-332  | 1.431       | 0.02    | si:ch211-260g14.3  | si:ch211-260g14.3                                                               |
| A_15_P392240 | NA                   | 24.001      | 0       | ENSDART00000112698 | hypothetical protein LOC100329403                                               |
| A_15_P101775 | ZDB-GENE-040426-1938 | 0.696       | 0.015   | zgc:56141          | RNA binding motif protein 4.3                                                   |
| A_15_P139766 | ZDB-GENE-070705-339  | 1.418       | 0.05    | snx18a             | sorting nexin 18a                                                               |
| A_15_P626836 | ZDB-GENE-990415-161  | 0.698       | 0.041   | spon2b             | spondin 2b, extracellular matrix protein                                        |
| A_15_P222981 | ZDB-GENE-000511-6    | 2.867       | 0       | baxa               | bcl2-associated X protein, a                                                    |
| A_15_P170846 | ZDB-GENE-040625-181  | 1.411       | 0.017   | zgc:86598          | zgc:86598                                                                       |
| A_15_P169106 | ZDB-GENE-040426-2230 | 1.849       | 0.002   | slc37a4a           | solute carrier family 37 (glucose-6-phosphate transporter), member 4a           |
| A_15_P689426 | ZDB-GENE-071126-1    | 0.595       | 0.025   | lrrn1              | leucine rich repeat neuronal 1                                                  |
| A_15_P100107 | ZDB-GENE-040426-2814 | 0.679       | 0.047   | zgc:55262          | zgc:55262                                                                       |
| A_15_P622736 | ZDB-GENE-030616-591  | 1.462       | 0.023   | dhrrs1             | dehydrogenase/reductase (SDR family) member 1                                   |
| A_15_P114333 | ZDB-GENE-031002-1    | 0.369       | 0.002   | hsp90b1            | heat shock protein 90, beta (grp94), member 1                                   |
| A_15_P711091 | ZDB-GENE-031118-30   | 1.435       | 0.037   | rab5c              | RAB5C, member RAS oncogene family                                               |
| A_15_P755511 | ZDB-GENE-030131-614  | 1.519       | 0.025   | smndc1             | survival motor neuron domain containing 1                                       |
| A_15_P137766 | ZDB-GENE-050208-330  | 1.593       | 0.032   | si:dkey-253d23.3   | si:dkey-253d23.3                                                                |
| A_15_P656531 | ZDB-GENE-040426-1933 | 0.524       | 0.026   | sema6d             | sema domain, transmembrane domain (TM), and cytoplasmic domain, (semaphorin) 6D |
| A_15_P143766 | NA                   | 1.724       | 0.002   | BI318623           | mCG19967-like                                                                   |
| A_15_P107387 | ZDB-GENE-041210-109  | 1.734       | 0.004   | mrps18a            | mitochondrial ribosomal protein S18A                                            |
| A_15_P368580 | ZDB-GENE-050506-148  | 1.47        | 0.043   | ENSDART00000050644 | im:7148243                                                                      |

|              |                      |       |       |                  |                                                                         |
|--------------|----------------------|-------|-------|------------------|-------------------------------------------------------------------------|
| A_15_P120737 | ZDB-GENE-030131-5881 | 1.45  | 0.023 | poldip2          | polymerase (DNA-directed), delta interacting protein 2                  |
| A_15_P173761 | ZDB-GENE-030131-970  | 1.464 | 0.026 | rpl71l           | ribosomal protein L7-like 1                                             |
| A_15_P737626 | ZDB-GENE-030131-3507 | 1.341 | 0.044 | pap0lb           | poly(A) polymerase beta (testis specific)                               |
| A_15_P261706 | NA                   | 0.514 | 0.048 | TC406091         | CXXC finger 4-like                                                      |
| A_15_P172071 | ZDB-GENE-050522-156  | 1.545 | 0.04  | zgc:109967       | zgc:109967                                                              |
| A_15_P628331 | ZDB-GENE-030131-5982 | 1.708 | 0.002 | gtpbp4           | GTP binding protein 4                                                   |
| A_15_P320756 | ZDB-GENE-040426-1949 | 0.724 | 0.029 | slc37a2          | solute carrier family 37 (glycerol-3-phosphate transporter), member 2   |
| A_15_P372115 | ZDB-GENE-040426-1624 | 2.414 | 0     | TC377963         | PUF (Pumilio/FBF) domain-containing A                                   |
| A_15_P621466 | ZDB-GENE-060929-172  | 0.474 | 0.004 | zgc:154018       | zgc:154018                                                              |
| A_15_P703911 | ZDB-GENE-030131-527  | 1.361 | 0.029 | calm3b           | calmodulin 3b (phosphorylase kinase, delta)                             |
| A_15_P116563 | ZDB-GENE-030616-622  | 1.39  | 0.034 | adam8a           | a disintegrin and metalloproteinase domain 8a                           |
| A_15_P132436 | ZDB-GENE-010111-1    | 0.619 | 0.007 | sox19b           | SRY-box containing gene 19b                                             |
| A_15_P566822 | ZDB-GENE-090311-51   | 1.944 | 0.001 | zgc:153462       | si:dkeyp-27c8.2                                                         |
| A_15_P259981 | ZDB-GENE-041010-17   | 0.556 | 0.005 | zgc:103681       | zgc:103681                                                              |
| A_15_P624806 | ZDB-GENE-070112-1022 | 1.996 | 0     | zgc:158741       | zgc:158741                                                              |
| A_15_P121217 | ZDB-GENE-030131-9123 | 5.16  | 0     | mmp2             | matrix metalloproteinase 2                                              |
| A_15_P721146 | ZDB-GENE-040426-1303 | 1.37  | 0.029 | zgc:63938        | zgc:63938                                                               |
| A_15_P281691 | ZDB-GENE-040116-2    | 1.399 | 0.048 | pafah1b1a        | platelet-activating factor acetylhydrolase, isoform Ib, alpha subunit a |
| A_15_P241676 | ZDB-GENE-060119-1    | 1.461 | 0.029 | lama2            | laminin, alpha 2                                                        |
| A_15_P722226 | ZDB-GENE-030131-6070 | 0.554 | 0.004 | nipblb           | nipped-b homolog b (Drosophila)                                         |
| A_15_P722591 | ZDB-GENE-030131-6132 | 2.139 | 0.001 | ifrd1            | interferon-related developmental regulator 1                            |
| A_15_P623686 | ZDB-GENE-000330-8    | 1.583 | 0.004 | coil             | coilin p80                                                              |
| A_15_P549762 | ZDB-GENE-050208-451  | 0.459 | 0.006 | LOC563738        | similar to Fetuin-B precursor (IRL685), si:ch211-284e20.8               |
| A_15_P719606 | ZDB-GENE-030131-5457 | 1.349 | 0.033 | dup7             | dual specificity phosphatase 7                                          |
| A_15_P445630 | ZDB-GENE-040822-44   | 1.58  | 0.01  | flad1            | FAD1 flavin adenine dinucleotide synthetase homolog (S. cerevisiae)     |
| A_15_P632221 | ZDB-GENE-980526-135  | 1.772 | 0.046 | ihhb             | Indian hedgehog homolog b                                               |
| A_15_P161116 | ZDB-GENE-030131-4076 | 1.775 | 0.002 | pdc11            | programmed cell death 11                                                |
| A_15_P757566 | ZDB-GENE-061013-772  | 0.537 | 0.001 | zgc:152941       | zgc:152941                                                              |
| A_15_P168581 | ZDB-GENE-030131-8720 | 1.779 | 0.01  | si:ch211-272f3.3 | si:ch211-272f3.3                                                        |
| A_15_P747641 | ZDB-GENE-050104-1    | 1.489 | 0.011 | perp             | PERP, TP53 apoptosis effector                                           |

|              |                                                                   |       |       |                    |                                                         |
|--------------|-------------------------------------------------------------------|-------|-------|--------------------|---------------------------------------------------------|
| A_15_P152656 | ZDB-GENE-030131-4505                                              | 1.391 | 0.03  | dhx37              | DEAH (Asp-Glu-Ala-His) box polypeptide 37               |
| A_15_P136346 | ZDB-GENE-030131-6081                                              | 2.018 | 0.001 | si:dkey-44k1.3     | si:dkey-44k1.3                                          |
| A_15_P632166 | ZDB-GENE-030131-9662                                              | 1.321 | 0.037 | rap1b              | RAS related protein 1b                                  |
| A_15_P172766 | ZDB-GENE-030131-5627                                              | 1.45  | 0.022 | si:ch211-105d11.2  | si:ch211-105d11.2                                       |
| A_15_P371610 | NA                                                                | 0.657 | 0.041 | TC380829           | hypothetical LOC568650                                  |
| A_15_P577577 | NA                                                                | 0.276 | 0.001 | TC401263           | hypothetical LOC100006029                               |
| A_15_P156076 | ZDB-GENE-040801-86                                                | 2.143 | 0     | zgc:101084         | zgc:101084                                              |
| A_15_P703926 | ZDB-GENE-061103-307                                               | 1.45  | 0.042 | zgc:154007         | zgc:154007                                              |
| A_15_P620656 | ZDB-GENE-030131-6031                                              | 1.31  | 0.04  | naa15b             | N(alpha)-acetyltransferase 15, NatA auxiliary subunit b |
| A_15_P625331 | ZDB-GENE-030131-8525                                              | 2.146 | 0.002 | tysnd1             | trypsin domain containing 1                             |
| A_15_P155101 | NA                                                                | 0.597 | 0.023 | ENSDART00000074325 | dual specificity phosphatase 10-like                    |
| A_15_P106233 | ZDB-GENE-050327-30                                                | 0.574 | 0.02  | zgc:113358         | zgc:113358                                              |
| A_15_P139966 | ZDB-GENE-040426-1662                                              | 0.484 | 0.002 | rlbp1a             | retinaldehyde binding protein 1a                        |
| A_15_P207001 | ZDB-GENE-040426-1521                                              | 0.5   | 0.041 | stc1               | stanniocalcin 1                                         |
| A_15_P727831 | ZDB-GENE-040912-53                                                | 1.59  | 0.007 | zgc:101748         | zgc:101748                                              |
| A_15_P161561 | ZDB-GENE-040426-1805                                              | 1.44  | 0.04  | zgc:77221          | zgc:77221                                               |
| A_15_P664306 | ZDB-GENE-070220-1                                                 | 0.669 | 0.029 | brd2b              | bromodomain containing 2b                               |
| A_15_P191901 | ZDB-GENE-030131-4075                                              | 1.394 | 0.036 | ENSDART00000023820 | si:ch211-255d18.1                                       |
| A_15_P582767 | ZDB-GENE-030131-298                                               | 0.542 | 0.003 | si:ch211-81a5.7    | si:ch211-81a5.7                                         |
| A_15_P120095 | ZDB-GENE-041114-126                                               | 1.419 | 0.039 | bin2a              | bridging integrator 2a                                  |
| A_15_P624951 | ZDB-GENE-070822-15,<br>ZDB-GENE-080220-41,<br>ZDB-GENE-041014-235 | 1.54  | 0.037 | zgc:171670         | zgc:171670, zgc:171818, si:dkey-24117.6                 |
| A_15_P224141 | ZDB-GENE-061215-116                                               | 0.693 | 0.028 | zgc:158403         | zgc:158403                                              |
| A_15_P108853 | ZDB-GENE-040801-188                                               | 0.509 | 0.01  | dup2               | dual specificity phosphatase 2                          |
| A_15_P364065 | ZDB-GENE-021220-2                                                 | 1.409 | 0.041 | ddx54              | DEAD (Asp-Glu-Ala-Asp) box polypeptide 54               |
| A_15_P206371 | ZDB-GENE-050809-128                                               | 1.668 | 0.007 | zgc:110294         | zgc:110294                                              |
| A_15_P770471 | NA                                                                | 0.489 | 0.044 | TC412214           | proteinase inhibitor-like                               |
| A_15_P214106 | ZDB-GENE-021016-1                                                 | 0.498 | 0.004 | ccng2              | cyclin G2                                               |
| A_15_P443275 | ZDB-GENE-090313-247                                               | 1.452 | 0.013 | ENSDART00000101279 | si:dkey-221j11.3                                        |
| A_15_P471675 | ZDB-GENE-070615-6                                                 | 2.122 | 0.001 | zgc:162873         | MON1 homolog A (yeast)                                  |

|              |                                                                      |       |       |                   |                                                              |
|--------------|----------------------------------------------------------------------|-------|-------|-------------------|--------------------------------------------------------------|
| A_15_P741706 | ZDB-GENE-030131-7647                                                 | 0.644 | 0.003 | ptmaa             | prothymosin, alpha a                                         |
| A_15_P600292 | ZDB-GENE-030131-5553                                                 | 0.433 | 0.002 | cbx5              | chromobox homolog 5 (HP1 alpha homolog, Drosophila)          |
| A_15_P109117 | ZDB-GENE-040426-1997                                                 | 1.393 | 0.047 | cstf3             | cleavage stimulation factor, 3' pre-RNA, subunit 3           |
| A_15_P225441 | ZDB-GENE-010130-1                                                    | 0.772 | 0.042 | ctbp1             | C-terminal binding protein 1                                 |
| A_15_P104241 | ZDB-GENE-030131-6154                                                 | 1.898 | 0.01  | hnmpa0            | heterogeneous nuclear ribonucleoprotein A0                   |
| A_15_P108572 | ZDB-GENE-051030-24                                                   | 0.713 | 0.02  | zgc:123019        | zgc:123019                                                   |
| A_15_P184701 | ZDB-GENE-041014-208,<br>ZDB-GENE-030131-6182,<br>ZDB-GENE-070424-268 | 1.737 | 0.036 | si:ch211-171o19.1 | si:ch211-171o19.1, si:dkey-14a7.4, si:dkeyp-110e4.3          |
| A_15_P579312 | ZDB-GENE-030131-5479                                                 | 0.628 | 0.02  | sec23b            | Sec23 homolog B (S. cerevisiae)                              |
| A_15_P109813 | ZDB-GENE-040426-1709                                                 | 2.035 | 0.001 | smfn              | small fragment nuclease                                      |
| A_15_P154911 | NA                                                                   | 1.83  | 0.036 | NP13316257        | sodium/potassium/calcium exchanger 1-like                    |
| A_15_P734841 | ZDB-GENE-980526-39                                                   | 0.568 | 0.01  | cahz              | carbonic anhydrase                                           |
| A_15_P118499 | ZDB-GENE-060616-210                                                  | 6.541 | 0.003 | zgc:136474        | zgc:136474                                                   |
| A_15_P520017 | NA                                                                   | 0.518 | 0.005 | LOC564833         | hypothetical LOC564833                                       |
| A_15_P106031 | ZDB-GENE-050208-786                                                  | 1.568 | 0.022 | si:dkey-1b17.11   | si:dkey-1b17.11                                              |
| A_15_P506827 | ZDB-GENE-040912-89                                                   | 1.402 | 0.042 | zgc:92806         | zgc:92806                                                    |
| A_15_P753496 | ZDB-GENE-991110-23                                                   | 1.409 | 0.042 | krt5              | keratin 5                                                    |
| A_15_P331554 | ZDB-GENE-030131-9099                                                 | 2.003 | 0.001 | nap114a           | nucleosome assembly protein 1-like 4a                        |
| A_15_P114599 | ZDB-GENE-040912-107                                                  | 1.767 | 0.01  | zgc:103678        | zgc:103678                                                   |
| A_15_P751886 | ZDB-GENE-050306-53                                                   | 1.549 | 0.019 | zgc:110741        | zgc:110741                                                   |
| A_15_P496322 | ZDB-GENE-030131-9830                                                 | 1.429 | 0.016 | wdr3              | WD repeat domain 3                                           |
| A_15_P595712 | NA                                                                   | 0.539 | 0.002 | LOC100150862      | transmembrane receptor Roundabout3-like                      |
| A_15_P108092 | ZDB-GENE-011119-1                                                    | 1.791 | 0.002 | gpc4              | glypican 4                                                   |
| A_15_P112452 | NA                                                                   | 2.013 | 0.028 | LOC558198         | APurinic/aprimidinic endoNuclease family member (apn-1)-like |
| A_15_P656466 | ZDB-GENE-040426-921                                                  | 1.398 | 0.031 | gipc2             | GIPC PDZ domain containing family, member 2                  |
| A_15_P176221 | ZDB-GENE-040930-2                                                    | 1.601 | 0.004 | zgc:91802         | zgc:91802                                                    |
| A_15_P446355 | ZDB-GENE-060825-83                                                   | 2.821 | 0.015 | cyb5r2            | cytochrome b5 reductase 2                                    |
| A_15_P133471 | ZDB-GENE-040915-3                                                    | 2.005 | 0.001 | kri1l             | KRI1 homolog like                                            |
| A_15_P110205 | ZDB-GENE-080723-7                                                    | 0.64  | 0.019 | npm4              | nucleophosmin/nucleoplasmin, 4                               |
| A_15_P154456 | ZDB-GENE-020419-35                                                   | 1.591 | 0.014 | mak16             | MAK16 homolog (S. cerevisiae)                                |

|              |                      |        |       |                    |                                                                                                 |
|--------------|----------------------|--------|-------|--------------------|-------------------------------------------------------------------------------------------------|
| A_15_P657946 | ZDB-GENE-030131-4089 | 0.555  | 0.014 | p4ha1              | procollagen-proline, 2-oxoglutarate 4-dioxygenase (proline 4-hydroxylase), alpha polypeptide I  |
| A_15_P660581 | ZDB-GENE-061013-129  | 0.66   | 0.02  | ints9              | integrator complex subunit 9                                                                    |
| A_15_P196171 | ZDB-GENE-050410-3    | 2.466  | 0.002 | hsh2d              | hematopoietic SH2 domain containing                                                             |
| A_15_P117460 | ZDB-GENE-041111-239  | 1.345  | 0.033 | cox10              | COX10 homolog, cytochrome c oxidase assembly protein, heme A: farnesyltransferase (yeast)       |
| A_15_P132931 | ZDB-GENE-030708-2    | 0.74   | 0.041 | zic3               | zic family member 3 heterotaxy 1 (odd-paired homolog, Drosophila)                               |
| A_15_P187306 | NA                   | 4.327  | 0     | LOC557782          | similar to N-acetylgalactosaminyltransferase                                                    |
| A_15_P106134 | ZDB-GENE-980526-140  | 0.607  | 0.005 | pou3f3b            | POU class 3 homeobox 3b                                                                         |
| A_15_P729061 | ZDB-GENE-040426-900  | 0.708  | 0.037 | ung                | uracil-DNA glycosylase                                                                          |
| A_15_P654901 | ZDB-GENE-980526-532  | 0.687  | 0.03  | hoxc3a             | homeo box C3a                                                                                   |
| A_15_P520572 | ZDB-GENE-030131-5577 | 28.839 | 0     | TC410352           | wu:fi04f09                                                                                      |
| A_15_P178781 | ZDB-GENE-060531-56   | 0.628  | 0.003 | si:ch211-278b8.3   | si:ch211-278b8.3                                                                                |
| A_15_P159361 | NA                   | 2.238  | 0.001 | LOC567778          | golgi transport 1 homolog B-like                                                                |
| A_15_P175076 | ZDB-GENE-040426-893  | 1.499  | 0.015 | nola1              | nucleolar protein family A, member 1 (H/ACA small nucleolar RNPs)                               |
| A_15_P633526 | ZDB-GENE-040426-2809 | 0.276  | 0.001 | zgc:55574          | zgc:55574                                                                                       |
| A_15_P201531 | ZDB-GENE-070912-256  | 2.437  | 0.001 | si:ch211-260b17.6  | si:ch211-260b17.6                                                                               |
| A_15_P227261 | ZDB-GENE-040426-1715 | 1.962  | 0     | zgc:73210          | zgc:73210                                                                                       |
| A_15_P309106 | NA                   | 1.654  | 0.013 | ENSDART00000081747 | zinc finger protein 345-like                                                                    |
| A_15_P392920 | ZDB-GENE-080204-91   | 0.597  | 0.004 | zgc:175165         | RNA binding motif protein 15B                                                                   |
| A_15_P140476 | ZDB-GENE-030131-5796 | 1.502  | 0.035 | si:ch211-129c21.1  | si:ch211-129c21.1                                                                               |
| A_15_P183756 | NA                   | 1.516  | 0.035 | LOC556532          | opiate receptor-like 1-like                                                                     |
| A_15_P170906 | ZDB-GENE-080708-1    | 1.608  | 0.003 | mif                | macrophage migration inhibitory factor                                                          |
| A_15_P176991 | NA                   | 2.103  | 0.009 | LOC570474          | similar to 5-hydroxyisourate hydrolase (HIU hydrolase) (HIUase) (Transthyretin-related protein) |
| A_15_P114423 | ZDB-GENE-040426-2562 | 0.416  | 0.009 | arhgap11a          | Rho GTPase activating protein 11A                                                               |
| A_15_P108964 | ZDB-GENE-040426-1110 | 1.386  | 0.019 | strap              | serine/threonine kinase receptor associated protein                                             |
| A_15_P116103 | ZDB-GENE-040704-75   | 1.288  | 0.041 | zgc:91984          | zgc:91984                                                                                       |
| A_15_P734436 | ZDB-GENE-061103-190  | 1.543  | 0.014 | zgc:153953         | zgc:153953                                                                                      |
| A_15_P157321 | NA                   | 1.612  | 0.014 | LOC565414          | tripartite motif protein TRIM29-like                                                            |
| A_15_P285646 | ZDB-GENE-050522-263  | 0.541  | 0.013 | cnn3b              | calponin 3, acidic b                                                                            |
| A_15_P631871 | ZDB-GENE-020117-2    | 0.539  | 0.002 | gbx1               | gastrulation brain homeobox 1                                                                   |
| A_15_P755551 | ZDB-GENE-020419-27   | 0.446  | 0     | mcm7               | MCM7 minichromosome maintenance deficient 7 (S. cerevisiae)                                     |

|              |                      |       |       |                    |                                                                         |
|--------------|----------------------|-------|-------|--------------------|-------------------------------------------------------------------------|
| A_15_P166644 | ZDB-GENE-030131-6822 | 0.692 | 0.047 | ENSDART00000039725 | wu:fa07b03                                                              |
| A_15_P622771 | ZDB-GENE-040718-442  | 0.618 | 0.02  | csdc2              | cold shock domain containing C2, RNA binding                            |
| A_15_P113391 | ZDB-GENE-011128-9    | 0.65  | 0.006 | gc3                | guanylyl cyclase 3                                                      |
| A_15_P741321 | ZDB-GENE-040426-2178 | 1.399 | 0.018 | akirin1            | akirin 1                                                                |
| A_15_P622851 | ZDB-GENE-040718-452  | 1.408 | 0.038 | csrp2bp            | cysteine and glycine-rich protein 2 binding protein                     |
| A_15_P166286 | ZDB-GENE-030131-6378 | 1.505 | 0.037 | heatr1             | HEAT repeat containing 1                                                |
| A_15_P630356 | ZDB-GENE-040801-35   | 1.811 | 0.001 | zgc:100864         | zgc:100864                                                              |
| A_15_P476446 | ZDB-GENE-030131-2260 | 1.389 | 0.02  | znf280d            | zinc finger protein 280D                                                |
| A_15_P341865 | ZDB-GENE-040426-2655 | 3.297 | 0     | timp2b             | tissue inhibitor of metalloproteinase 2b                                |
| A_15_P284981 | NA                   | 1.407 | 0.021 | zgc:136497         | coiled-coil domain containing 104, hypothetical protein LOC407682       |
| A_15_P402950 | NA                   | 0.57  | 0.003 | tom1               | similar to target of myb1 (chicken)                                     |
| A_15_P566382 | NA                   | 1.356 | 0.03  | TC421815           | g protein-coupled receptor kinase 6-like                                |
| A_15_P119203 | ZDB-GENE-041219-1    | 0.5   | 0     | sfrs6b             | serine/arginine-rich splicing factor 6b                                 |
| A_15_P754541 | ZDB-GENE-030131-6876 | 1.522 | 0.035 | trmt2a             | trm2 tRNA methyltransferase 2 homolog A (S. cerevisiae)                 |
| A_15_P744531 | ZDB-GENE-050417-20   | 1.905 | 0.002 | azin1a             | antizyme inhibitor 1a                                                   |
| A_15_P192496 | ZDB-GENE-050417-203  | 0.762 | 0.046 | zgc:112202         | zgc:112202                                                              |
| A_15_P219631 | ZDB-GENE-090313-107  | 0.405 | 0.026 | si:ch211-281g13.3  | si:ch211-281g13.3                                                       |
| A_15_P613677 | ZDB-GENE-030131-8319 | 0.39  | 0.009 | TC377173           | fibroblast growth factor binding protein 2                              |
| A_15_P316816 | ZDB-GENE-030131-3869 | 0.589 | 0.009 | zgc:194596         | zgc:194596                                                              |
| A_15_P105466 | ZDB-GENE-990415-247  | 0.593 | 0.012 | rrm1               | ribonucleotide reductase M1 polypeptide                                 |
| A_15_P142436 | ZDB-GENE-070424-30   | 1.91  | 0.019 | ccnd2a             | cyclin D2 a                                                             |
| A_15_P666676 | ZDB-GENE-040122-3    | 0.591 | 0.031 | rab5ab             | RAB5A, member RAS oncogene family, b                                    |
| A_15_P136151 | ZDB-GENE-030131-6268 | 1.411 | 0.033 | wu:fi41d10         | wu:fi41d10                                                              |
| A_15_P282191 | ZDB-GENE-010323-5    | 0.568 | 0.003 | papss2b            | 3'-phosphoadenosine 5'-phosphosulfate synthase 2b                       |
| A_15_P153751 | ZDB-GENE-030131-4591 | 0.387 | 0.003 | si:dkey-91f15.6    | si:dkey-91f15.6                                                         |
| A_15_P626681 | ZDB-GENE-040426-815  | 0.705 | 0.048 | ppm1d              | protein phosphatase 1D magnesium-dependent, delta isoform               |
| A_15_P719731 | ZDB-GENE-041114-6    | 0.549 | 0.032 | ace2               | angiotensin I converting enzyme (peptidyl-dipeptidase A) 2              |
| A_15_P707233 | ZDB-GENE-040808-68   | 0.685 | 0.023 | acat1              | acetyl-Coenzyme A acetyltransferase 1 (acetoacetyl Coenzyme A thiolase) |
| A_15_P729591 | ZDB-GENE-040426-877  | 1.451 | 0.044 | zgc:56064          | zgc:56064                                                               |
| A_15_P624867 | NA                   | 0.436 | 0.018 | LOC100008037       | similar to pol polyprotein                                              |

|              |                      |       |       |                   |                                                                                                                 |
|--------------|----------------------|-------|-------|-------------------|-----------------------------------------------------------------------------------------------------------------|
| A_15_P746541 | ZDB-GENE-030131-9439 | 5.301 | 0     | Inx1              | ligand of numb-protein X 1                                                                                      |
| A_15_P422125 | NA                   | 2.29  | 0.009 | LOC562078         | hypothetical LOC562078                                                                                          |
| A_15_P573082 | ZDB-GENE-041010-149  | 1.493 | 0.008 | zgc:101803        | zgc:101803                                                                                                      |
| A_15_P663301 | ZDB-GENE-041210-328  | 2.32  | 0.007 | si:ch211-240l19.6 | si:ch211-240l19.6                                                                                               |
| A_15_P538362 | ZDB-GENE-030131-9676 | 0.662 | 0.006 | c10orf119         | c10orf119 homolog (H. sapiens)                                                                                  |
| A_15_P624456 | ZDB-GENE-040628-5    | 0.598 | 0.006 | irx5b             | iroquois homeobox protein 5b                                                                                    |
| A_15_P633171 | ZDB-GENE-041008-125  | 1.837 | 0.031 | mrpl48            | mitochondrial ribosomal protein L48                                                                             |
| A_15_P120718 | ZDB-GENE-030131-5783 | 1.497 | 0.014 | rasgef1ba         | RasGEF domain family, member 1Ba                                                                                |
| A_15_P207541 | ZDB-GENE-050309-90   | 1.578 | 0.008 | si:ch211-62b4.3   | si:ch211-62b4.3                                                                                                 |
| A_15_P110098 | ZDB-GENE-041112-1    | 2.137 | 0.001 | asah2             | N-acylsphingosine amidohydrolase 2                                                                              |
| A_15_P120038 | ZDB-GENE-071004-19   | 1.717 | 0.011 | zgc:171672        | zgc:171672                                                                                                      |
| A_15_P207916 | ZDB-GENE-050417-38   | 1.795 | 0.001 | zgc:110084        | zgc:110084                                                                                                      |
| A_15_P118379 | ZDB-GENE-040426-1785 | 1.572 | 0.042 | fkbp1b            | FK506 binding protein 1b                                                                                        |
| A_15_P296466 | NA                   | 0.687 | 0.015 | LOC559742         | novel protein similar to human high-mobility group protein 2-like 1 (HMG2L1), hypothetical protein LOC100331318 |
| A_15_P727581 | ZDB-GENE-070410-77   | 1.623 | 0.038 | zgc:162349        | zgc:162349                                                                                                      |
| A_15_P112266 | ZDB-GENE-040625-161  | 2.004 | 0.002 | rpp40l            | ribonuclease P 40 subunit like                                                                                  |
| A_15_P598557 | ZDB-GENE-040426-1023 | 0.751 | 0.028 | zgc:56418         | H3 histone, family 3D                                                                                           |
| A_15_P727751 | ZDB-GENE-060825-261  | 0.745 | 0.027 | zgc:153609        | zgc:153609                                                                                                      |
| A_15_P433195 | NA                   | 2.089 | 0.001 | CK146161          | hypothetical LOC100151606                                                                                       |
| A_15_P105359 | ZDB-GENE-060421-2654 | 1.792 | 0.007 | tnfaip6           | tumor necrosis factor, alpha-induced protein 6                                                                  |
| A_15_P755911 | ZDB-GENE-030131-1921 | 0.635 | 0.02  | marcksb           | myristoylated alanine rich protein kinase C substrate b                                                         |
| A_15_P671731 | NA                   | 1.648 | 0.018 | wu:fj97g09        | hypothetical protein LOC100331431                                                                               |
| A_15_P185526 | ZDB-GENE-050522-545  | 1.419 | 0.021 | zgc:112231        | zgc:112231                                                                                                      |
| A_15_P237986 | ZDB-GENE-040426-931  | 0.762 | 0.044 | sfrs8             | splicing factor, arginine/serine-rich 8 (suppressor-of-white-apricot homolog, Drosophila)                       |
| A_15_P120898 | ZDB-GENE-040426-1464 | 0.729 | 0.026 | zgc:65891         | zgc:65891                                                                                                       |
| A_15_P171261 | ZDB-GENE-030821-1    | 1.486 | 0.042 | aldocb            | aldolase C, fructose-bisphosphate, b                                                                            |
| A_15_P631711 | ZDB-GENE-040912-91   | 1.767 | 0.035 | cox17             | COX17 cytochrome c oxidase assembly homolog (S. cerevisiae)                                                     |
| A_15_P133416 | ZDB-GENE-990714-15   | 0.692 | 0.041 | dnmt1             | DNA (cytosine-5-)-methyltransferase 1                                                                           |
| A_15_P101922 | ZDB-GENE-011213-1    | 1.629 | 0.004 | her9              | hairy-related 9                                                                                                 |
| A_15_P627501 | ZDB-GENE-050417-213  | 1.396 | 0.044 | idh3g             | isocitrate dehydrogenase 3 (NAD+) gamma                                                                         |

|              |                                           |       |       |                    |                                                                      |
|--------------|-------------------------------------------|-------|-------|--------------------|----------------------------------------------------------------------|
| A_15_P431445 | ZDB-GENE-051120-57                        | 1.473 | 0.022 | zgc:123285         | zgc:123285                                                           |
| A_15_P722091 | ZDB-GENE-021231-3                         | 1.552 | 0.017 | wdr43              | WD repeat domain 43                                                  |
| A_15_P113484 | ZDB-GENE-040912-49                        | 1.934 | 0.001 | tctex1d1           | Tctex1 domain containing 1                                           |
| A_15_P195106 | ZDB-GENE-040704-48                        | 1.652 | 0.025 | acaal1             | acetyl-Coenzyme A acyltransferase 1                                  |
| A_15_P764441 | ZDB-GENE-071004-87,<br>ZDB-GENE-050306-54 | 0.648 | 0.034 | zgc:173617         | zgc:173617, zgc:113096                                               |
| A_15_P237946 | ZDB-GENE-060810-66                        | 1.49  | 0.011 | ENSDART00000091835 | general transcription factor IIIC, polypeptide 5                     |
| A_15_P119947 | ZDB-GENE-041010-76                        | 2.328 | 0.045 | ctsl               | cathepsin L, like                                                    |
| A_15_P141491 | ZDB-GENE-050309-289                       | 0.698 | 0.021 | setd1ba            | SET domain containing 1B, a                                          |
| A_15_P159266 | ZDB-GENE-030131-8917                      | 1.43  | 0.023 | plxnb2a            | plexin b2a                                                           |
| A_15_P373690 | ZDB-GENE-030131-8188                      | 0.492 | 0.001 | wu:fj59a07         | wu:fj59a07                                                           |
| A_15_P201116 | ZDB-GENE-070122-4                         | 0.62  | 0.016 | rbm45              | RNA binding motif protein 45                                         |
| A_15_P620201 | ZDB-GENE-031118-197                       | 0.645 | 0.01  | asf1ba             | ASF1 anti-silencing function 1 homolog Ba ( <i>S. cerevisiae</i> )   |
| A_15_P148681 | ZDB-GENE-990415-153                       | 5.698 | 0     | mdm2               | transformed 3T3 cell double minute 2 homolog (mouse)                 |
| A_15_P742236 | ZDB-GENE-030131-2332                      | 1.594 | 0.007 | zgc:64137          | zgc:64137                                                            |
| A_15_P342170 | ZDB-GENE-030131-9770                      | 1.529 | 0.011 | amotl2             | angiomin like 2                                                      |
| A_15_P212981 | ZDB-GENE-050417-217                       | 0.551 | 0.005 | yod1               | YOD1 OTU deubiquinating enzyme 1 homolog ( <i>S. cerevisiae</i> )    |
| A_15_P200176 | ZDB-GENE-090313-270                       | 0.658 | 0.029 | si:dkey-245p14.2   | si:dkey-245p14.2                                                     |
| A_15_P621831 | ZDB-GENE-030131-4097                      | 0.595 | 0.006 | scrt2              | scratch homolog 2, zinc finger protein ( <i>Drosophila</i> )         |
| A_15_P580367 | ZDB-GENE-060929-604                       | 0.672 | 0.016 | zgc:153103         | zgc:153103                                                           |
| A_15_P162831 | ZDB-GENE-040429-1                         | 0.559 | 0.005 | sox21b             | SRY-box containing gene 21 b                                         |
| A_15_P120699 | ZDB-GENE-040426-2344                      | 0.649 | 0.04  | khdrbs1b           | KH domain containing, RNA binding, signal transduction associated 1b |
| A_15_P419955 | ZDB-GENE-040426-2216                      | 1.648 | 0.006 | rcc1               | regulator of chromosome condensation 1                               |
| A_15_P114892 | ZDB-GENE-070912-680                       | 2.334 | 0     | si:dkeyp-73d8.3    | si:dkeyp-73d8.3                                                      |
| A_15_P578292 | ZDB-GENE-030131-9923                      | 0.657 | 0.011 | hells              | helicase, lymphoid-specific                                          |
| A_15_P215856 | ZDB-GENE-030131-5941                      | 0.359 | 0.001 | wu:fi26e04         | wu:fi26e04                                                           |
| A_15_P100161 | ZDB-GENE-030131-179                       | 1.424 | 0.025 | zgc:55671          | zgc:55671                                                            |
| A_15_P100633 | ZDB-GENE-040426-1760                      | 1.496 | 0.028 | zgc:73324          | zgc:73324                                                            |
| A_15_P324091 | ZDB-GENE-040426-1264                      | 1.746 | 0.002 | wdr46              | WD repeat domain 46                                                  |
| A_15_P727231 | ZDB-GENE-070112-2362                      | 0.371 | 0.001 | mybpc3             | myosin binding protein C, cardiac                                    |
| A_15_P161461 | ZDB-GENE-030131-8398                      | 0.66  | 0.009 | si:dkey-42i9.4     | si:dkey-42i9.4                                                       |



|              |                                          |       |       |                    |                                                                                                                          |
|--------------|------------------------------------------|-------|-------|--------------------|--------------------------------------------------------------------------------------------------------------------------|
| A_15_P746316 | ZDB-GENE-030131-975                      | 1.912 | 0.001 | eif5               | eukaryotic translation initiation factor 5                                                                               |
| A_15_P729106 | ZDB-GENE-030219-74                       | 1.895 | 0.009 | lmo7a              | LIM domain only 7a                                                                                                       |
| A_15_P264601 | NA                                       | 1.48  | 0.012 | ENSDART00000103921 | hypothetical protein LOC100329640                                                                                        |
| A_15_P259671 | ZDB-GENE-070209-238                      | 0.546 | 0.028 | vcam1              | vascular cell adhesion molecule 1                                                                                        |
| A_15_P209741 | ZDB-GENE-030131-2182                     | 1.397 | 0.038 | pa2g4b             | proliferation-associated 2G4 ,b                                                                                          |
| A_15_P622586 | ZDB-GENE-010724-4,<br>ZDB-GENE-040822-32 | 0.313 | 0     | mpz                | myelin protein zero, growth factor receptor-bound protein 10a                                                            |
| A_15_P520162 | ZDB-GENE-060519-13                       | 0.691 | 0.044 | atxn7l2a           | ataxin 7-like 2a                                                                                                         |
| A_15_P579352 | ZDB-GENE-050417-150                      | 4.916 | 0.001 | zgc:112054         | zgc:112054                                                                                                               |
| A_15_P419905 | NA                                       | 0.584 | 0.003 | LOC100003386       | novel protein similar to vertebrate family with sequence similarity 19 (chemokine (C-C motif)-like), member A4 (FAM19A4) |
| A_15_P103585 | ZDB-GENE-030131-3065                     | 0.704 | 0.027 | wu:fc26c03         | wu:fc26c03                                                                                                               |
| A_15_P740061 | ZDB-GENE-031118-110                      | 1.527 | 0.004 | eif6               | eukaryotic translation initiation factor 6                                                                               |
| A_15_P158641 | ZDB-GENE-040426-895                      | 1.447 | 0.027 | pitpnb             | phosphatidylinositol transfer protein, beta                                                                              |
| A_15_P103093 | ZDB-GENE-040912-167                      | 0.464 | 0     | dirc2              | disrupted in renal carcinoma 2                                                                                           |
| A_15_P725656 | ZDB-GENE-061013-64                       | 1.52  | 0.033 | zgc:153386         | zgc:153386                                                                                                               |
| A_15_P136416 | NA                                       | 0.637 | 0.024 | LOC558687          | type II CAX cation/proton exchanger-like                                                                                 |
| A_15_P114537 | ZDB-GENE-030411-2                        | 0.704 | 0.012 | cenpa              | histone H3-like centromeric protein A, selenoprotein H                                                                   |
| A_15_P661816 | ZDB-GENE-050327-95                       | 1.746 | 0.016 | zgc:110783         | zgc:110783                                                                                                               |
| A_15_P442255 | ZDB-GENE-070410-120                      | 0.721 | 0.029 | zgc:162977         | zgc:162977                                                                                                               |
| A_15_P111911 | ZDB-GENE-010507-2                        | 1.482 | 0.008 | clica              | chloride intracellular channel a                                                                                         |
| A_15_P665251 | NA                                       | 1.563 | 0.009 | LOC558513          | similar to Transcription cofactor vestigial-like protein 1 (Vgl-1) (Protein TONDU)                                       |
| A_15_P676651 | NA                                       | 1.556 | 0.05  | LOC555648          | hypothetical LOC555648                                                                                                   |
| A_15_P115950 | ZDB-GENE-040317-1                        | 0.638 | 0.022 | rem1               | rad and gem related GTP binding protein 1                                                                                |
| A_15_P628671 | ZDB-GENE-030219-119                      | 1.547 | 0.006 | rps6ka3a           | ribosomal protein S6 kinase, polypeptide 3a                                                                              |
| A_15_P643761 | ZDB-GENE-041014-208                      | 1.995 | 0.025 | si:ch211-171o19.1  | si:ch211-171o19.1                                                                                                        |
| A_15_P114288 | ZDB-GENE-050517-31                       | 1.492 | 0.014 | abcf1              | ATP-binding cassette, sub-family F (GCN20), member 1                                                                     |
| A_15_P106074 | ZDB-GENE-040426-1686                     | 1.438 | 0.015 | cops5              | COP9 constitutive photomorphogenic homolog subunit 5                                                                     |
| A_15_P120274 | ZDB-GENE-990415-48                       | 0.603 | 0.015 | dlx1a              | distal-less homeobox gene 1a                                                                                             |
| A_15_P115045 | ZDB-GENE-041010-19                       | 1.364 | 0.038 | zgc:103658         | zgc:103658                                                                                                               |
| A_15_P163091 | ZDB-GENE-070112-1012                     | 1.576 | 0.009 | ldlrp1b            | low density lipoprotein receptor adaptor protein 1b                                                                      |
| A_15_P203906 | NA                                       | 2.402 | 0.003 | ENSDART00000019941 | glucose transporter X-like                                                                                               |

|              |                                                                                       |        |       |                    |                                                                                              |
|--------------|---------------------------------------------------------------------------------------|--------|-------|--------------------|----------------------------------------------------------------------------------------------|
| A_15_P145921 | ZDB-GENE-060526-3                                                                     | 2.526  | 0.018 | si:ch211-106a19.1  | si:ch211-106a19.1                                                                            |
| A_15_P207666 | ZDB-GENE-030131-616                                                                   | 1.613  | 0.006 | gnl3               | guanine nucleotide binding protein-like 3 (nucleolar)                                        |
| A_15_P564607 | ZDB-GENE-040426-2136                                                                  | 1.709  | 0.031 | zgc:64161          | zgc:64161                                                                                    |
| A_15_P178876 | NA                                                                                    | 4.396  | 0.006 | LOC100330224       | fatty acid binding protein 1b-like                                                           |
| A_15_P449960 | NA                                                                                    | 1.359  | 0.048 | TC426048           | brain washing-like                                                                           |
| A_15_P148586 | ZDB-GENE-040426-1288                                                                  | 1.438  | 0.043 | chordc1            | cysteine and histidine-rich domain (CHORD)-containing, zinc binding protein 1                |
| A_15_P655436 | ZDB-GENE-041010-40                                                                    | 0.378  | 0.007 | zgc:101859         | zgc:101859                                                                                   |
| A_15_P403295 | ZDB-GENE-030131-1826                                                                  | 2.267  | 0.016 | wu:fb81h03         | wu:fb81h03                                                                                   |
| A_15_P734956 | NA                                                                                    | 0.579  | 0.002 | EH542688           | Tumor protein p53-inducible nuclear protein 2-like                                           |
| A_15_P176121 | ZDB-GENE-000713-1                                                                     | 11.013 | 0     | casps8             | caspace 8, apoptosis-related cysteine peptidase                                              |
| A_15_P679551 | NA                                                                                    | 1.44   | 0.015 | TC378792           | Solute carrier family 25 member 38-B                                                         |
| A_15_P622052 | ZDB-GENE-041010-48                                                                    | 2.141  | 0.03  | casps6l1           | caspace 6, apoptosis-related cysteine peptidase, like 1                                      |
| A_15_P131076 | ZDB-GENE-050522-28                                                                    | 0.655  | 0.033 | barx1              | BarH-like homeobox 1                                                                         |
| A_15_P163006 | ZDB-GENE-030131-5912                                                                  | 1.474  | 0.008 | xpo6               | exportin 6                                                                                   |
| A_15_P624896 | ZDB-GENE-071004-96,<br>ZDB-GENE-070424-32,<br>ZDB-GENE-060918-4,<br>ZDB-GENE-070720-9 | 0.408  | 0.041 | crygm2d10          | crystallin, gamma M2d10, zgc:162402, crystallin, gamma M2d5, zgc:165347                      |
| A_15_P208016 | ZDB-GENE-060616-24                                                                    | 1.486  | 0.016 | zgc:136758         | zgc:136758                                                                                   |
| A_15_P108716 | ZDB-GENE-040724-75                                                                    | 1.831  | 0.005 | si:ch211-184m19.2  | si:ch211-184m19.2                                                                            |
| A_15_P172456 | ZDB-GENE-040616-1                                                                     | 2.048  | 0.018 | serac1             | serine active site containing 1                                                              |
| A_15_P763716 | NA                                                                                    | 0.522  | 0.044 | NP13317314         | NIMA-related kinase 4-like                                                                   |
| A_15_P499672 | NA                                                                                    | 1.48   | 0.032 | ENSDART00000114723 | Rap guanine nucleotide exchange factor (GEF)-like 1-like                                     |
| A_15_P658891 | ZDB-GENE-990708-7                                                                     | 0.491  | 0.001 | otpb               | orthopedia homolog b                                                                         |
| A_15_P212956 | ZDB-GENE-040704-1                                                                     | 0.401  | 0.015 | zgc:91968          | zgc:91968                                                                                    |
| A_15_P434570 | ZDB-GENE-030131-3189                                                                  | 1.514  | 0.031 | wu:fa04d12         | wu:fc30b09                                                                                   |
| A_15_P105720 | ZDB-GENE-050116-2                                                                     | 1.361  | 0.022 | prkar1aa           | protein kinase, cAMP-dependent, regulatory, type I, alpha (tissue specific extinguisher 1) a |
| A_15_P727941 | ZDB-GENE-040704-17                                                                    | 1.334  | 0.041 | zgc:91908          | zgc:91908                                                                                    |
| A_15_P107578 | ZDB-GENE-031112-9                                                                     | 1.608  | 0.003 | gemin5             | gem (nuclear organelle) associated protein 5                                                 |
| A_15_P121218 | ZDB-GENE-030131-9847                                                                  | 0.435  | 0.037 | pdcd4b             | programmed cell death 4b                                                                     |
| A_15_P153441 | ZDB-GENE-010131-6                                                                     | 0.572  | 0.039 | mdkb               | midkine-related growth factor b                                                              |
| A_15_P119700 | ZDB-GENE-030131-1044                                                                  | 1.474  | 0.025 | rnf128a            | ring finger protein 128a                                                                     |

|              |                      |       |       |                    |                                                                                                              |
|--------------|----------------------|-------|-------|--------------------|--------------------------------------------------------------------------------------------------------------|
| A_15_P540497 | ZDB-GENE-030131-3654 | 0.653 | 0.011 | sp8b               | sp8 transcription factor b                                                                                   |
| A_15_P116699 | ZDB-GENE-030730-1    | 0.641 | 0.026 | neurod4            | neurogenic differentiation 4                                                                                 |
| A_15_P663021 | ZDB-GENE-000210-34   | 0.6   | 0.006 | nme3               | non-metastatic cells 3, protein expressed in                                                                 |
| A_15_P622171 | NA                   | 1.572 | 0.006 | LOC100003308       | similar to serine protease, hypothetical protein LOC100149563                                                |
| A_15_P355035 | NA                   | 1.5   | 0.016 | ENSDART00000084553 | retinitis pigmentosa GTPase regulator-like                                                                   |
| A_15_P756851 | ZDB-GENE-031002-33   | 1.354 | 0.039 | pfn1               | profilin 1                                                                                                   |
| A_15_P676663 | ZDB-GENE-060825-13   | 0.566 | 0.021 | zgc:153121         | zgc:153121                                                                                                   |
| A_15_P569657 | ZDB-GENE-040625-68   | 0.224 | 0     | cbx1b              | chromobox homolog 1b (HP1 beta homolog Drosophila)                                                           |
| A_15_P166716 | NA                   | 0.392 | 0.002 | LOC794083          | pyruvate dehydrogenase kinase 2-like                                                                         |
| A_15_P597537 | ZDB-GENE-041008-196  | 1.419 | 0.02  | ppl                | periplakin                                                                                                   |
| A_15_P219041 | NA                   | 0.767 | 0.047 | cables1            | CDK5 and ABL1 enzyme substrate 1                                                                             |
| A_15_P751646 | ZDB-GENE-021213-1    | 2.059 | 0.003 | sdad1              | SDA1 domain containing 1                                                                                     |
| A_15_P662321 | ZDB-GENE-060929-1086 | 0.66  | 0.027 | dync1i2a           | dynein, cytoplasmic 1, intermediate chain 2a                                                                 |
| A_15_P101053 | ZDB-GENE-990706-5    | 0.678 | 0.021 | svil               | supervillin                                                                                                  |
| A_15_P735896 | ZDB-GENE-000607-83   | 1.493 | 0.013 | kr4                | keratin 4                                                                                                    |
| A_15_P222036 | ZDB-GENE-030909-6    | 0.408 | 0.001 | mcm6               | MCM6 minichromosome maintenance deficient 6, mitotin (S. cerevisiae)                                         |
| A_15_P241366 | ZDB-GENE-060503-202  | 2.037 | 0.009 | si:ch211-185o22.2  | si:ch211-185o22.2                                                                                            |
| A_15_P489382 | NA                   | 1.422 | 0.041 | LOC565984          | similar to Protein-glutamine gamma-glutamyltransferase 5 (Transglutaminase-5) (TGase 5) (Transglutaminase 5) |
| A_15_P102359 | ZDB-GENE-040426-2757 | 0.564 | 0.033 | nudt1              | nudix (nucleoside diphosphate linked moiety X)-type motif 1                                                  |
| A_15_P196481 | ZDB-GENE-051120-21   | 1.537 | 0.013 | zgc:123178         | zgc:123178                                                                                                   |
| A_15_P719796 | ZDB-GENE-040426-2020 | 0.536 | 0.004 | caprin1b           | cell cycle associated protein 1b                                                                             |
| A_15_P665716 | ZDB-GENE-070705-557  | 0.661 | 0.009 | pole               | polymerase (DNA directed), epsilon                                                                           |
| A_15_P753851 | ZDB-GENE-040801-181  | 0.524 | 0.01  | zgc:92533          | zgc:92533                                                                                                    |
| A_15_P620846 | ZDB-GENE-040718-161  | 0.664 | 0.011 | zgc:92907          | zgc:92907                                                                                                    |
| A_15_P632236 | ZDB-GENE-011128-2    | 0.391 | 0     | jag1a              | jagged 1a                                                                                                    |
| A_15_P120557 | ZDB-GENE-030131-5596 | 0.661 | 0.007 | wu:fi05d05         | wu:fi05d05                                                                                                   |
| A_15_P506957 | ZDB-GENE-990415-25   | 0.545 | 0.002 | rrm2               | ribonucleotide reductase M2 polypeptide                                                                      |
| A_15_P145741 | NA                   | 0.686 | 0.022 | LOC100002370       | similar to zinc finger CCCH-type containing 12B                                                              |
| A_15_P670531 | ZDB-GENE-040426-945  | 0.374 | 0.003 | pvalb3             | parvalbumin 3                                                                                                |
| A_15_P110901 | ZDB-GENE-030616-115  | 0.504 | 0.003 | ltk                | leukocyte tyrosine kinase                                                                                    |

|              |                      |       |       |                    |                                                                                             |
|--------------|----------------------|-------|-------|--------------------|---------------------------------------------------------------------------------------------|
| A_15_P184666 | NA                   | 1.506 | 0.006 | ENSDART00000113674 | Nicotinic acid receptor 1-like                                                              |
| A_15_P131946 | ZDB-GENE-001101-1    | 0.587 | 0.002 | nos1               | nitric oxide synthase 1 (neuronal)                                                          |
| A_15_P652456 | ZDB-GENE-040930-11   | 1.477 | 0.034 | rcl1               | RNA terminal phosphate cyclase-like 1                                                       |
| A_15_P111684 | ZDB-GENE-060421-2909 | 1.602 | 0.015 | zgc:136360         | zgc:136360                                                                                  |
| A_15_P107909 | ZDB-GENE-050307-5    | 0.645 | 0.024 | tmsb               | thymosin, beta                                                                              |
| A_15_P656491 | ZDB-GENE-980526-220  | 0.65  | 0.045 | pou3f3a            | POU class 3 homeobox 3a                                                                     |
| A_15_P760051 | NA                   | 0.607 | 0.027 | NP13321454         | Taar9 protein-like                                                                          |
| A_15_P739301 | ZDB-GENE-990715-9    | 0.689 | 0.017 | skia               | nuclear oncoprotein skia                                                                    |
| A_15_P632626 | ZDB-GENE-090313-165  | 2.882 | 0.003 | si:ch73-6k14.1     | si:ch73-6k14.1                                                                              |
| A_15_P406710 | ZDB-GENE-050208-290  | 1.453 | 0.015 | acp6               | acid phosphatase 6, lysophosphatidic                                                        |
| A_15_P121350 | ZDB-GENE-031222-2    | 0.399 | 0     | ivns1abpa          | influenza virus NS1A binding protein a                                                      |
| A_15_P153951 | ZDB-GENE-050913-133  | 0.396 | 0.003 | b3gnt1             | UDP-GlcNAc:betaGal beta-1,3-N-acetylglucosaminyltransferase-like 1                          |
| A_15_P638399 | ZDB-GENE-030131-5801 | 0.516 | 0.041 | tk1                | thymidine kinase 1, soluble                                                                 |
| A_15_P519107 | NA                   | 9.936 | 0     | ENSDART00000073432 | retinoblastoma-like 2 (p130)-like                                                           |
| A_15_P104292 | ZDB-GENE-030904-9    | 0.474 | 0.002 | vax1               | ventral anterior homeobox 1                                                                 |
| A_15_P434665 | NA                   | 0.544 | 0.004 | supt16h            | suppressor of Ty 16 homolog                                                                 |
| A_15_P151416 | ZDB-GENE-001207-7    | 0.688 | 0.032 | epha4a             | eph receptor A4a                                                                            |
| A_15_P178746 | NA                   | 0.718 | 0.021 | ENSDART00000112955 | similar to hCG30195                                                                         |
| A_15_P205251 | ZDB-GENE-050302-80   | 0.523 | 0.001 | scube2             | signal peptide, CUB domain, EGF-like 2                                                      |
| A_15_P439270 | NA                   | 0.599 | 0.006 | LOC556764          | similar to Probable RNA-dependent helicase p72 (DEAD-box protein p72) (DEAD-box protein 17) |
| A_15_P631866 | ZDB-GENE-980526-426  | 0.425 | 0.032 | fli1a              | friend leukemia integration 1a                                                              |
| A_15_P659346 | ZDB-GENE-050522-368  | 1.482 | 0.011 | mcee               | methylmalonyl CoA epimerase                                                                 |
| A_15_P226141 | NA                   | 1.948 | 0.001 | LOC570577          | integrin alpha 2-like                                                                       |
| A_15_P265376 | NA                   | 2.327 | 0.007 | sdccag3            | serologically defined colon cancer antigen 3-like                                           |
| A_15_P106502 | ZDB-GENE-050506-131  | 0.407 | 0     | zgc:174506         | zgc:174506                                                                                  |
| A_15_P100097 | ZDB-GENE-050706-140  | 1.45  | 0.012 | zgc:112345         | zgc:112345                                                                                  |
| A_15_P396525 | ZDB-GENE-040426-1037 | 2.556 | 0.008 | zgc:56466          | zgc:56466                                                                                   |
| A_15_P490942 | ZDB-GENE-050624-1    | 1.502 | 0.024 | angptl2            | angiotensin-like 2                                                                          |
| A_15_P115813 | ZDB-GENE-040426-2504 | 1.417 | 0.018 | tmub1              | transmembrane and ubiquitin-like domain containing 1                                        |
| A_15_P112037 | ZDB-GENE-030131-5742 | 1.394 | 0.039 | enc1               | ectodermal-neural cortex (with BTB-like domain)                                             |

|              |                      |       |       |                    |                                                                          |
|--------------|----------------------|-------|-------|--------------------|--------------------------------------------------------------------------|
| A_15_P660086 | ZDB-GENE-000517-1    | 1.445 | 0.036 | fgd                | faciogenital dysplasia                                                   |
| A_15_P136251 | NA                   | 1.746 | 0.001 | LOC796776          | hypothetical LOC796776                                                   |
| A_15_P605857 | NA                   | 0.692 | 0.03  | LOC100005963       | zinc finger protein 281-like                                             |
| A_15_P749971 | ZDB-GENE-070615-37   | 0.639 | 0.017 | zgc:165617         | zgc:165617                                                               |
| A_15_P222246 | ZDB-GENE-030131-760  | 1.668 | 0.003 | ip6k2              | inositol hexaphosphate kinase 2                                          |
| A_15_P721218 | ZDB-GENE-040426-2348 | 1.688 | 0.033 | zgc:85946          | zgc:85946                                                                |
| A_15_P140626 | ZDB-GENE-050320-154  | 1.929 | 0.019 | zgc:113516         | zgc:113516                                                               |
| A_15_P655091 | NA                   | 1.913 | 0.017 | crfa31.2           | IL-4RA-like protein 2                                                    |
| A_15_P107649 | ZDB-GENE-040426-1897 | 1.736 | 0.002 | naprt1             | nicotinate phosphoribosyltransferase domain containing 1                 |
| A_15_P110810 | ZDB-GENE-040426-2058 | 1.738 | 0.011 | hacl1              | 2-hydroxyacyl-CoA lyase 1                                                |
| A_15_P176031 | ZDB-GENE-020225-28   | 1.728 | 0.05  | nitr2a             | novel immune-type receptor 2a                                            |
| A_15_P104912 | ZDB-GENE-040426-1364 | 2.318 | 0.021 | slc16a9a           | solute carrier family 16 (monocarboxylic acid transporters), member 9a   |
| A_15_P649131 | ZDB-GENE-090313-135  | 0.654 | 0.041 | si:ch73-15j19.1    | si:ch73-15j19.1                                                          |
| A_15_P668281 | NA                   | 0.307 | 0.05  | LOC793325          | pheromone receptor                                                       |
| A_15_P621556 | ZDB-GENE-040426-1892 | 1.615 | 0.013 | dyx1c1             | dyslexia susceptibility 1 candidate 1                                    |
| A_15_P166861 | ZDB-GENE-980526-291  | 0.573 | 0.007 | hoxb8b             | homeo box B8b                                                            |
| A_15_P178506 | NA                   | 0.674 | 0.024 | ENSDART00000113461 | protocadherin 11 X-linked-like                                           |
| A_15_P110278 | ZDB-GENE-040426-1820 | 1.419 | 0.026 | pdpk1b             | 3-phosphoinositide dependent protein kinase-1b                           |
| A_15_P371925 | NA                   | 1.609 | 0.015 | TC382455           | hypothetical LOC799721                                                   |
| A_15_P631401 | ZDB-GENE-081022-24   | 4.316 | 0.001 | zgc:193681         | zgc:193681                                                               |
| A_15_P164496 | ZDB-GENE-041111-310  | 1.449 | 0.019 | si:ch211-212o1.2   | si:ch211-212o1.2                                                         |
| A_15_P345210 | ZDB-GENE-030131-5975 | 1.402 | 0.015 | klhl26             | kelch-like 26 (Drosophila)                                               |
| A_15_P162141 | ZDB-GENE-041104-1    | 0.64  | 0.023 | prmt2              | protein arginine methyltransferase 2                                     |
| A_15_P244716 | ZDB-GENE-081022-119  | 1.914 | 0.001 | zgc:194508         | zgc:194508                                                               |
| A_15_P481350 | NA                   | 0.574 | 0.014 | LOC571446          | hypothetical LOC571446                                                   |
| A_15_P571522 | ZDB-GENE-070820-8    | 0.756 | 0.046 | mntb               | MAX binding protein b                                                    |
| A_15_P274441 | ZDB-GENE-030131-7850 | 0.7   | 0.015 | anp32a             | acidic (leucine-rich) nuclear phosphoprotein 32 family, member A         |
| A_15_P119258 | ZDB-GENE-030616-612  | 1.297 | 0.049 | atp6v1c1a          | ATPase, H <sup>+</sup> transporting, lysosomal, V1 subunit C, isoform 1a |
| A_15_P157006 | ZDB-GENE-030326-6    | 1.553 | 0.021 | snai2              | snail homolog 2 (Drosophila)                                             |
| A_15_P154581 | NA                   | 1.591 | 0.003 | ENSDART00000078041 | hypothetical protein LOC553454                                           |

|              |                      |       |       |                    |                                                                 |
|--------------|----------------------|-------|-------|--------------------|-----------------------------------------------------------------|
| A_15_P116203 | ZDB-GENE-030616-56   | 1.734 | 0.004 | ccdc80             | coiled-coil domain containing 80                                |
| A_15_P154491 | ZDB-GENE-070117-2501 | 0.726 | 0.035 | sec24d             | SEC24 family, member D ( <i>S. cerevisiae</i> )                 |
| A_15_P173066 | ZDB-GENE-010906-1    | 0.684 | 0.049 | ache               | acetylcholinesterase                                            |
| A_15_P340150 | ZDB-GENE-080305-6    | 0.713 | 0.021 | zgc:174646         | zgc:174646                                                      |
| A_15_P632146 | ZDB-GENE-060315-3    | 0.644 | 0.004 | cnpy1              | canopy1                                                         |
| A_15_P105059 | ZDB-GENE-040426-2767 | 1.396 | 0.041 | zgc:56518          | zgc:56518                                                       |
| A_15_P112590 | ZDB-GENE-040426-1366 | 0.384 | 0     | zgc:64101          | zgc:64101                                                       |
| A_15_P176146 | ZDB-GENE-021115-8    | 1.413 | 0.016 | kars               | lysyl-tRNA synthetase                                           |
| A_15_P116044 | ZDB-GENE-040801-233  | 1.551 | 0.006 | zgc:92033          | zgc:92033                                                       |
| A_15_P705241 | NA                   | 2.137 | 0.001 | TC415610           | hypothetical LOC100151441                                       |
| A_15_P434245 | ZDB-GENE-060526-14   | 0.377 | 0.002 | antxr2a            | anthrax toxin receptor 2a                                       |
| A_15_P240721 | NA                   | 0.542 | 0.01  | EH491485           | olfactomedin related ER localized protein-like                  |
| A_15_P662771 | ZDB-GENE-040718-439  | 0.686 | 0.011 | cdc34b             | cell division cycle 34 homolog ( <i>S. cerevisiae</i> ) b       |
| A_15_P104846 | ZDB-GENE-040426-2826 | 0.55  | 0.037 | aqp3a              | aquaporin 3a                                                    |
| A_15_P174241 | ZDB-GENE-040426-2249 | 0.42  | 0.001 | oat                | organic anion transporter                                       |
| A_15_P320836 | ZDB-GENE-070410-90   | 1.759 | 0.002 | zgc:162630         | zgc:162630                                                      |
| A_15_P209336 | ZDB-GENE-040426-1164 | 2.398 | 0.001 | zgc:63566          | zgc:63566                                                       |
| A_15_P426375 | ZDB-GENE-041114-24   | 1.417 | 0.032 | rpia               | ribose 5-phosphate isomerase A (ribose 5-phosphate epimerase)   |
| A_15_P118163 | ZDB-GENE-081002-4    | 1.335 | 0.038 | ENSDART00000043823 | oxysterol binding protein-like 10                               |
| A_15_P116729 | ZDB-GENE-030709-1    | 0.723 | 0.025 | slc34a2b           | solute carrier family 34 (sodium phosphate), member 2b          |
| A_15_P179791 | ZDB-GENE-980526-372  | 0.626 | 0.017 | pou3f1             | POU class 3 homeobox 1                                          |
| A_15_P114250 | ZDB-GENE-040426-1837 | 1.984 | 0.021 | zgc:77419          | zgc:77419                                                       |
| A_15_P100952 | ZDB-GENE-000607-75   | 1.99  | 0.001 | noc2l              | nucleolar complex associated 2 homolog ( <i>S. cerevisiae</i> ) |
| A_15_P261686 | ZDB-GENE-051113-116  | 2.183 | 0.004 | zgc:122989         | zgc:122989                                                      |
| A_15_P119127 | ZDB-GENE-040718-19   | 0.494 | 0     | tspan13a           | tetraspanin 13a                                                 |
| A_15_P743291 | ZDB-GENE-030131-1862 | 0.647 | 0.005 | fign1              | fidgetin-like 1                                                 |
| A_15_P569267 | ZDB-GENE-060503-458  | 1.502 | 0.017 | si:dkey-78k11.1    | si:dkey-78k11.1                                                 |
| A_15_P120463 | ZDB-GENE-031030-13   | 1.563 | 0.011 | ngdn               | neuroguidin, EIF4E binding protein                              |
| A_15_P221641 | ZDB-GENE-030131-879  | 0.575 | 0.012 | pdip5              | protein disulfide isomerase-related protein (provisional)       |
| A_15_P199276 | ZDB-GENE-010724-4    | 0.529 | 0.002 | mpz                | myelin protein zero                                             |

|              |                      |        |       |                    |                                                                                                                            |
|--------------|----------------------|--------|-------|--------------------|----------------------------------------------------------------------------------------------------------------------------|
| A_15_P112575 | ZDB-GENE-040426-1205 | 1.405  | 0.042 | xpa                | xeroderma pigmentosum, complementation group A                                                                             |
| A_15_P178361 | ZDB-GENE-050622-16   | 0.632  | 0.039 | ENSDART00000099868 | kinesin family member 15                                                                                                   |
| A_15_P134496 | ZDB-GENE-040707-1    | 0.567  | 0.03  | irx1a              | iroquois homeobox protein 1, a                                                                                             |
| A_15_P175281 | ZDB-GENE-030131-3809 | 1.52   | 0.007 | src                | v-src sarcoma (Schmidt-Ruppin A-2) viral oncogene homolog (avian)                                                          |
| A_15_P176426 | NA                   | 1.47   | 0.013 | naa15b             | N(alpha)-acetyltransferase 15, NatA auxiliary subunit b, NMDA receptor-regulated gene 1b-like                              |
| A_15_P556817 | NA                   | 0.686  | 0.028 | LOC558937          | DEAD/H (Asp-Glu-Ala-Asp/His) box polypeptide 32-like                                                                       |
| A_15_P113817 | ZDB-GENE-030131-7880 | 0.615  | 0.023 | osgep              | O-sialoglycoprotein endopeptidase                                                                                          |
| A_15_P132566 | ZDB-GENE-040625-107  | 1.422  | 0.015 | arpc3              | actin related protein 2/3 complex, subunit 3                                                                               |
| A_15_P629511 | ZDB-GENE-051113-108  | 15.047 | 0     | zgc:123272         | zgc:123272                                                                                                                 |
| A_15_P114620 | ZDB-GENE-030131-5511 | 0.72   | 0.02  | nasp               | nuclear autoantigenic sperm protein (histone-binding)                                                                      |
| A_15_P594442 | NA                   | 0.671  | 0.013 | ENSDART00000112589 | ephrin-A2-like                                                                                                             |
| A_15_P119865 | NA                   | 0.669  | 0.012 | LOC325449          | kinesin family member 20A                                                                                                  |
| A_15_P631166 | ZDB-GENE-060825-174  | 1.566  | 0.03  | zgc:153393         | zgc:153393                                                                                                                 |
| A_15_P490977 | ZDB-GENE-030131-3788 | 0.747  | 0.036 | si:ch73-70k4.1     | si:ch73-70k4.1                                                                                                             |
| A_15_P706866 | ZDB-GENE-090312-218  | 1.695  | 0.05  | wu:fd21c10         | si:ch73-90k17.1                                                                                                            |
| A_15_P196601 | NA                   | 0.705  | 0.034 | LOC565785          | proline racemase-like                                                                                                      |
| A_15_P188566 | NA                   | 3.7    | 0     | LOC100006599       | meteorin-like protein-like                                                                                                 |
| A_15_P630381 | ZDB-GENE-050309-170  | 1.737  | 0.025 | zgc:165635         | zgc:165635                                                                                                                 |
| A_15_P107983 | ZDB-GENE-040426-1703 | 1.535  | 0.025 | fhit               | fragile histidine triad gene                                                                                               |
| A_15_P240487 | NA                   | 1.516  | 0.032 | LOC566640          | solute carrier family 22 member 1-like                                                                                     |
| A_15_P461525 | ZDB-GENE-041114-103  | 0.476  | 0.005 | zgc:101780         | zgc:101780                                                                                                                 |
| A_15_P206191 | ZDB-GENE-050417-276  | 2.274  | 0.004 | zgc:112519         | zgc:112519                                                                                                                 |
| A_15_P106440 | ZDB-GENE-000616-3    | 1.769  | 0.004 | caspa              | caspase a                                                                                                                  |
| A_15_P131056 | ZDB-GENE-060503-585  | 1.67   | 0.033 | slc5a5             | solute carrier family 5 (sodium iodide symporter), member 5                                                                |
| A_15_P685616 | ZDB-GENE-090312-196  | 1.626  | 0.044 | TC386153           | collagen, type XIX, alpha 1                                                                                                |
| A_15_P668351 | ZDB-GENE-030131-1665 | 0.691  | 0.015 | wdhd1              | WD repeat and HMG-box DNA binding protein 1                                                                                |
| A_15_P121473 | ZDB-GENE-041014-359  | 1.618  | 0.029 | flvcr1             | feline leukemia virus subgroup C cellular receptor 1                                                                       |
| A_15_P753227 | NA                   | 0.523  | 0.001 | si:busm1-118j2.5   | si:busm1-118j2.5, hemoglobin beta embryonic-1.1, similar to embryonic 1 beta-globin, embryonic 1 beta-globin family member |
| A_15_P160861 | ZDB-GENE-061013-5    | 1.8    | 0.003 | metap2l            | methionyl aminopeptidase 2 like                                                                                            |
| A_15_P725601 | ZDB-GENE-020507-3    | 0.62   | 0.002 | vangl2             | vang-like 2 (van gogh, Drosophila)                                                                                         |

|              |                      |       |       |                     |                                                                                               |
|--------------|----------------------|-------|-------|---------------------|-----------------------------------------------------------------------------------------------|
| A_15_P746186 | ZDB-GENE-040426-2898 | 0.451 | 0.001 | ccni                | cyclin I                                                                                      |
| A_15_P135211 | ZDB-GENE-050208-312  | 1.576 | 0.007 | zgc:194819          | zgc:194819                                                                                    |
| A_15_P119274 | ZDB-GENE-990415-50   | 0.631 | 0.008 | dlx4b               | distal-less homeobox gene 4b                                                                  |
| A_15_P654996 | ZDB-GENE-070426-1    | 6.221 | 0.003 | ghrh                | growth hormone releasing hormone                                                              |
| A_15_P162956 | ZDB-GENE-050417-368  | 1.408 | 0.045 | zgc:110197          | zgc:110197                                                                                    |
| A_15_P766446 | ZDB-GENE-061009-11   | 1.445 | 0.024 | si:ch211-217k17.7   | si:ch211-217k17.7                                                                             |
| A_15_P736876 | ZDB-GENE-050522-145  | 0.515 | 0.004 | marcksa             | myristoylated alanine rich protein kinase C substrate a                                       |
| A_15_P151971 | ZDB-GENE-050306-44   | 1.74  | 0.003 | ywhae2              | tyrosine 3-monooxygenase/tryptophan 5-monooxygenase activation protein, epsilon polypeptide 2 |
| A_15_P300741 | ZDB-GENE-080225-18   | 0.419 | 0.013 | TC377862            | si:dkey-205h13.2                                                                              |
| A_15_P236096 | ZDB-GENE-080102-1    | 0.627 | 0.007 | sh2d3ca             | SH2 domain containing 3Ca                                                                     |
| A_15_P343825 | ZDB-GENE-031110-4    | 0.677 | 0.021 | tubb5               | tubulin, beta 5                                                                               |
| A_15_P507057 | ZDB-GENE-040426-2942 | 0.728 | 0.028 | creb3l3l            | cAMP responsive element binding protein 3-like 3 like                                         |
| A_15_P153806 | ZDB-GENE-070410-99   | 0.622 | 0.031 | si:dkey-170e5.1     | replication factor C (activator 1) 1                                                          |
| A_15_P120325 | ZDB-GENE-030131-8043 | 1.984 | 0.002 | trim9               | tripartite motif-containing 9                                                                 |
| A_15_P664741 | ZDB-GENE-081028-19   | 1.574 | 0.023 | si:dkey-177p5.2     | si:dkey-177p5.2                                                                               |
| A_15_P113221 | NA                   | 1.394 | 0.023 | LOC564528           | similar to inositol 1,4,5-trisphosphate 3-kinase A                                            |
| A_15_P405855 | ZDB-GENE-070912-407  | 0.692 | 0.007 | si:dkey-18l1.1      | si:dkey-18l1.1                                                                                |
| A_15_P758639 | NA                   | 8.241 | 0     | NP13327258          | si:dkey-264b2.3, Gag-Pol polyprotein-like                                                     |
| A_15_P751191 | ZDB-GENE-010131-8    | 0.708 | 0.021 | ctsd                | cathepsin D                                                                                   |
| A_15_P655981 | ZDB-GENE-040308-1    | 1.63  | 0.012 | traf4a              | tnf receptor-associated factor 4a                                                             |
| A_15_P145746 | NA                   | 1.769 | 0.001 | LOC561321           | novel protein similar to vertebrate LAS1-like ( <i>S. cerevisiae</i> ) (LAS1L)                |
| A_15_P772746 | NA                   | 1.369 | 0.021 | TC390346            | transient receptor potential cation channel, subfamily M, member 4-like                       |
| A_15_P449745 | NA                   | 1.82  | 0.001 | EH442016            | zinc finger protein 37 homolog                                                                |
| A_15_P114779 | ZDB-GENE-050201-3    | 0.476 | 0.001 | fgfr1b              | fibroblast growth factor receptor-like 1b                                                     |
| A_15_P113290 | ZDB-GENE-030131-7662 | 0.721 | 0.039 | dfna5               | deafness, autosomal dominant 5                                                                |
| A_15_P737476 | ZDB-GENE-081104-75   | 0.68  | 0.024 | si:ch1073-192f24.1  | si:ch1073-192f24.1                                                                            |
| A_15_P741001 | ZDB-GENE-041008-25   | 1.565 | 0.012 | si:ch211-105d11.3   | si:ch211-105d11.3                                                                             |
| A_15_P659791 | ZDB-GENE-030131-7191 | 1.723 | 0.004 | si:dkey-9a20.6      | si:dkey-9a20.6                                                                                |
| A_15_P569932 | NA                   | 0.716 | 0.022 | ENSDART00000003511  | lethal giant larvae homolog 1-like                                                            |
| A_15_P155931 | ZDB-GENE-060810-52   | 0.607 | 0.002 | ENSDART000000031308 | SH3 and PX domains 2B                                                                         |



|              |                      |       |       |                    |                                                                                                                             |
|--------------|----------------------|-------|-------|--------------------|-----------------------------------------------------------------------------------------------------------------------------|
| A_15_P111324 | ZDB-GENE-040426-2910 | 1.603 | 0.02  | gyg1               | glycogenin 1                                                                                                                |
| A_15_P521542 | ZDB-GENE-090427-2    | 1.983 | 0.001 | pcsk1nl            | proprotein convertase subtilisin/kexin type 1 inhibitor, like                                                               |
| A_15_P163121 | ZDB-GENE-060503-863  | 1.848 | 0.013 | si:ch211-191i18.3  | si:ch211-191i18.3                                                                                                           |
| A_15_P159646 | ZDB-GENE-030131-4120 | 0.69  | 0.024 | TC367187           | myeloid/lymphoid or mixed-lineage leukemia 5 (trithorax homolog, Drosophila)                                                |
| A_15_P141291 | ZDB-GENE-050208-347  | 0.632 | 0.021 | si:dkeyp-31e2.1    | si:dkeyp-31e2.1                                                                                                             |
| A_15_P577542 | NA                   | 0.594 | 0.032 | ENSDART00000091388 | cyclin-dependent kinase inhibitor 2D-like                                                                                   |
| A_15_P101452 | ZDB-GENE-021028-1    | 2.074 | 0.002 | npm1               | nucleophosmin 1                                                                                                             |
| A_15_P669721 | ZDB-GENE-020228-2    | 0.674 | 0.024 | sall1a             | sal-like 1a (Drosophila)                                                                                                    |
| A_15_P176561 | ZDB-GENE-050417-209  | 6.365 | 0.049 | gpd1a              | glycerol-3-phosphate dehydrogenase 1a                                                                                       |
| A_15_P648291 | NA                   | 1.489 | 0.021 | fcer1gl            | Fc receptor, IgE, high affinity I, gamma polypeptide like, similar to homologue of high affinity IgE receptor gamma subunit |
| A_15_P671796 | NA                   | 0.614 | 0.015 | EE700521           | poly (ADP-ribose) polymerase family, member 14-like                                                                         |
| A_15_P110051 | ZDB-GENE-050306-42   | 1.391 | 0.031 | bmp6               | bone morphogenetic protein 6                                                                                                |
| A_15_P756571 | ZDB-GENE-030131-5968 | 1.513 | 0.043 | si:dkeyp-50f7.2    | si:dkeyp-50f7.2                                                                                                             |
| A_15_P206396 | ZDB-GENE-040426-1236 | 1.58  | 0.007 | pdcd2              | programmed cell death 2                                                                                                     |
| A_15_P150751 | ZDB-GENE-061027-67   | 1.763 | 0.004 | mylipb             | myosin regulatory light chain interacting protein b                                                                         |
| A_15_P103985 | ZDB-GENE-041114-160  | 1.558 | 0.026 | nsfl1c             | NSFL1 (p97) cofactor (p47)                                                                                                  |
| A_15_P160787 | ZDB-GENE-060818-9    | 1.468 | 0.02  | zgc:152698         | zgc:152698                                                                                                                  |
| A_15_P282341 | ZDB-GENE-030131-9116 | 1.679 | 0.005 | cpn1               | carboxypeptidase N, polypeptide 1                                                                                           |
| A_15_P195966 | ZDB-GENE-080813-1    | 1.826 | 0.008 | dmrt2b             | doublesex and mab-3 related transcription factor 2b                                                                         |
| A_15_P103237 | ZDB-GENE-030131-1269 | 0.68  | 0.016 | uqcrc2             | ubiquinol-cytochrome c reductase core protein II                                                                            |
| A_15_P763036 | NA                   | 1.653 | 0.012 | NP13316601         | neurotrophic factor artemin-like                                                                                            |
| A_15_P228656 | ZDB-GENE-040426-1152 | 0.621 | 0.013 | asl                | argininosuccinate lyase                                                                                                     |
| A_15_P621116 | ZDB-GENE-040426-703  | 1.418 | 0.034 | dcaf13             | ddb1 and cul4 associated factor 13                                                                                          |
| A_15_P164911 | NA                   | 1.736 | 0.008 | LOC100006971       | mouse RING finger 1-like                                                                                                    |
| A_15_P115942 | ZDB-GENE-040426-1457 | 0.719 | 0.026 | shox2              | short stature homeobox 2                                                                                                    |
| A_15_P172146 | ZDB-GENE-050208-426  | 2.066 | 0.007 | si:dkey-121a9.3    | si:dkey-121a9.3                                                                                                             |
| A_15_P166471 | NA                   | 0.692 | 0.03  | LOC563403          | hypothetical LOC563403                                                                                                      |
| A_15_P178171 | ZDB-GENE-050517-21   | 1.814 | 0.006 | ENSDART00000089354 | UDP-glucose glycoprotein glucosyltransferase 2                                                                              |
| A_15_P719776 | ZDB-GENE-040927-6    | 0.628 | 0.041 | cnot3a             | CCR4-NOT transcription complex, subunit 3a                                                                                  |
| A_15_P176291 | ZDB-GENE-050417-400  | 3.173 | 0.013 | zgc:110152         | zgc:110152                                                                                                                  |

|              |                      |       |       |                    |                                                                          |
|--------------|----------------------|-------|-------|--------------------|--------------------------------------------------------------------------|
| A_15_P633826 | ZDB-GENE-060825-1    | 1.972 | 0.027 | cyp24a11           | cytochrome P450, family 24, subfamily A, polypeptide 1, like             |
| A_15_P106086 | ZDB-GENE-060810-7    | 0.323 | 0.015 | cry11              | crystallin, lambda 1                                                     |
| A_15_P205116 | ZDB-GENE-040801-89   | 0.539 | 0     | mfsd2ab            | major facilitator superfamily domain containing 2ab                      |
| A_15_P542867 | ZDB-GENE-030131-6611 | 0.706 | 0.042 | wu:fk48d07         | wu:fk48d07                                                               |
| A_15_P634361 | ZDB-GENE-070410-44   | 1.964 | 0.002 | zgc:162229         | zgc:162229                                                               |
| A_15_P113448 | ZDB-GENE-040718-107  | 0.492 | 0.042 | cryba1a            | crystallin, beta A1a                                                     |
| A_15_P460945 | ZDB-GENE-990415-128  | 1.827 | 0.007 | six3b              | sine oculis homeobox homolog 3b                                          |
| A_15_P116538 | ZDB-GENE-030425-4    | 0.717 | 0.021 | ppm1g              | protein phosphatase 1G (formerly 2C), magnesium-dependent, gamma isoform |
| A_15_P189441 | ZDB-GENE-081105-138  | 1.66  | 0.015 | si:ch211-163l21.10 | si:ch211-163l21.10                                                       |
| A_15_P628516 | ZDB-GENE-030819-1    | 0.636 | 0.012 | tp63               | tumor protein p63                                                        |
| A_15_P143336 | ZDB-GENE-061013-567  | 0.657 | 0.003 | zgc:153675         | zgc:153675                                                               |
| A_15_P157996 | ZDB-GENE-040426-2110 | 1.519 | 0.035 | znf259             | zinc finger protein 259                                                  |
| A_15_P115043 | ZDB-GENE-990415-159  | 0.417 | 0.036 | mt                 | metallothionein                                                          |
| A_15_P156946 | ZDB-GENE-070216-1    | 0.464 | 0.007 | otpa               | orthopedia homolog a                                                     |
| A_15_P404620 | ZDB-GENE-090313-7    | 1.568 | 0.017 | si:ch211-103i6.5   | si:ch211-103i6.5                                                         |
| A_15_P204571 | NA                   | 1.426 | 0.014 | LOC569134          | similar to socius                                                        |
| A_15_P738483 | ZDB-GENE-020419-9    | 0.759 | 0.03  | slc25a5            | solute carrier family 25 alpha, member 5                                 |
| A_15_P220881 | ZDB-GENE-050522-117  | 0.614 | 0.012 | zgc:110008         | zgc:110008                                                               |
| A_15_P718821 | ZDB-GENE-030131-9975 | 0.656 | 0.042 | dact2              | dapper homolog 2, antagonist of beta-catenin (xenopus)                   |
| A_15_P104309 | ZDB-GENE-030131-6564 | 0.394 | 0     | ap2b1              | adaptor-related protein complex 2, beta 1 subunit                        |
| A_15_P441875 | ZDB-GENE-030131-1072 | 0.279 | 0.013 | comtd1             | catechol-O-methyltransferase domain containing 1                         |
| A_15_P637271 | ZDB-GENE-040426-1283 | 1.426 | 0.04  | minal              | MYC induced nuclear antigen-like                                         |
| A_15_P105302 | ZDB-GENE-051127-19   | 0.584 | 0.028 | thnsl2             | threonine synthase-like 2 (S. cerevisiae)                                |
| A_15_P738216 | ZDB-GENE-040625-2    | 1.755 | 0.012 | cyp51              | cytochrome P450, family 51                                               |
| A_15_P392570 | NA                   | 2.033 | 0.02  | TC402018           | hypothetical LOC100148510                                                |
| A_15_P630396 | ZDB-GENE-071004-98   | 1.822 | 0.044 | zgc:171801         | zgc:171801                                                               |
| A_15_P166331 | ZDB-GENE-040426-1138 | 1.748 | 0.045 | zgc:63504          | zgc:63504                                                                |
| A_15_P160451 | ZDB-GENE-080204-123  | 1.5   | 0.025 | zgc:175264         | zgc:175264                                                               |
| A_15_P148911 | ZDB-GENE-060610-3    | 1.44  | 0.023 | crb3b              | crumbs homolog 3b                                                        |
| A_15_P460240 | NA                   | 0.504 | 0.005 | LOC567883          | NOD-like receptor C                                                      |

|              |                                          |       |       |                   |                                                                    |
|--------------|------------------------------------------|-------|-------|-------------------|--------------------------------------------------------------------|
| A_15_P102431 | ZDB-GENE-030131-3973                     | 1.622 | 0.022 | si:ch211-89p1.3   | si:ch211-89p1.3                                                    |
| A_15_P140941 | ZDB-GENE-030128-4                        | 0.592 | 0.012 | smad3b            | MAD, mothers against decapentaplegic homolog 3b (Drosophila)       |
| A_15_P164461 | ZDB-GENE-011015-1                        | 1.356 | 0.04  | smad6a            | SMAD family member 6a                                              |
| A_15_P597917 | ZDB-GENE-030131-8455                     | 1.381 | 0.027 | wu:fb53c12        | wu:fb12c09                                                         |
| A_15_P147416 | ZDB-GENE-070705-490                      | 1.911 | 0.011 | si:dkey-711l.7    | si:dkey-711l.7                                                     |
| A_15_P673816 | ZDB-GENE-061027-365                      | 1.776 | 0.006 | zgc:153665        | zgc:153665                                                         |
| A_15_P661821 | ZDB-GENE-040718-21                       | 2.374 | 0.006 | zgc:100799        | zgc:100799                                                         |
| A_15_P620716 | ZDB-GENE-050320-45                       | 2.724 | 0.001 | rpp30             | ribonuclease P/MRP 30 subunit                                      |
| A_15_P626481 | ZDB-GENE-030911-2,<br>ZDB-GENE-080218-30 | 1.602 | 0.03  | gstm              | glutathione S-transferase M, zgc:173994                            |
| A_15_P102850 | ZDB-GENE-010410-3                        | 0.574 | 0.021 | glra4a            | glycine receptor, alpha 4a                                         |
| A_15_P194921 | ZDB-GENE-050522-480                      | 0.665 | 0.012 | zgc:110708        | zgc:110708                                                         |
| A_15_P520262 | ZDB-GENE-030131-4983                     | 1.681 | 0.001 | TC387324          | si:ch211-113p18.3                                                  |
| A_15_P530082 | ZDB-GENE-980526-115                      | 0.645 | 0.024 | nr2f1a            | nuclear receptor subfamily 2, group F, member 1a                   |
| A_15_P179576 | ZDB-GENE-071004-39                       | 1.408 | 0.05  | zgc:171784        | zgc:171784                                                         |
| A_15_P626246 | ZDB-GENE-041114-120                      | 1.749 | 0.006 | glmna             | glomulin, FKBP associated protein a                                |
| A_15_P750531 | ZDB-GENE-020322-1                        | 12.15 | 0     | ccng1             | cyclin G1                                                          |
| A_15_P520547 | ZDB-GENE-030722-10                       | 0.715 | 0.045 | brd8              | bromodomain containing 8                                           |
| A_15_P204051 | ZDB-GENE-040426-1274                     | 2.282 | 0     | sox4b             | SRY-box containing gene 4b                                         |
| A_15_P104882 | ZDB-GENE-071004-82                       | 0.631 | 0.018 | mpp2a             | membrane protein, palmitoylated 2a (MAGUK p55 subfamily member 2a) |
| A_15_P396715 | ZDB-GENE-080204-81                       | 0.594 | 0.002 | zgc:175098        | zgc:175098                                                         |
| A_15_P633346 | ZDB-GENE-060825-97                       | 1.62  | 0.021 | wnt9a             | wingless-type MMTV integration site family, member 9A              |
| A_15_P109334 | ZDB-GENE-040625-174                      | 2.316 | 0     | idh3b             | isocitrate dehydrogenase 3 (NAD+) beta                             |
| A_15_P113027 | ZDB-GENE-050517-5                        | 0.684 | 0.011 | abca5             | ATP-binding cassette, sub-family A (ABC1), member 5                |
| A_15_P173801 | ZDB-GENE-060929-1194                     | 0.51  | 0.001 | minpp1a           | multiple inositol polyphosphate histidine phosphatase, 1a          |
| A_15_P397990 | NA                                       | 1.549 | 0.039 | LOC561535         | p53 target zinc finger protein-like                                |
| A_15_P108747 | ZDB-GENE-020213-2                        | 1.455 | 0.022 | mkrn2             | makorin, ring finger protein, 2                                    |
| A_15_P632756 | ZDB-GENE-030131-8118                     | 0.69  | 0.019 | wu:fj53g11        | wu:fj53g11                                                         |
| A_15_P188416 | ZDB-GENE-061207-21                       | 1.952 | 0.001 | si:ch211-217k17.9 | si:ch211-217k17.9                                                  |
| A_15_P349350 | NA                                       | 1.36  | 0.044 | EG587873          | hypothetical protein LOC100332245                                  |
| A_15_P194976 | ZDB-GENE-030219-89                       | 0.607 | 0.025 | si:ch211-15i6.4   | si:ch211-15i6.4                                                    |

|              |                      |       |       |                    |                                                                                          |
|--------------|----------------------|-------|-------|--------------------|------------------------------------------------------------------------------------------|
| A_15_P100384 | ZDB-GENE-040426-2012 | 0.597 | 0.002 | wdr24              | WD repeat domain 24                                                                      |
| A_15_P119817 | ZDB-GENE-051127-39   | 0.598 | 0.034 | actn2              | actinin, alpha 2                                                                         |
| A_15_P120591 | ZDB-GENE-050417-440  | 1.514 | 0.023 | chrna5             | cholinergic receptor, nicotinic, alpha 5                                                 |
| A_15_P755986 | ZDB-GENE-030131-1007 | 1.309 | 0.05  | prkar2aa           | protein kinase, cAMP-dependent, regulatory, type II, alpha A                             |
| A_15_P136386 | NA                   | 0.672 | 0.046 | LOC798958          | solute carrier family 23 member 2-like                                                   |
| A_15_P624261 | ZDB-GENE-031114-2    | 0.529 | 0.003 | fam60al            | family with sequence similarity 60, member A, like                                       |
| A_15_P331464 | ZDB-GENE-990712-15   | 0.684 | 0.018 | mylz2              | myosin, light polypeptide 2, skeletal muscle                                             |
| A_15_P258736 | ZDB-GENE-080226-7    | 0.54  | 0.01  | sc:d0139           | sc:d0139                                                                                 |
| A_15_P662261 | ZDB-GENE-070928-7    | 1.464 | 0.041 | zgc:171223         | zgc:171223                                                                               |
| A_15_P729496 | ZDB-GENE-070410-122  | 0.425 | 0     | zgc:162985         | zgc:162985                                                                               |
| A_15_P117723 | ZDB-GENE-001106-1    | 1.989 | 0.001 | wnt3a              | wingless-type MMTV integration site family, member 3A                                    |
| A_15_P157076 | NA                   | 0.492 | 0.004 | ENSDART00000086091 | pleckstrin homology domain containing, family A member 5-like                            |
| A_15_P100080 | ZDB-GENE-060526-218  | 1.467 | 0.032 | si:dkey-170o10.3   | si:dkey-170o10.3                                                                         |
| A_15_P731931 | ZDB-GENE-030131-106  | 0.65  | 0.047 | ctsl1a             | cathepsin L, 1 a                                                                         |
| A_15_P206661 | ZDB-GENE-050417-67   | 1.668 | 0.013 | zgc:110288         | zgc:110288                                                                               |
| A_15_P205466 | ZDB-GENE-011128-11   | 1.52  | 0.048 | gnat1              | guanine nucleotide binding protein (G protein), alpha transducing activity polypeptide 1 |
| A_15_P152641 | ZDB-GENE-050522-271  | 1.535 | 0.014 | zgc:112038         | zgc:112038                                                                               |
| A_15_P287321 | ZDB-GENE-080723-23   | 1.988 | 0.002 | zgc:195096         | sine oculis-related homeobox 2b                                                          |
| A_15_P592022 | ZDB-GENE-030825-3    | 0.587 | 0.006 | casp2              | caspase 2, apoptosis-related cysteine protease                                           |
| A_15_P428975 | ZDB-GENE-060503-399  | 0.642 | 0.032 | si:ch211-204a13.4  | si:ch211-204a13.4                                                                        |
| A_15_P113754 | ZDB-GENE-040426-853  | 1.456 | 0.009 | kdsr               | 3-ketodihydrosphingosine reductase                                                       |
| A_15_P491347 | NA                   | 0.371 | 0     | TC381502           | solute carrier family 23 (nucleobase transporters), member 3-like                        |
| A_15_P110154 | ZDB-GENE-030131-6305 | 0.683 | 0.01  | fbxw11a            | F-box and WD-40 domain protein 11a                                                       |
| A_15_P665391 | ZDB-GENE-030131-9100 | 1.705 | 0.002 | wu:fa99c08         | wu:fa99c08                                                                               |
| A_15_P658921 | ZDB-GENE-030131-2165 | 0.697 | 0.025 | nfyc               | nuclear transcription factor Y, gamma                                                    |
| A_15_P118181 | ZDB-GENE-990714-21   | 0.365 | 0     | tpsn               | tapasin                                                                                  |
| A_15_P171976 | ZDB-GENE-040718-184  | 0.683 | 0.043 | zgc:92869          | zgc:92869                                                                                |
| A_15_P408895 | NA                   | 0.502 | 0.029 | adcy5              | adenylate cyclase 5, adenylate cyclase type 5-like                                       |
| A_15_P152276 | ZDB-GENE-050522-323  | 1.445 | 0.026 | zgc:110270         | zgc:110270                                                                               |
| A_15_P113925 | ZDB-GENE-081105-47   | 1.493 | 0.006 | si:dkey-208b23.1   | si:dkey-208b23.1                                                                         |

|              |                      |        |       |                    |                                                                                     |
|--------------|----------------------|--------|-------|--------------------|-------------------------------------------------------------------------------------|
| A_15_P637921 | ZDB-GENE-021115-1    | 0.673  | 0.015 | slc11a2            | solute carrier family 11 (proton-coupled divalent metal ion transporters), member 2 |
| A_15_P197536 | ZDB-GENE-000502-1    | 0.678  | 0.029 | bmpr1aa            | bone morphogenetic protein receptor, type 1aa                                       |
| A_15_P107988 | ZDB-GENE-041111-162  | 0.627  | 0.01  | gli3               | GLI-Kruppel family member GLI3                                                      |
| A_15_P121352 | ZDB-GENE-030131-4656 | 0.666  | 0.021 | tmem9b             | TMEM9 domain family, member B                                                       |
| A_15_P664856 | ZDB-GENE-060421-2909 | 2.236  | 0.005 | LOC553478          | hypothetical protein LOC553478, zgc:136360                                          |
| A_15_P117965 | ZDB-GENE-040426-1816 | 0.644  | 0.019 | rgl1               | ral guanine nucleotide dissociation stimulator-like 1                               |
| A_15_P382670 | ZDB-GENE-060331-65   | 14.086 | 0     | zgc:136826         | zgc:136826                                                                          |
| A_15_P291216 | ZDB-GENE-070821-2    | 1.611  | 0.032 | cldn17             | claudin 17                                                                          |
| A_15_P496867 | ZDB-GENE-050506-144  | 0.624  | 0.032 | si:ch211-134j6.3   | si:ch211-134j6.3                                                                    |
| A_15_P118187 | ZDB-GENE-040724-45   | 1.595  | 0.013 | si:busm1-122b7.1   | si:busm1-122b7.1                                                                    |
| A_15_P106734 | ZDB-GENE-040426-2281 | 0.251  | 0     | zgc:77778          | zgc:77778                                                                           |
| A_15_P165516 | ZDB-GENE-070119-4    | 4.755  | 0     | bbc3               | BCL2 binding component 3                                                            |
| A_15_P147276 | ZDB-GENE-081022-111  | 0.543  | 0.013 | zgc:194398         | zgc:194398                                                                          |
| A_15_P110609 | ZDB-GENE-030131-478  | 0.672  | 0.006 | ndufs1             | NADH dehydrogenase (ubiquinone) Fe-S protein 1                                      |
| A_15_P271851 | ZDB-GENE-030131-4084 | 1.493  | 0.034 | wu:fc69a03         | wu:fc69a03                                                                          |
| A_15_P650976 | ZDB-GENE-070424-54   | 0.688  | 0.021 | ptpro              | protein tyrosine phosphatase, receptor type, O                                      |
| A_15_P105470 | ZDB-GENE-040426-1097 | 0.72   | 0.015 | tmem57a            | transmembrane protein 57a                                                           |
| A_15_P164231 | ZDB-GENE-040718-379  | 1.346  | 0.025 | nipal3             | NIPA-like domain containing 3                                                       |
| A_15_P105247 | ZDB-GENE-030131-4174 | 0.361  | 0.012 | mt2                | metallothionein 2                                                                   |
| A_15_P722411 | ZDB-GENE-040426-1798 | 0.549  | 0.025 | zgc:77155          | zgc:77155                                                                           |
| A_15_P702681 | ZDB-GENE-081105-28   | 1.432  | 0.027 | si:ch211-286e11.3  | si:ch211-286e11.3                                                                   |
| A_15_P109571 | ZDB-GENE-040704-22   | 0.647  | 0.033 | cdc42ep4a          | CDC42 effector protein (Rho GTPase binding) 4a                                      |
| A_15_P100235 | ZDB-GENE-050522-45   | 1.436  | 0.036 | zgc:110621         | serine/threonine/tyrosine interacting protein                                       |
| A_15_P444620 | NA                   | 0.521  | 0.013 | cplx3b             | complexin 3b                                                                        |
| A_15_P623461 | ZDB-GENE-041220-1    | 0.442  | 0     | tfr1a              | transferrin receptor 1a                                                             |
| A_15_P138161 | NA                   | 1.37   | 0.031 | frem1b             | Fras-related extracellular matrix protein 1b                                        |
| A_15_P101711 | ZDB-GENE-040801-116  | 0.677  | 0.04  | zgc:101017         | zgc:101017                                                                          |
| A_15_P720516 | ZDB-GENE-031030-3    | 1.564  | 0.027 | ddx49              | DEAD (Asp-Glu-Ala-Asp) box polypeptide 49                                           |
| A_15_P624581 | ZDB-GENE-000928-1    | 0.553  | 0.01  | fech               | ferrochelatase                                                                      |
| A_15_P521577 | NA                   | 0.666  | 0.044 | ENSDART00000110792 | hypothetical LOC100005957                                                           |

|              |                                            |        |       |                    |                                                                             |
|--------------|--------------------------------------------|--------|-------|--------------------|-----------------------------------------------------------------------------|
| A_15_P598827 | ZDB-GENE-030131-9857                       | 2.285  | 0.001 | ENSDART00000051724 | sb:cb474                                                                    |
| A_15_P171656 | ZDB-GENE-030911-7                          | 0.663  | 0.014 | disp1              | dispatched homolog 1 (Drosophila)                                           |
| A_15_P196106 | ZDB-GENE-040426-1214                       | 1.535  | 0.028 | cdc14aa            | CDC14 cell division cycle 14 homolog A (S. cerevisiae), a                   |
| A_15_P107533 | ZDB-GENE-040426-1664                       | 1.567  | 0.034 | pde6c              | phosphodiesterase 6C, cGMP-specific, cone, alpha prime                      |
| A_15_P226401 | ZDB-GENE-030131-9689                       | 0.432  | 0     | ccne2              | cyclin E2                                                                   |
| A_15_P193581 | ZDB-GENE-060825-247                        | 0.628  | 0.041 | zgc:153044         | zgc:153044                                                                  |
| A_15_P720451 | ZDB-GENE-051113-124                        | 1.815  | 0.004 | zgc:123267         | zgc:123267                                                                  |
| A_15_P312406 | NA                                         | 0.504  | 0.006 | LOC100007229       | novel immune type receptor-like                                             |
| A_15_P644014 | ZDB-GENE-050913-43                         | 1.355  | 0.033 | zgc:114140         | zgc:114140                                                                  |
| A_15_P163581 | ZDB-GENE-050320-129                        | 1.381  | 0.028 | nenf               | neuron derived neurotrophic factor                                          |
| A_15_P111326 | ZDB-GENE-030313-1                          | 1.557  | 0.012 | rapsn              | receptor-associated protein of the synapse, 43kD                            |
| A_15_P720816 | ZDB-GENE-040718-77                         | 1.735  | 0.007 | rbm34              | RNA binding motif protein 34                                                |
| A_15_P366290 | ZDB-GENE-030131-8405                       | 1.521  | 0.015 | zgc:101121         | zgc:101121                                                                  |
| A_15_P597342 | ZDB-GENE-041111-260                        | 0.506  | 0.046 | si:ch211-215h6.2   | si:ch211-215h6.2                                                            |
| A_15_P471995 | ZDB-GENE-060825-7                          | 0.656  | 0.016 | acsf2              | acyl-CoA synthetase family member 2                                         |
| A_15_P113738 | ZDB-GENE-040426-954                        | 1.34   | 0.049 | zgc:56235          | zgc:56235                                                                   |
| A_15_P210691 | ZDB-GENE-040426-1824                       | 1.5    | 0.008 | zgc:77358          | zgc:77358                                                                   |
| A_15_P175296 | ZDB-GENE-030131-7291                       | 1.563  | 0.011 | capsl              | calcyphosine-like                                                           |
| A_15_P101506 | ZDB-GENE-030131-6872                       | 0.602  | 0.012 | mdm4               | transformed 3T3 cell double minute 4 homolog (mouse)                        |
| A_15_P622946 | ZDB-GENE-080215-22,<br>ZDB-GENE-060503-612 | 1.64   | 0.009 | zgc:172014         | zgc:172014, si:dkey-106c17.2                                                |
| A_15_P103561 | NA                                         | 0.501  | 0.001 | wnt8-2             | wnt8-like protein 2                                                         |
| A_15_P242254 | NA                                         | 0.695  | 0.022 | LOC562592          | alpha 1,2-mannosidase-like                                                  |
| A_15_P141661 | ZDB-GENE-040928-1                          | 1.907  | 0.012 | hsd17b2            | hydroxysteroid (17-beta) dehydrogenase 2                                    |
| A_15_P375905 | ZDB-GENE-070112-352                        | 0.693  | 0.024 | zgc:158671         | zgc:158671                                                                  |
| A_15_P131466 | ZDB-GENE-990415-270                        | 12.64  | 0     | tp53               | tumor protein p53                                                           |
| A_15_P115439 | ZDB-GENE-030619-9                          | 1.934  | 0.005 | ctsc               | cathepsin C                                                                 |
| A_15_P115480 | ZDB-GENE-030131-271                        | 1.337  | 0.046 | smyhc1             | slow myosin heavy chain 1                                                   |
| A_15_P179736 | ZDB-GENE-060526-247                        | 16.257 | 0     | si:dkey-204l11.1   | si:dkey-204l11.1                                                            |
| A_15_P175891 | ZDB-GENE-050327-68                         | 1.404  | 0.046 | ikbkg              | inhibitor of kappa light polypeptide gene enhancer in B-cells, kinase gamma |
| A_15_P209716 | ZDB-GENE-990603-6                          | 0.741  | 0.034 | prim1              | primase polypeptide 1                                                       |

|              |                      |       |       |                    |                                                         |
|--------------|----------------------|-------|-------|--------------------|---------------------------------------------------------|
| A_15_P657186 | NA                   | 3.665 | 0.037 | LOC553462          | hypothetical protein LOC553462                          |
| A_15_P241988 | NA                   | 0.489 | 0.012 | NP13325781         | serine/threonine protein kinase pim-3-like              |
| A_15_P364120 | NA                   | 2.036 | 0.03  | ENSDART00000108578 | Cyclic nucleotide-gated cation channel-like             |
| A_15_P107365 | ZDB-GENE-040426-2273 | 0.633 | 0.032 | znf207a            | zinc finger protein 207, a                              |
| A_15_P720331 | ZDB-GENE-040426-2204 | 1.582 | 0.005 | sqstm1             | sequestosome 1                                          |
| A_15_P549587 | ZDB-GENE-041010-22   | 1.598 | 0.007 | glrx3              | glutaredoxin 3                                          |
| A_15_P140721 | ZDB-GENE-060503-273  | 0.729 | 0.035 | si:dkeyp-114f9.3   | si:dkeyp-114f9.3                                        |
| A_15_P662937 | ZDB-GENE-050417-267  | 0.582 | 0.015 | acta1a             | actin, alpha 1a, skeletal muscle                        |
| A_15_P109540 | ZDB-GENE-040718-12   | 1.51  | 0.025 | ebp                | emopamil binding protein (sterol isomerase)             |
| A_15_P149266 | ZDB-GENE-990415-267  | 0.67  | 0.035 | foxg1a             | forkhead box G1a                                        |
| A_15_P491237 | ZDB-GENE-070928-43   | 0.333 | 0     | zgc:174931         | zgc:174931                                              |
| A_15_P114882 | ZDB-GENE-990415-162  | 1.565 | 0.011 | myca               | myelocytomatosis oncogene a                             |
| A_15_P102524 | ZDB-GENE-040426-780  | 2.108 | 0     | mycb               | myelocytomatosis oncogene b                             |
| A_15_P558222 | NA                   | 3.447 | 0     | EH488776           | hypothetical LOC100150699                               |
| A_15_P113007 | NA                   | 1.594 | 0.004 | LOC555987          | janus kinase and microtubule interacting protein 1-like |
| A_15_P188926 | ZDB-GENE-070209-286  | 1.547 | 0.034 | fxn                | frataxin                                                |
| A_15_P156511 | NA                   | 0.533 | 0.005 | LOC555361          | villin 1-like                                           |
| A_15_P143386 | ZDB-GENE-060503-248  | 0.704 | 0.036 | si:dkey-222b8.1    | si:dkey-222b8.1                                         |
| A_15_P100172 | ZDB-GENE-030131-5378 | 0.511 | 0.002 | mynn               | myoneurin                                               |
| A_15_P585452 | ZDB-GENE-990415-164  | 1.397 | 0.028 | mef2d              | myocyte enhancer factor 2d                              |
| A_15_P309531 | NA                   | 0.692 | 0.018 | TC407700           | proprotein convertase subtilisin/kexin type 6-like      |
| A_15_P154196 | ZDB-GENE-051030-72   | 1.676 | 0.007 | atg10              | ATG10 autophagy related 10 homolog (S. cerevisiae)      |
| A_15_P116868 | ZDB-GENE-040120-7    | 2.039 | 0.002 | arpc5b             | actin related protein 2/3 complex, subunit 5B           |
| A_15_P117866 | ZDB-GENE-030131-9837 | 1.645 | 0.007 | wu:fi05d01         | ribosomal RNA processing 1 homolog (S. cerevisiae)      |
| A_15_P110632 | ZDB-GENE-030131-6851 | 1.324 | 0.039 | sh3glb1            | SH3-domain GRB2-like endophilin B1                      |
| A_15_P185966 | NA                   | 5.156 | 0     | LOC561988          | Probable G-protein coupled receptor-like                |
| A_15_P344837 | NA                   | 0.394 | 0.001 | lpin1              | lipin 1                                                 |
| A_15_P410100 | ZDB-GENE-070209-32   | 0.71  | 0.038 | zgc:158482         | zgc:158482                                              |
| A_15_P115570 | ZDB-GENE-040426-1849 | 1.934 | 0.016 | fkbp8              | FK506 binding protein 8                                 |
| A_15_P637321 | NA                   | 1.684 | 0.041 | LOC794616          | chemokine CCL-C10b                                      |

|              |                      |        |       |                    |                                                                       |
|--------------|----------------------|--------|-------|--------------------|-----------------------------------------------------------------------|
| A_15_P624606 | ZDB-GENE-040808-28   | 0.464  | 0.001 | ndufaf2            | NADH dehydrogenase (ubiquinone) 1 alpha subcomplex, assembly factor 2 |
| A_15_P654521 | ZDB-GENE-090710-4    | 0.59   | 0.026 | ENSDART00000057910 | neurogranin (protein kinase C substrate, RC3) a                       |
| A_15_P105609 | NA                   | 1.456  | 0.011 | LOC797799          | similar to serine protease, zgc:173425                                |
| A_15_P110063 | NA                   | 1.766  | 0.035 | ENSDART00000097340 | radial spokehead-like 1-like                                          |
| A_15_P101984 | ZDB-GENE-030131-9686 | 0.513  | 0.001 | ENSDART00000008197 | si:dkey-102m7.2                                                       |
| A_15_P120866 | ZDB-GENE-050522-338  | 0.7    | 0.035 | zgc:110231         | zgc:110231                                                            |
| A_15_P310861 | NA                   | 0.612  | 0.009 | ENSDART00000111137 | small conductance calcium-activated potassium channel protein 2-like  |
| A_15_P179731 | ZDB-GENE-031116-3    | 0.308  | 0.003 | zgc:158494         | zgc:158494                                                            |
| A_15_P115603 | ZDB-GENE-041210-170  | 0.674  | 0.041 | si:ch211-239e6.4   | si:ch211-239e6.4                                                      |
| A_15_P198046 | ZDB-GENE-030131-8198 | 2.019  | 0.012 | mtrf1l             | mitochondrial translational release factor 1-like                     |
| A_15_P724521 | ZDB-GENE-040718-350  | 2.202  | 0.018 | zgc:92287          | zgc:92287                                                             |
| A_15_P110425 | ZDB-GENE-050522-202  | 0.729  | 0.04  | zgc:112361         | zgc:112361                                                            |
| A_15_P201766 | ZDB-GENE-041008-117  | 6.619  | 0     | si:dkey-145p14.5   | si:dkey-145p14.5                                                      |
| A_15_P366045 | ZDB-GENE-030131-1205 | 3.322  | 0.002 | agt                | angiotensinogen                                                       |
| A_15_P632251 | ZDB-GENE-050327-14   | 1.376  | 0.038 | pvr13l             | poliovirus receptor-related 3 like                                    |
| A_15_P154976 | ZDB-GENE-040426-1891 | 1.548  | 0.029 | zgc:77852          | transmembrane protein 85                                              |
| A_15_P191066 | ZDB-GENE-070412-1    | 0.417  | 0.003 | ENSDART00000075278 | ATPase, (Na+)/K+ transporting, beta 4 polypeptide                     |
| A_15_P301246 | ZDB-GENE-050706-83   | 0.7    | 0.034 | ildr2              | immunoglobulin-like domain containing receptor 2                      |
| A_15_P103389 | ZDB-GENE-030131-9884 | 0.563  | 0.005 | cpox               | coproporphyrinogen oxidase                                            |
| A_15_P571932 | ZDB-GENE-990415-278  | 1.368  | 0.034 | wnt10a             | wingless-type MMTV integration site family, member 10a                |
| A_15_P176766 | ZDB-GENE-070719-7    | 0.588  | 0.042 | usp47              | ubiquitin specific peptidase 47                                       |
| A_15_P376280 | ZDB-GENE-061215-100  | 0.629  | 0.043 | zgc:158375         | zgc:158375                                                            |
| A_15_P101411 | ZDB-GENE-040801-142  | 1.421  | 0.012 | naa50              | N(alpha)-acetyltransferase 50, NatE catalytic subunit                 |
| A_15_P731681 | ZDB-GENE-050417-93   | 1.459  | 0.034 | wdr92              | WD repeat domain 92                                                   |
| A_15_P118741 | ZDB-GENE-040718-44   | 48.263 | 0     | rspo1              | R-spondin homolog (Xenopus laevis)                                    |
| A_15_P414260 | NA                   | 0.639  | 0.014 | TC380708           | Sp3-like                                                              |
| A_15_P419910 | ZDB-GENE-061103-88   | 1.903  | 0.044 | zgc:154042         | zgc:154042                                                            |
| A_15_P346845 | ZDB-GENE-030131-4678 | 2.841  | 0     | rpz5               | rapunzel 5                                                            |
| A_15_P172901 | ZDB-GENE-050522-402  | 1.581  | 0.012 | zgc:110020         | zgc:110020                                                            |
| A_15_P677646 | ZDB-GENE-050320-19   | 1.346  | 0.038 | mrpl10             | mitochondrial ribosomal protein L10                                   |



|              |                      |       |       |                    |                                                                                       |
|--------------|----------------------|-------|-------|--------------------|---------------------------------------------------------------------------------------|
| A_15_P652856 | ZDB-GENE-990714-11   | 4.883 | 0     | fsta               | follistatin a                                                                         |
| A_15_P164516 | ZDB-GENE-070424-16   | 0.673 | 0.036 | zgc:158449         | zgc:158449                                                                            |
| A_15_P634301 | ZDB-GENE-050327-47   | 1.293 | 0.045 | naa20              | N(alpha)-acetyltransferase 20, NatB catalytic subunit                                 |
| A_15_P349610 | ZDB-GENE-030131-5838 | 0.68  | 0.012 | cnot3b             | CCR4-NOT transcription complex, subunit 3b                                            |
| A_15_P728481 | ZDB-GENE-050208-575  | 1.391 | 0.043 | si:dkeyp-84a8.8    | si:dkeyp-84a8.8                                                                       |
| A_15_P279181 | ZDB-GENE-010406-2    | 0.726 | 0.035 | meis3              | myeloid ecotropic viral integration site 3                                            |
| A_15_P320531 | ZDB-GENE-050410-9    | 3.926 | 0     | glb1               | galactosidase, beta 1                                                                 |
| A_15_P138296 | ZDB-GENE-050208-747  | 0.526 | 0.004 | ENSDART00000089341 | si:dkey-94n12.4                                                                       |
| A_15_P179906 | ZDB-GENE-090608-3    | 0.682 | 0.04  | pcdh17             | protocadherin 17                                                                      |
| A_15_P209626 | ZDB-GENE-060503-915  | 1.691 | 0.036 | lpcat1             | lysophosphatidylcholine acyltransferase 1                                             |
| A_15_P760956 | NA                   | 0.392 | 0.009 | NP13323536         | polyprotein-like                                                                      |
| A_15_P660146 | ZDB-GENE-000128-13   | 0.693 | 0.025 | dbx2               | developing brain homeobox 2                                                           |
| A_15_P658551 | ZDB-GENE-040318-1    | 1.758 | 0.031 | fgf2               | fibroblast growth factor 2                                                            |
| A_15_P438810 | ZDB-GENE-040426-1978 | 4     | 0     | zgc:73230          | zgc:73230                                                                             |
| A_15_P485760 | ZDB-GENE-070424-77   | 1.677 | 0.042 | zgc:162968         | taxilin beta b                                                                        |
| A_15_P181366 | ZDB-GENE-080219-34   | 1.84  | 0.005 | zgc:172250         | zgc:172250                                                                            |
| A_15_P411115 | NA                   | 1.324 | 0.048 | ENSDART00000067066 | poly (ADP-ribose) polymerase family, member 6-like                                    |
| A_15_P620016 | ZDB-GENE-980526-116  | 0.74  | 0.048 | lhx1b              | LIM homeobox 1b                                                                       |
| A_15_P654736 | ZDB-GENE-050417-171  | 0.546 | 0.002 | zgc:112012         | sema domain, transmembrane domain (TM), and cytoplasmic domain, (semaphorin) 6D, like |
| A_15_P119707 | ZDB-GENE-990415-237  | 0.68  | 0.037 | rx2                | retinal homeobox gene 2                                                               |
| A_15_P576892 | ZDB-GENE-070410-7    | 1.528 | 0.021 | zgc:158292         | zgc:158292                                                                            |
| A_15_P168031 | NA                   | 1.522 | 0.021 | LOC570100          | adrenomedullin 1-like                                                                 |
| A_15_P101581 | ZDB-GENE-040116-1    | 1.325 | 0.047 | arpc1a             | actin related protein 2/3 complex, subunit 1A                                         |
| A_15_P111524 | ZDB-GENE-010308-10   | 2.146 | 0.041 | or111-11           | odorant receptor, family D, subfamily 111, member 11                                  |
| A_15_P744573 | ZDB-GENE-060810-184  | 0.739 | 0.036 | im:7163548         | im:7163548                                                                            |
| A_15_P148856 | ZDB-GENE-081110-2    | 1.618 | 0.006 | si:dkey-34f16.5    | si:dkey-34f16.5                                                                       |
| A_15_P142591 | ZDB-GENE-040912-127  | 0.603 | 0.009 | adam9              | a disintegrin and metalloproteinase domain 9                                          |
| A_15_P159436 | ZDB-GENE-060503-87   | 1.7   | 0.004 | si:dkeyp-15g12.1   | si:dkeyp-15g12.1                                                                      |
| A_15_P172776 | ZDB-GENE-050417-304  | 0.419 | 0.001 | zgc:112432         | zgc:112432                                                                            |
| A_15_P169891 | ZDB-GENE-040426-1920 | 0.607 | 0.003 | pdcd4a             | programmed cell death 4a                                                              |

|              |                                           |       |       |                    |                                                                        |
|--------------|-------------------------------------------|-------|-------|--------------------|------------------------------------------------------------------------|
| A_15_P116849 | ZDB-GENE-991209-6                         | 0.627 | 0.015 | sema3ab            | semaphorin 3ab                                                         |
| A_15_P172006 | ZDB-GENE-070720-17                        | 0.67  | 0.009 | plk2               | polo-like kinase 2b (Drosophila)                                       |
| A_15_P120900 | ZDB-GENE-060312-21                        | 1.967 | 0.009 | cdc42l2            | cell division cycle 42 like 2                                          |
| A_15_P198141 | ZDB-GENE-030710-2                         | 0.558 | 0.007 | rtn4b              | reticulon 4b                                                           |
| A_15_P141806 | ZDB-GENE-070822-20,<br>ZDB-GENE-070822-25 | 0.411 | 0.042 | zgc:171792         | zgc:171792, zgc:173493                                                 |
| A_15_P296891 | ZDB-GENE-070912-84                        | 2.058 | 0.023 | TC380173           | si:ch211-147p17.2                                                      |
| A_15_P657406 | NA                                        | 0.61  | 0.049 | zgc:152648         | zgc:152648                                                             |
| A_15_P242046 | NA                                        | 1.385 | 0.047 | ENSDART00000115217 | hypothetical protein LOC100333305                                      |
| A_15_P472010 | ZDB-GENE-070112-1492                      | 1.497 | 0.016 | zgc:158225         | zgc:158225                                                             |
| A_15_P116614 | ZDB-GENE-030616-546                       | 0.729 | 0.029 | si:busm1-79m10.4   | si:busm1-79m10.4                                                       |
| A_15_P180131 | NA                                        | 0.624 | 0.009 | ENSDART00000019047 | similar to rtSox23                                                     |
| A_15_P442000 | NA                                        | 2.782 | 0     | TC379555           | Tumor protein p53-inducible nuclear protein 2-like                     |
| A_15_P376030 | ZDB-GENE-070112-1352                      | 0.584 | 0.013 | zgc:158644         | zgc:158644                                                             |
| A_15_P367125 | ZDB-GENE-040718-298                       | 0.653 | 0.012 | zgc:92763          | zgc:92763                                                              |
| A_15_P174801 | ZDB-GENE-050522-225                       | 1.452 | 0.038 | cyb5r4             | cytochrome b5 reductase 4                                              |
| A_15_P661076 | ZDB-GENE-030131-8204                      | 0.744 | 0.03  | zgc:110077         | zgc:110077                                                             |
| A_15_P100740 | ZDB-GENE-041105-1                         | 1.579 | 0.046 | prmt3              | protein arginine methyltransferase 3                                   |
| A_15_P163591 | ZDB-GENE-030407-3                         | 1.337 | 0.035 | zdhhc5             | zinc finger, DHHC domain containing 5                                  |
| A_15_P675836 | ZDB-GENE-040912-88                        | 0.662 | 0.047 | sepx1b             | selenoprotein X, 1b                                                    |
| A_15_P268761 | ZDB-GENE-070424-241                       | 0.563 | 0.03  | TC374937           | si:dkey-38k3.2                                                         |
| A_15_P451765 | ZDB-GENE-060503-341                       | 0.668 | 0.004 | dot1l              | DOT1-like, histone H3 methyltransferase (S. cerevisiae)                |
| A_15_P429615 | ZDB-GENE-030131-787                       | 0.648 | 0.025 | LOC558044          | spectrin, beta, non-erythrocytic 1, spectrin, beta, non-erythrocytic 2 |
| A_15_P131461 | ZDB-GENE-980526-352                       | 1.52  | 0.012 | wnt4a              | wingless-type MMTV integration site family, member 4a                  |
| A_15_P657126 | ZDB-GENE-060519-25                        | 1.842 | 0.001 | zgc:136374         | zgc:136374                                                             |
| A_15_P153851 | ZDB-GENE-040426-2054                      | 0.584 | 0.016 | sult1st4           | sulfotransferase family 1, cytosolic sulfotransferase 4                |
| A_15_P156861 | NA                                        | 3.055 | 0.001 | LOC556621          | chemokine CCL-C24j                                                     |
| A_15_P152076 | ZDB-GENE-040426-2533                      | 1.737 | 0.002 | nup43              | nucleoporin 43                                                         |
| A_15_P110932 | ZDB-GENE-040426-749                       | 1.512 | 0.012 | slc25a14           | solute carrier family 25 (mitochondrial carrier, brain), member 14     |
| A_15_P625451 | NA                                        | 0.508 | 0     | LOC100148025       | hypothetical protein LOC100148025                                      |
| A_15_P649846 | ZDB-GENE-071004-115,<br>ZDB-GENE-050321-1 | 5.471 | 0.003 | zgc:174006         | zgc:174006, heat shock cognate 70-kd protein, like                     |

|              |                                            |       |       |                    |                                                                                                |
|--------------|--------------------------------------------|-------|-------|--------------------|------------------------------------------------------------------------------------------------|
| A_15_P510042 | ZDB-GENE-060825-351                        | 1.808 | 0.005 | spi1l              | spleen focus forming virus (SFFV) proviral integration oncogene spi1 like                      |
| A_15_P320741 | ZDB-GENE-080225-1                          | 1.76  | 0.002 | ENSDART00000110205 | im:6893790                                                                                     |
| A_15_P542682 | ZDB-GENE-000322-5,<br>ZDB-GENE-070705-73   | 0.573 | 0.033 | myhz1.1            | myosin, heavy polypeptide 1.1, skeletal muscle, myosin, heavy polypeptide 1.2, skeletal muscle |
| A_15_P113260 | ZDB-GENE-030826-31                         | 0.593 | 0.019 | gys2               | glycogen synthase 2                                                                            |
| A_15_P344200 | NA                                         | 0.51  | 0.003 | LOC100150696       | similar to Zinc finger protein 264                                                             |
| A_15_P601542 | ZDB-GENE-021209-1                          | 0.501 | 0.002 | mcm5               | MCM5 minichromosome maintenance deficient 5 ( <i>S. cerevisiae</i> )                           |
| A_15_P439155 | ZDB-GENE-070615-10                         | 1.947 | 0.001 | nrg2a              | neuregulin 2a                                                                                  |
| A_15_P117887 | ZDB-GENE-030131-9816                       | 0.583 | 0.003 | zgc:63569          | zgc:63569                                                                                      |
| A_15_P739691 | ZDB-GENE-070424-95                         | 0.663 | 0.016 | zgc:162925         | zgc:162925                                                                                     |
| A_15_P246576 | ZDB-GENE-041210-176                        | 0.439 | 0.018 | TC387584           | si:dkey-202b22.6                                                                               |
| A_15_P688951 | ZDB-GENE-040426-2449                       | 0.698 | 0.016 | ift122             | intraflagellar transport 122 homolog ( <i>Chlamydomonas</i> )                                  |
| A_15_P207731 | ZDB-GENE-050522-196                        | 1.856 | 0.001 | zgc:112365         | zgc:112365                                                                                     |
| A_15_P100216 | ZDB-GENE-040625-175                        | 0.512 | 0.003 | rcn3               | reticulocalbin 3, EF-hand calcium binding domain                                               |
| A_15_P103105 | NA                                         | 2.272 | 0.006 | sb:cb252           | es1 protein-like                                                                               |
| A_15_P561642 | ZDB-GENE-060503-136,<br>ZDB-GENE-990714-21 | 0.592 | 0.028 | si:ch211-51f10.1   | si:ch211-51f10.1, tapasin                                                                      |
| A_15_P187196 | ZDB-GENE-010525-1                          | 0.333 | 0     | slc4a1             | solute carrier family 4, anion exchanger, member 1                                             |
| A_15_P102079 | ZDB-GENE-040927-27                         | 0.569 | 0.008 | phyhipl            | phytanoyl-CoA 2-hydroxylase interacting protein-like                                           |
| A_15_P721851 | ZDB-GENE-030114-1                          | 0.634 | 0.007 | elovl6             | ELOVL family member 6, elongation of long chain fatty acids (yeast)                            |
| A_15_P676036 | ZDB-GENE-041117-1                          | 0.482 | 0     | ela2               | elastase 2                                                                                     |
| A_15_P632051 | ZDB-GENE-090812-1                          | 0.625 | 0.005 | slc2a13            | solute carrier family 2 (facilitated glucose transporter), member 13                           |
| A_15_P726651 | NA                                         | 1.499 | 0.023 | EH540065           | zinc finger protein 180-like                                                                   |
| A_15_P664166 | ZDB-GENE-980526-287                        | 0.712 | 0.02  | hbbe3              | hemoglobin beta embryonic-3                                                                    |
| A_15_P726681 | ZDB-GENE-060306-3                          | 1.879 | 0.003 | fancf              | Fanconi anemia, complementation group F                                                        |
| A_15_P107802 | ZDB-GENE-080724-8                          | 0.73  | 0.035 | ctso               | cathepsin O                                                                                    |
| A_15_P443230 | ZDB-GENE-040426-1702                       | 1.446 | 0.023 | exosc4             | exosome component 4                                                                            |
| A_15_P151656 | ZDB-GENE-030131-5561                       | 0.638 | 0.014 | mycl1b             | v-myc myelocytomatosis viral oncogene homolog 1, lung carcinoma derived (avian) b              |
| A_15_P272486 | ZDB-GENE-030131-1365                       | 1.488 | 0.021 | tomm40             | translocase of outer mitochondrial membrane 40 homolog (yeast)                                 |
| A_15_P162656 | ZDB-GENE-050417-241                        | 0.691 | 0.022 | zgc:112142         | zgc:112142                                                                                     |
| A_15_P114798 | ZDB-GENE-030826-1                          | 2.089 | 0     | birc5a             | baculoviral IAP repeat-containing 5a                                                           |
| A_15_P215566 | NA                                         | 1.844 | 0.015 | TC377612           | BCL2-like 12-like                                                                              |

|              |                      |       |       |                    |                                                                                   |
|--------------|----------------------|-------|-------|--------------------|-----------------------------------------------------------------------------------|
| A_15_P622671 | ZDB-GENE-040426-839  | 1.478 | 0.016 | ciao1              | cytosolic iron-sulfur protein assembly 1 homolog (S. cerevisiae)                  |
| A_15_P144951 | NA                   | 1.343 | 0.039 | LOC553326          | hypothetical protein LOC553326                                                    |
| A_15_P197351 | ZDB-GENE-060531-65   | 1.857 | 0.009 | inaa               | internexin neuronal intermediate filament protein, alpha a                        |
| A_15_P160901 | ZDB-GENE-060929-124  | 1.526 | 0.042 | pdgfab             | platelet derived growth factor alpha b                                            |
| A_15_P629086 | ZDB-GENE-040426-859  | 1.6   | 0.005 | sepsecs            | Sep (O-phosphoserine) tRNA:Sec (selenocysteine) tRNA synthase                     |
| A_15_P365475 | ZDB-GENE-050417-291  | 0.661 | 0.048 | zgc:112072         | zgc:112072                                                                        |
| A_15_P665101 | NA                   | 0.658 | 0.012 | LOC797948          | hypothetical protein LOC797948                                                    |
| A_15_P132531 | ZDB-GENE-030131-3902 | 0.637 | 0.033 | rbm4.1             | RNA binding motif protein 4.1                                                     |
| A_15_P626406 | ZDB-GENE-990415-60   | 0.7   | 0.045 | ek3                | eph receptor B3a                                                                  |
| A_15_P624196 | ZDB-GENE-070822-19   | 0.368 | 0.03  | crygm2d12          | crystallin, gamma M2d12                                                           |
| A_15_P595917 | NA                   | 1.874 | 0.001 | EH443637           | epithelial mitogen-like                                                           |
| A_15_P239551 | NA                   | 1.379 | 0.024 | ENSDART00000102658 | nuclear transcription factor, X-box binding-like 1-like                           |
| A_15_P497367 | NA                   | 0.55  | 0.013 | LOC795531          | hypothetical LOC795531                                                            |
| A_15_P620056 | ZDB-GENE-990415-206  | 1.821 | 0.003 | pes                | pescadillo                                                                        |
| A_15_P719756 | ZDB-GENE-030131-1673 | 1.453 | 0.024 | dnajc11            | DnaJ (Hsp40) homolog, subfamily C, member 11                                      |
| A_15_P496962 | ZDB-GENE-060929-112  | 1.55  | 0.022 | zgc:152851         | zgc:152851                                                                        |
| A_15_P738236 | NA                   | 1.982 | 0.043 | LOC567640          | similar to laminin alpha 3                                                        |
| A_15_P115575 | ZDB-GENE-030131-9685 | 1.845 | 0.001 | ddx18              | DEAD (Asp-Glu-Ala-Asp) box polypeptide 18                                         |
| A_15_P623661 | ZDB-GENE-030131-8325 | 1.637 | 0.012 | cotl1              | coactosin-like 1 (Dictyostelium)                                                  |
| A_15_P206056 | ZDB-GENE-040426-798  | 0.659 | 0.038 | stk38l             | serine/threonine kinase 38 like                                                   |
| A_15_P169076 | ZDB-GENE-030131-5664 | 1.58  | 0.024 | pfkfb1             | 6-phosphofructo-2-kinase/fructose-2,6-biphosphatase 1                             |
| A_15_P140381 | ZDB-GENE-051023-15   | 1.727 | 0.007 | zgc:123172         | zgc:123172                                                                        |
| A_15_P470465 | ZDB-GENE-030131-7476 | 1.509 | 0.02  | si:ch73-13b6.3     | si:ch73-13b6.3                                                                    |
| A_15_P105229 | ZDB-GENE-041010-141  | 2.142 | 0     | zgc:103418         | Cbp/p300-interacting transactivator, with Glu/Asp-rich carboxy-terminal domain, 2 |
| A_15_P625096 | ZDB-GENE-000710-6    | 1.702 | 0.016 | mxtx2              | mix-type homeobox gene 2                                                          |
| A_15_P183421 | NA                   | 1.936 | 0.004 | LOC567047          | apolipoprotein B-editing catalytic subunit 2b                                     |
| A_15_P162271 | ZDB-GENE-070410-116  | 0.621 | 0.008 | zgc:162946         | zgc:162946                                                                        |
| A_15_P628085 | ZDB-GENE-040426-1358 | 1.604 | 0.029 | c6                 | complement component 6                                                            |
| A_15_P174226 | ZDB-GENE-070822-9    | 1.488 | 0.029 | icn2               | ictacalcin 2                                                                      |
| A_15_P545282 | NA                   | 0.479 | 0.002 | LOC561947          | hypothetical LOC561947                                                            |

|              |                      |       |       |                    |                                                                                                    |
|--------------|----------------------|-------|-------|--------------------|----------------------------------------------------------------------------------------------------|
| A_15_P287526 | ZDB-GENE-040724-23   | 0.626 | 0.012 | TC402880           | si:ch211-168n16.1                                                                                  |
| A_15_P285916 | ZDB-GENE-070912-491  | 1.428 | 0.043 | smarcd3a           | SWI/SNF related, matrix associated, actin dependent regulator of chromatin, subfamily d, member 3a |
| A_15_P519437 | NA                   | 1.534 | 0.033 | EH588992           | hypothetical LOC564635                                                                             |
| A_15_P118642 | ZDB-GENE-060929-970  | 0.728 | 0.04  | fezf1              | FEZ family zinc finger 1                                                                           |
| A_15_P377920 | ZDB-GENE-040426-1936 | 1.461 | 0.032 | fbl                | fibrillarin                                                                                        |
| A_15_P631441 | ZDB-GENE-040426-1329 | 2.089 | 0.002 | zgc:64002          | zgc:64002                                                                                          |
| A_15_P168771 | ZDB-GENE-070202-6    | 0.723 | 0.03  | hs3st3l            | heparan sulfate (glucosamine) 3-O-sulfotransferase 3-like                                          |
| A_15_P176656 | ZDB-GENE-040808-18   | 1.424 | 0.029 | arpc4l             | actin related protein 2/3 complex, subunit 4, like                                                 |
| A_15_P104402 | ZDB-GENE-040426-1216 | 0.611 | 0.008 | zgc:63658          | zgc:63658                                                                                          |
| A_15_P183121 | ZDB-GENE-040426-2084 | 2.038 | 0.044 | irf10              | interferon regulatory factor 10                                                                    |
| A_15_P109253 | ZDB-GENE-041114-23   | 0.547 | 0.001 | glt8d1             | glycosyltransferase 8 domain containing 1                                                          |
| A_15_P200456 | ZDB-GENE-090313-409  | 0.573 | 0.001 | TC409929           | si:dkeyp-9c8.1                                                                                     |
| A_15_P741731 | NA                   | 2.528 | 0.028 | LOC565904          | RNA binding motif protein 7-like                                                                   |
| A_15_P113238 | ZDB-GENE-040718-142  | 0.179 | 0.001 | decr1              | 2,4-dienoyl CoA reductase 1, mitochondrial                                                         |
| A_15_P102446 | ZDB-GENE-040718-197  | 0.57  | 0.023 | zgc:92851          | zgc:92851                                                                                          |
| A_15_P109346 | ZDB-GENE-050417-308  | 2.891 | 0     | rhoub              | ras homolog gene family, member Ub                                                                 |
| A_15_P103835 | ZDB-GENE-050309-124  | 1.626 | 0.003 | lsm11              | LSM11, U7 small nuclear RNA associated                                                             |
| A_15_P152441 | ZDB-GENE-030616-15   | 1.405 | 0.026 | scel               | sciellin                                                                                           |
| A_15_P102677 | ZDB-GENE-040426-1953 | 1.527 | 0.038 | itpk1              | inositol 1,3,4-triphosphate 5/6 kinase                                                             |
| A_15_P721476 | ZDB-GENE-991110-17   | 2.566 | 0.001 | psme1              | proteasome activator subunit 1                                                                     |
| A_15_P131847 | ZDB-GENE-040206-1    | 2.02  | 0     | fhla               | four and a half LIM domains a                                                                      |
| A_15_P198839 | ZDB-GENE-030131-9028 | 0.676 | 0.023 | myl12.2            | myosin, light chain 12, genome duplicate 2                                                         |
| A_15_P106403 | ZDB-GENE-020905-3    | 0.693 | 0.017 | msh6               | mutS homolog 6 (E. coli)                                                                           |
| A_15_P100667 | ZDB-GENE-030616-360  | 0.66  | 0.047 | ENSDART00000033943 | MAM domain containing 1                                                                            |
| A_15_P149547 | ZDB-GENE-070112-1372 | 0.677 | 0.013 | zgc:158632         | zgc:158632                                                                                         |
| A_15_P108991 | ZDB-GENE-990415-245  | 0.63  | 0.025 | elav1              | ELAV (embryonic lethal, abnormal vision, Drosophila)-like 1 (Hu antigen R)                         |
| A_15_P366595 | ZDB-GENE-041010-169  | 0.726 | 0.044 | syngn1a            | synaptogyrin 1a                                                                                    |
| A_15_P161271 | ZDB-GENE-041014-11   | 1.622 | 0.018 | si:ch211-261f7.2   | si:ch211-261f7.2                                                                                   |
| A_15_P187076 | ZDB-GENE-030131-5857 | 0.733 | 0.026 | znf652             | zinc finger protein 652                                                                            |
| A_15_P760406 | NA                   | 0.475 | 0.048 | NP13322311         | hypothetical LOC100001307                                                                          |

|              |                      |       |       |                    |                                                                                             |
|--------------|----------------------|-------|-------|--------------------|---------------------------------------------------------------------------------------------|
| A_15_P741676 | ZDB-GENE-030429-30   | 0.496 | 0.001 | gmnn               | geminin, DNA replication inhibitor                                                          |
| A_15_P373940 | NA                   | 1.683 | 0.018 | ENSDART00000113187 | hypothetical protein LOC100334824                                                           |
| A_15_P310486 | NA                   | 2.036 | 0.042 | ENSDART00000108899 | hypothetical protein LOC100334597                                                           |
| A_15_P668216 | NA                   | 1.446 | 0.043 | psmd4a             | proteasome (prosome, macropain) 26S subunit, non-ATPase, 4a, hypothetical protein LOC797088 |
| A_15_P309071 | NA                   | 1.865 | 0.018 | LOC100003205       | hypothetical LOC100003205, hypothetical protein LOC100333810                                |
| A_15_P147811 | ZDB-GENE-040625-139  | 1.595 | 0.048 | zgc:86757          | zgc:86757                                                                                   |
| A_15_P391525 | NA                   | 0.553 | 0.019 | EB935797           | hypothetical LOC100002700                                                                   |
| A_15_P257651 | NA                   | 1.412 | 0.018 | TC378046           | Fatty aldehyde dehydrogenase-like                                                           |
| A_15_P121125 | NA                   | 0.644 | 0.028 | zplxdc2            | plexin domain containing 2                                                                  |
| A_15_P140966 | ZDB-GENE-051120-105  | 0.575 | 0.014 | zgc:123242         | zgc:123242                                                                                  |
| A_15_P140491 | ZDB-GENE-070831-1    | 0.61  | 0.014 | kirrel3            | kin of IRRE like 3 like                                                                     |
| A_15_P764711 | ZDB-GENE-060825-249  | 1.469 | 0.014 | tmem103            | transmembrane protein 103                                                                   |
| A_15_P103192 | ZDB-GENE-030505-1    | 1.915 | 0.009 | foxi1              | forkhead box I1                                                                             |
| A_15_P674951 | ZDB-GENE-090313-384  | 1.63  | 0.025 | si:dkeyp-35f12.2   | si:dkeyp-35f12.2                                                                            |
| A_15_P102420 | ZDB-GENE-041114-206  | 0.573 | 0.013 | slc7a3             | solute carrier family 7 (cationic amino acid transporter, y+ system), member 3              |
| A_15_P625891 | ZDB-GENE-030131-5913 | 1.395 | 0.048 | trim24             | tripartite motif-containing 24                                                              |
| A_15_P117822 | ZDB-GENE-030131-4086 | 1.472 | 0.027 | zgc:63904          | zgc:63904                                                                                   |
| A_15_P111106 | ZDB-GENE-050327-77   | 0.483 | 0.002 | zgc:110540         | zgc:110540                                                                                  |
| A_15_P235911 | NA                   | 0.71  | 0.036 | ENSDART00000088168 | carnitine palmitoyltransferase 1B-like                                                      |
| A_15_P186451 | NA                   | 1.587 | 0.033 | ENSDART00000083267 | DnaJ homolog subfamily C member 16-like                                                     |
| A_15_P395485 | ZDB-GENE-070912-443  | 1.474 | 0.018 | TC393222           | aspartyl-tRNA synthetase 2, mitochondrial                                                   |
| A_15_P170196 | ZDB-GENE-040426-929  | 1.967 | 0.001 | pex12              | peroxisomal biogenesis factor 12                                                            |
| A_15_P206736 | ZDB-GENE-060503-628  | 0.554 | 0.033 | si:dkey-236e20.2   | si:dkey-236e20.2                                                                            |
| A_15_P118514 | ZDB-GENE-040426-1209 | 0.423 | 0.032 | zgc:63647          | zgc:63647                                                                                   |
| A_15_P120985 | ZDB-GENE-030728-1    | 2.07  | 0.001 | rgs9bp             | regulator of G-protein signalling 9 binding protein                                         |
| A_15_P104170 | ZDB-GENE-010509-1    | 1.896 | 0.012 | bcdo2l             | beta-carotene 15, 15-dioxygenase 2, like                                                    |
| A_15_P141116 | ZDB-GENE-060929-488  | 1.804 | 0.006 | ctdsplb            | CTD (carboxy-terminal domain, RNA polymerase II, polypeptide A) small phosphatase-like b    |
| A_15_P210651 | ZDB-GENE-040426-2697 | 1.733 | 0.002 | znf330             | zinc finger protein 330                                                                     |
| A_15_P722736 | ZDB-GENE-060519-2    | 0.652 | 0.042 | hao1               | hydroxyacid oxidase (glycolate oxidase) 1                                                   |
| A_15_P620086 | ZDB-GENE-030131-5705 | 1.57  | 0.009 | zgc:66472          | zgc:66472                                                                                   |

|              |                      |       |       |                    |                                                                                        |
|--------------|----------------------|-------|-------|--------------------|----------------------------------------------------------------------------------------|
| A_15_P549712 | NA                   | 1.884 | 0.02  | LOC100150702       | hypothetical LOC100150702                                                              |
| A_15_P281316 | ZDB-GENE-060825-337  | 1.816 | 0.003 | zgc:153154         | zgc:153154                                                                             |
| A_15_P164416 | ZDB-GENE-980526-487  | 0.355 | 0.002 | cfb                | complement factor B                                                                    |
| A_15_P696626 | ZDB-GENE-041010-51   | 1.965 | 0.002 | c1qc               | complement component 1, q subcomponent, C chain                                        |
| A_15_P658073 | ZDB-GENE-040426-2317 | 2.085 | 0     | gnl2               | guanine nucleotide binding protein-like 2 (nucleolar)                                  |
| A_15_P118817 | NA                   | 1.57  | 0.009 | TC390852           | hypothetical protein LOC100333066                                                      |
| A_15_P140096 | ZDB-GENE-031105-1    | 0.398 | 0.001 | dpysl2             | dihydropyrimidinase-like 2                                                             |
| A_15_P740212 | ZDB-GENE-030131-5773 | 0.453 | 0.001 | hpx                | hemopexin                                                                              |
| A_15_P109240 | ZDB-GENE-030131-373  | 1.715 | 0.018 | cst3               | cystatin C (amyloid angiopathy and cerebral hemorrhage)                                |
| A_15_P182541 | NA                   | 0.627 | 0.035 | LOC100003365       | phosphoprotein associated with glycosphingolipid-enriched microdomains 1-like          |
| A_15_P150596 | ZDB-GENE-060531-166  | 1.427 | 0.032 | si:rp71-10d23.3    | si:rp71-10d23.3                                                                        |
| A_15_P557227 | NA                   | 0.632 | 0.032 | ENSDART00000102357 | hypothetical protein LOC553451                                                         |
| A_15_P240406 | NA                   | 2.555 | 0.024 | LOC556476          | early B-cell factor 3-like                                                             |
| A_15_P195766 | ZDB-GENE-040426-2789 | 1.707 | 0.006 | srrm1              | serine/arginine repetitive matrix 1                                                    |
| A_15_P108724 | ZDB-GENE-010226-2    | 1.735 | 0.006 | gfra1a             | gdnf family receptor alpha 1a                                                          |
| A_15_P162001 | ZDB-GENE-040718-331  | 1.528 | 0.029 | rnd3b              | Rho family GTPase 3b                                                                   |
| A_15_P763551 | NA                   | 2.312 | 0.004 | NP13317111         | hypothetical protein LOC100332776                                                      |
| A_15_P370340 | NA                   | 0.636 | 0.008 | LOC569113          | novel protein similar to potassium channel tetramerisation domain containing 3 (KCTD3) |
| A_15_P498912 | NA                   | 1.829 | 0.002 | ENSDART00000112142 | hypothetical LOC563528                                                                 |
| A_15_P115417 | ZDB-GENE-040310-5    | 0.43  | 0.001 | sfrp1a             | secreted frizzled-related protein 1a                                                   |
| A_15_P639218 | ZDB-GENE-050809-135  | 0.727 | 0.038 | vti1a              | vesicle transport through interaction with t-SNAREs homolog 1A (yeast)                 |
| A_15_P334704 | ZDB-GENE-030131-7531 | 1.554 | 0.013 | dsg2               | desmoglein 2                                                                           |
| A_15_P109767 | ZDB-GENE-990415-205  | 0.699 | 0.04  | vsx1               | visual system homeobox 1 homolog, chx10-like                                           |
| A_15_P654691 | ZDB-GENE-050610-11   | 0.767 | 0.045 | pcdh2g20           | protocadherin 2 gamma 20                                                               |
| A_15_P366130 | ZDB-GENE-041114-40   | 3.859 | 0.001 | rnf24              | ring finger protein 24                                                                 |
| A_15_P143941 | ZDB-GENE-081104-325  | 2.559 | 0.003 | si:dkey-165a24.3   | si:dkey-165a24.3                                                                       |
| A_15_P114381 | ZDB-GENE-041014-1    | 0.502 | 0.009 | met                | met proto-oncogene (hepatocyte growth factor receptor)                                 |
| A_15_P761326 | NA                   | 3.748 | 0     | NP13324704         | Gap-Pol polyprotein-like                                                               |
| A_15_P115999 | ZDB-GENE-991124-5    | 0.588 | 0.01  | tbx4               | T-box 4                                                                                |
| A_15_P169581 | ZDB-GENE-061215-96   | 1.65  | 0.014 | zgc:158337         | zgc:158337                                                                             |

|              |                      |       |       |                    |                                                               |
|--------------|----------------------|-------|-------|--------------------|---------------------------------------------------------------|
| A_15_P726631 | ZDB-GENE-030131-576  | 1.903 | 0.023 | clk4a              | CDC-like kinase 4a                                            |
| A_15_P308006 | ZDB-GENE-060503-363  | 0.743 | 0.038 | si:dkey-78d16.2    | si:dkey-78d16.2                                               |
| A_15_P309766 | NA                   | 2.119 | 0     | ENSDART00000109799 | elastin microfibril interfacier 1-like                        |
| A_15_P278866 | ZDB-GENE-070928-39   | 1.587 | 0.044 | zgc:173548         | zgc:173548                                                    |
| A_15_P135256 | NA                   | 9.288 | 0     | NP13317723         | leukotriene B4 receptor 1-like                                |
| A_15_P132276 | ZDB-GENE-031218-1    | 0.775 | 0.05  | pbx3a              | pre-B-cell leukemia transcription factor 3a                   |
| A_15_P488910 | ZDB-GENE-070928-33   | 1.753 | 0.013 | zgc:171802         | zgc:171802                                                    |
| A_15_P142146 | ZDB-GENE-030131-3527 | 0.621 | 0.006 | e2f7               | E2F transcription factor 7                                    |
| A_15_P101365 | ZDB-GENE-040426-1827 | 0.513 | 0.003 | zgc:77375          | zgc:77375                                                     |
| A_15_P183376 | NA                   | 1.623 | 0.018 | ENSDART00000104753 | F-box protein 6-like                                          |
| A_15_P217166 | ZDB-GENE-060929-868  | 0.705 | 0.044 | zfp438             | zinc finger protein 438                                       |
| A_15_P259916 | NA                   | 0.602 | 0.044 | EH579308           | hypothetical protein LOC100331497                             |
| A_15_P168831 | ZDB-GENE-980526-171  | 0.364 | 0     | tbx6               | T-box gene 6                                                  |
| A_15_P136326 | ZDB-GENE-050518-2    | 0.53  | 0.001 | lrp5               | low density lipoprotein receptor-related protein 5            |
| A_15_P620101 | ZDB-GENE-030131-1731 | 0.599 | 0.032 | lgi1a              | leucine-rich, glioma inactivated 1a                           |
| A_15_P396060 | ZDB-GENE-041014-251  | 1.401 | 0.029 | slain2             | SLAIN motif family, member 2                                  |
| A_15_P135131 | ZDB-GENE-090908-4    | 0.726 | 0.039 | ENSDART00000008808 | homeobox containing 1 b                                       |
| A_15_P121099 | ZDB-GENE-050417-3    | 1.334 | 0.049 | 41162              | septin 10                                                     |
| A_15_P121278 | ZDB-GENE-050522-412  | 1.481 | 0.03  | spra               | sepiapterin reductase a                                       |
| A_15_P112066 | ZDB-GENE-030131-5297 | 0.712 | 0.043 | rpl12              | ribosomal protein L12                                         |
| A_15_P208891 | ZDB-GENE-040914-7    | 1.613 | 0.029 | prmt6              | protein arginine methyltransferase 6                          |
| A_15_P175361 | ZDB-GENE-050913-41   | 1.357 | 0.049 | zgc:114142         | zgc:114142                                                    |
| A_15_P681331 | NA                   | 0.299 | 0.001 | TC396309           | zinc finger protein 53-like                                   |
| A_15_P111667 | ZDB-GENE-040426-2210 | 0.654 | 0.033 | zgc:85777          | zgc:85777                                                     |
| A_15_P770119 | NA                   | 1.477 | 0.013 | LOC797799          | similar to serine protease, hypothetical protein LOC100149563 |
| A_15_P107977 | ZDB-GENE-030616-621  | 0.649 | 0.013 | znf511             | zinc finger protein 511                                       |
| A_15_P131761 | ZDB-GENE-990708-6    | 2.478 | 0     | foxo3b             | forkhead box O3b                                              |
| A_15_P160591 | ZDB-GENE-990715-10   | 0.525 | 0.011 | skib               | nuclear oncoprotein skib                                      |
| A_15_P113434 | NA                   | 0.638 | 0.047 | TC401373           | neuronal pentraxin with chromo domain-like                    |
| A_15_P168276 | ZDB-GENE-070410-65   | 1.488 | 0.032 | zgc:162301         | zgc:162301                                                    |



|              |                                                                    |        |       |                    |                                                                                          |
|--------------|--------------------------------------------------------------------|--------|-------|--------------------|------------------------------------------------------------------------------------------|
| A_15_P719911 | ZDB-GENE-040912-164                                                | 1.668  | 0.002 | zgc:92126          | zgc:92126                                                                                |
| A_15_P572238 | ZDB-GENE-061110-43                                                 | 1.483  | 0.043 | zgc:153038         | zgc:153038                                                                               |
| A_15_P176666 | ZDB-GENE-050522-48                                                 | 1.693  | 0.044 | gmpr               | guanosine monophosphate reductase                                                        |
| A_15_P147091 | ZDB-GENE-060531-91                                                 | 1.576  | 0.006 | npr3               | natriuretic peptide receptor C/guanylate cyclase C (atrionatriuretic peptide receptor C) |
| A_15_P118315 | ZDB-GENE-040824-6                                                  | 0.554  | 0.026 | helt               | hey-like transcription factor                                                            |
| A_15_P148136 | ZDB-GENE-081210-3                                                  | 0.597  | 0.006 | igfbp1b            | insulin-like growth factor binding protein 1b                                            |
| A_15_P175356 | ZDB-GENE-010328-17                                                 | 0.606  | 0.026 | bcl7b              | B-cell CLL/lymphoma 7B, b                                                                |
| A_15_P113631 | ZDB-GENE-990415-61                                                 | 0.675  | 0.024 | rtk4               | eph receptor A4, like                                                                    |
| A_15_P119317 | NA                                                                 | 0.645  | 0.029 | zgc:76887          | zgc:76887, protein phosphatase 2, regulatory subunit B, delta-like                       |
| A_15_P757121 | ZDB-GENE-060825-93                                                 | 2.217  | 0.001 | npr12              | nitrogen permease regulator-like 2 (S. cerevisiae)                                       |
| A_15_P276286 | ZDB-GENE-060503-525                                                | 1.376  | 0.037 | si:dkey-19011.1    | si:dkey-19011.1                                                                          |
| A_15_P529677 | ZDB-GENE-070912-282                                                | 11.531 | 0     | dnah7              | dynein, axonemal, heavy chain 7                                                          |
| A_15_P192686 | ZDB-GENE-040625-177                                                | 1.754  | 0.003 | rpf1               | ribosome production factor 1 homolog (S. cerevisiae)                                     |
| A_15_P723336 | ZDB-GENE-050419-45                                                 | 1.538  | 0.015 | gmgs               | GDP-mannose 4,6-dehydratase                                                              |
| A_15_P117637 | ZDB-GENE-040912-135                                                | 0.412  | 0.009 | pfkma              | phosphofructokinase, muscle a                                                            |
| A_15_P491062 | NA                                                                 | 1.547  | 0.033 | ENSDART00000060730 | major histocompatibility complex, class II, DO alpha-like                                |
| A_15_P196776 | NA                                                                 | 0.396  | 0.003 | NP13324395         | mCG141180-like                                                                           |
| A_15_P625511 | ZDB-GENE-031116-3,<br>ZDB-GENE-060421-3062,<br>ZDB-GENE-071004-119 | 0.377  | 0.001 | zgc:158494         | zgc:158494, zgc:136254, zgc:174237                                                       |
| A_15_P164011 | ZDB-GENE-041010-137                                                | 1.468  | 0.019 | cd151              | CD151 molecule                                                                           |
| A_15_P558917 | NA                                                                 | 2.028  | 0.004 | TC390327           | zinc finger protein 300-like                                                             |
| A_15_P721431 | ZDB-GENE-030131-1175                                               | 0.655  | 0.015 | cd9a               | CD9 antigen (p24) a                                                                      |
| A_15_P118454 | ZDB-GENE-060825-216                                                | 0.702  | 0.026 | zgc:153243         | zgc:153243                                                                               |
| A_15_P621646 | ZDB-GENE-040625-154                                                | 0.269  | 0.03  | zgc:86723          | zgc:86723                                                                                |
| A_15_P738911 | ZDB-GENE-040204-1                                                  | 0.613  | 0.003 | mdh1a              | malate dehydrogenase 1a, NAD (soluble)                                                   |
| A_15_P168696 | ZDB-GENE-041114-96                                                 | 0.544  | 0.003 | def8               | differentially expressed in FDCP 8 homolog (mouse)                                       |
| A_15_P457610 | ZDB-GENE-001228-1                                                  | 0.572  | 0.003 | eomesa             | eomesodermin homolog a                                                                   |
| A_15_P108392 | ZDB-GENE-030131-6034                                               | 1.516  | 0.005 | cdv3               | carnitine deficiency-associated gene expressed in ventricle 3                            |
| A_15_P337517 | ZDB-GENE-070912-283                                                | 1.937  | 0.004 | TC390949           | si:ch211-284o19.1                                                                        |
| A_15_P104961 | ZDB-GENE-040718-261                                                | 0.591  | 0.006 | asb13              | ankyrin repeat and SOCS box-containing 13                                                |

|              |                      |       |       |                    |                                                                                       |
|--------------|----------------------|-------|-------|--------------------|---------------------------------------------------------------------------------------|
| A_15_P165731 | ZDB-GENE-061013-179  | 0.575 | 0.016 | zgc:153898         | zgc:153898                                                                            |
| A_15_P206361 | ZDB-GENE-040426-1062 | 1.844 | 0.008 | imp3               | IMP3, U3 small nucleolar ribonucleoprotein, homolog (yeast)                           |
| A_15_P108955 | ZDB-GENE-070912-716  | 0.547 | 0.013 | tmem198a           | transmembrane protein 198a                                                            |
| A_15_P637886 | ZDB-GENE-040718-450  | 1.449 | 0.011 | denr               | density-regulated protein                                                             |
| A_15_P399843 | NA                   | 1.949 | 0.01  | LOC798290          | hypothetical protein LOC798290                                                        |
| A_15_P169016 | ZDB-GENE-030131-6283 | 0.711 | 0.02  | cuedc2             | CUE domain containing 2                                                               |
| A_15_P198366 | NA                   | 0.728 | 0.022 | mtf2               | metal response element binding transcription factor 2, hypothetical protein LOC553361 |
| A_15_P119740 | ZDB-GENE-040426-2609 | 0.443 | 0     | trib3              | tribbles homolog 3 (Drosophila)                                                       |
| A_15_P444790 | NA                   | 0.596 | 0.036 | ENSDART00000092579 | hypothetical protein LOC100330769                                                     |
| A_15_P110392 | ZDB-GENE-990415-28   | 1.486 | 0.006 | ck2a2a             | casein kinase 2 alpha 2a                                                              |
| A_15_P722116 | ZDB-GENE-041210-73   | 1.533 | 0.031 | hspa14             | heat shock protein 14                                                                 |
| A_15_P726141 | ZDB-GENE-060929-120  | 1.967 | 0.001 | zgc:152651         | zgc:152651                                                                            |
| A_15_P620396 | ZDB-GENE-040426-2208 | 2.741 | 0.038 | tmem37             | transmembrane protein 37                                                              |
| A_15_P188471 | ZDB-GENE-040712-1    | 1.404 | 0.049 | ltv1               | LTV1 homolog (S. cerevisiae)                                                          |
| A_15_P319101 | ZDB-GENE-040812-3    | 2.388 | 0     | cdkn1bl            | cyclin-dependent kinase inhibitor 1b, like                                            |
| A_15_P742511 | ZDB-GENE-050417-57   | 4.6   | 0.026 | zgc:110304         | zgc:110304                                                                            |
| A_15_P729421 | ZDB-GENE-070112-172  | 0.556 | 0.003 | zgc:158795         | zgc:158795                                                                            |
| A_15_P502982 | ZDB-GENE-080211-1    | 0.665 | 0.041 | TC388770           | neuro-oncological ventral antigen 2                                                   |
| A_15_P118708 | ZDB-GENE-050208-411  | 0.431 | 0.004 | rdh5               | retinol dehydrogenase 5 (11-cis/9-cis)                                                |
| A_15_P379230 | NA                   | 0.593 | 0.01  | LOC565638          | connexin 43-like                                                                      |
| A_15_P399575 | NA                   | 1.374 | 0.041 | LOC100004906       | hypothetical LOC100004906                                                             |
| A_15_P365765 | ZDB-GENE-041007-5    | 0.686 | 0.009 | efna1b             | ephrin A1b                                                                            |
| A_15_P284371 | ZDB-GENE-050306-2    | 1.828 | 0.002 | upp1               | uridine phosphorylase 1                                                               |
| A_15_P367200 | ZDB-GENE-051030-36   | 0.719 | 0.045 | zgc:123177         | zgc:123177                                                                            |
| A_15_P103808 | ZDB-GENE-040912-69   | 2.297 | 0     | zgc:101565         | zgc:101565                                                                            |
| A_15_P626706 | ZDB-GENE-070424-39   | 1.701 | 0.039 | zgc:162756         | zgc:162756                                                                            |
| A_15_P748068 | ZDB-GENE-030131-6664 | 1.521 | 0.021 | anxa1a             | annexin A1a                                                                           |
| A_15_P158716 | ZDB-GENE-030131-1770 | 0.691 | 0.011 | si:ch211-203h15.3  | si:ch211-203h15.3                                                                     |
| A_15_P434805 | ZDB-GENE-030131-2954 | 0.726 | 0.035 | ENSDART00000059752 | lipid phosphate phosphatase-related protein type 3b                                   |
| A_15_P284016 | ZDB-GENE-080917-16   | 0.57  | 0.017 | ENSDART00000087589 | si:ch211-152h14.2                                                                     |

|              |                      |       |       |                    |                                                                                    |
|--------------|----------------------|-------|-------|--------------------|------------------------------------------------------------------------------------|
| A_15_P488460 | ZDB-GENE-090421-3    | 0.275 | 0.003 | mboat4             | membrane bound O-acyltransferase domain containing 4                               |
| A_15_P447645 | NA                   | 4.858 | 0.001 | LOC100151162       | transmembrane protein 90B-like                                                     |
| A_15_P164976 | NA                   | 3.208 | 0     | LOC795748          | hypothetical LOC795748                                                             |
| A_15_P548752 | ZDB-GENE-080403-1    | 0.393 | 0.001 | ENSDART00000065660 | nuclear receptor subfamily 0, group B, member 2a                                   |
| A_15_P259186 | NA                   | 1.351 | 0.041 | LOC563797          | CD209 antigen-like protein E-like                                                  |
| A_15_P772191 | NA                   | 0.226 | 0.048 | TC387330           | hypothetical LOC795173                                                             |
| A_15_P441928 | ZDB-GENE-070705-207  | 0.655 | 0.038 | si:ch73-138e16.8   | si:ch73-138e16.8                                                                   |
| A_15_P113234 | ZDB-GENE-041006-1    | 2.363 | 0.008 | gtf3aa             | general transcription factor IIIAa                                                 |
| A_15_P205706 | ZDB-GENE-040812-2    | 1.897 | 0.021 | caprin2            | caprin family member 2                                                             |
| A_15_P674121 | ZDB-GENE-040718-58   | 1.455 | 0.017 | tjp2b              | tight junction protein 2b (zona occludens 2)                                       |
| A_15_P219481 | ZDB-GENE-980526-16   | 0.557 | 0.006 | ednrb1             | endothelin receptor B                                                              |
| A_15_P176481 | ZDB-GENE-070410-86   | 1.926 | 0.002 | zgc:162608         | zgc:162608                                                                         |
| A_15_P195696 | ZDB-GENE-061026-3    | 1.836 | 0.023 | nyx                | nyctalopin                                                                         |
| A_15_P188766 | NA                   | 0.627 | 0.041 | ENSDART00000081445 | hypothetical protein LOC402829                                                     |
| A_15_P297286 | ZDB-GENE-040426-1588 | 0.323 | 0.005 | mxd3               | MAX dimerization protein 3                                                         |
| A_15_P117513 | ZDB-GENE-040108-1    | 0.685 | 0.04  | chrnb3a            | cholinergic receptor, nicotinic, beta polypeptide 3a                               |
| A_15_P632266 | ZDB-GENE-040624-6    | 0.701 | 0.024 | gpr98              | G protein-coupled receptor 98                                                      |
| A_15_P395895 | NA                   | 0.567 | 0.003 | LOC564068          | endoplasmic reticulum aminopeptidase 1-like                                        |
| A_15_P305041 | ZDB-GENE-080220-21   | 0.744 | 0.044 | zgc:175209         | zgc:175209                                                                         |
| A_15_P112160 | ZDB-GENE-030131-9599 | 0.405 | 0.003 | si:dkey-98p3.7     | si:dkey-98p3.7                                                                     |
| A_15_P724151 | ZDB-GENE-030131-4189 | 1.361 | 0.043 | kdelr2l            | KDEL (Lys-Asp-Glu-Leu) endoplasmic reticulum protein retention receptor 2, like    |
| A_15_P108922 | ZDB-GENE-040426-2703 | 0.686 | 0.043 | got2a              | glutamic-oxaloacetic transaminase 2a, mitochondrial (aspartate aminotransferase 2) |
| A_15_P396930 | NA                   | 0.593 | 0.01  | LOC562747          | transcriptional repressor NAC1-like                                                |
| A_15_P112233 | ZDB-GENE-041010-44   | 1.486 | 0.015 | ank1               | ankyrin 1, erythrocytic                                                            |
| A_15_P725381 | ZDB-GENE-040426-990  | 0.584 | 0.015 | wdr45              | WD repeat domain 45                                                                |
| A_15_P108176 | ZDB-GENE-010102-1    | 0.655 | 0.02  | dcn                | decorin                                                                            |
| A_15_P102434 | NA                   | 0.567 | 0.024 | zgc:172294         | zgc:172294, F-box and WD repeat domain containing 8-like                           |
| A_15_P628176 | ZDB-GENE-050417-70   | 3.304 | 0.002 | acer1              | alkaline ceramidase 1                                                              |
| A_15_P106214 | ZDB-GENE-030131-9097 | 0.695 | 0.025 | zgc:77151          | zgc:77151                                                                          |
| A_15_P606427 | ZDB-GENE-090312-199  | 0.592 | 0.03  | TC421894           | N-deacetylase/N-sulfotransferase (heparan glucosaminy) 3                           |

|              |                                                                |       |       |                    |                                                                                                                                                   |
|--------------|----------------------------------------------------------------|-------|-------|--------------------|---------------------------------------------------------------------------------------------------------------------------------------------------|
| A_15_P105385 | ZDB-GENE-050327-19                                             | 1.679 | 0.008 | ccdc76             | coiled-coil domain containing 76                                                                                                                  |
| A_15_P119524 | ZDB-GENE-030804-11                                             | 0.689 | 0.036 | lbr                | lamin B receptor                                                                                                                                  |
| A_15_P706091 | ZDB-GENE-000322-5,<br>ZDB-GENE-070705-73,<br>ZDB-GENE-020604-1 | 0.587 | 0.018 | myh21.1            | myosin, heavy polypeptide 1.1, skeletal muscle, myosin, heavy polypeptide 1.2, skeletal muscle, myosin, he                                        |
| A_15_P202986 | NA                                                             | 1.405 | 0.043 | ENSDART00000058027 | hypothetical protein LOC407656                                                                                                                    |
| A_15_P293971 | ZDB-GENE-030131-145                                            | 1.738 | 0.004 | tim44              | translocase of inner mitochondrial membrane 44 homolog (yeast)                                                                                    |
| A_15_P367450 | ZDB-GENE-050417-340                                            | 1.368 | 0.047 | zgc:110325         | zgc:110325                                                                                                                                        |
| A_15_P659257 | ZDB-GENE-040426-1560                                           | 1.459 | 0.033 | prmt7              | protein arginine N-methyltransferase 7                                                                                                            |
| A_15_P578227 | ZDB-GENE-041212-76                                             | 2.154 | 0.001 | foxj1b             | forkhead box J1b                                                                                                                                  |
| A_15_P734526 | ZDB-GENE-030131-223                                            | 1.921 | 0.004 | ssb                | Sjogren syndrome antigen B (autoantigen La)                                                                                                       |
| A_15_P563537 | ZDB-GENE-030131-6266                                           | 0.41  | 0     | ivns1abpb          | influenza virus NS1A binding protein b                                                                                                            |
| A_15_P257809 | ZDB-GENE-040724-103                                            | 2.337 | 0.001 | rd3                | retinal degeneration 3                                                                                                                            |
| A_15_P113168 | NA                                                             | 1.704 | 0.024 | LOC560826          | novel protein similar to human chondroitin sulfate GalNAcT-2 (GALNACT-2)                                                                          |
| A_15_P114717 | ZDB-GENE-040912-44                                             | 0.574 | 0.018 | zgc:103408         | integrin beta 1 binding protein 3                                                                                                                 |
| A_15_P116715 | ZDB-GENE-030131-7310                                           | 0.724 | 0.023 | eef1b2             | eukaryotic translation elongation factor 1 beta 2                                                                                                 |
| A_15_P159621 | ZDB-GENE-041210-210                                            | 0.717 | 0.032 | cerk               | ceramide kinase                                                                                                                                   |
| A_15_P719376 | ZDB-GENE-051120-69                                             | 3.015 | 0     | zgc:123268         | zgc:123268                                                                                                                                        |
| A_15_P622141 | ZDB-GENE-071004-18                                             | 1.881 | 0.001 | zgc:171671         | zgc:171671                                                                                                                                        |
| A_15_P738511 | ZDB-GENE-080219-23,<br>ZDB-GENE-080215-9                       | 0.736 | 0.038 | zgc:172051         | zgc:172051, zgc:172253                                                                                                                            |
| A_15_P112853 | ZDB-GENE-030616-177                                            | 1.909 | 0.027 | rnd2               | Rho family GTPase 2                                                                                                                               |
| A_15_P445210 | NA                                                             | 0.66  | 0.011 | ENSDART00000098307 | hypothetical LOC568719                                                                                                                            |
| A_15_P148361 | ZDB-GENE-030131-4524                                           | 1.396 | 0.033 | sh3gl1a            | SH3-domain GRB2-like 1a                                                                                                                           |
| A_15_P400075 | ZDB-GENE-030102-2                                              | 1.345 | 0.027 | ENSDART00000102837 | zinc finger, CCHC domain containing 7- like                                                                                                       |
| A_15_P665056 | NA                                                             | 0.517 | 0     | myh2               | myosin, heavy polypeptide 2, fast muscle specific, myosin, heavy polypeptide 2, fast muscle-like                                                  |
| A_15_P130641 | ZDB-GENE-080226-5                                              | 0.526 | 0.048 | sc:d0823           | sc:d0823                                                                                                                                          |
| A_15_P677256 | ZDB-GENE-040718-389                                            | 1.703 | 0.002 | zgc:92198          | zgc:92198                                                                                                                                         |
| A_15_P142276 | ZDB-GENE-070917-3                                              | 0.471 | 0.004 | tas1r3             | taste receptor, type 1, member 3                                                                                                                  |
| A_15_P393280 | ZDB-GENE-071024-1                                              | 1.436 | 0.033 | nfkbiz             | nuclear factor of kappa light polypeptide gene enhancer in B-cells inhibitor, zeta                                                                |
| A_15_P722036 | ZDB-GENE-070705-73,<br>ZDB-GENE-000322-5,<br>ZDB-GENE-020604-1 | 0.555 | 0.002 | myh21.2            | myosin, heavy polypeptide 1.2, skeletal muscle, myosin, heavy polypeptide 1.1, skeletal muscle, myosin, heavy polypeptide 2, fast muscle specific |
| A_15_P635961 | ZDB-GENE-080930-1                                              | 1.648 | 0.008 | smyhc3             | slow myosin heavy chain 3                                                                                                                         |

|              |                                             |       |       |                    |                                                                                                |
|--------------|---------------------------------------------|-------|-------|--------------------|------------------------------------------------------------------------------------------------|
| A_15_P130741 | ZDB-GENE-070130-1                           | 0.592 | 0.014 | nr0b1              | nuclear receptor subfamily 0, group B, member 1                                                |
| A_15_P394310 | NA                                          | 1.394 | 0.02  | ENSDART00000089234 | novel protein similar to vertebrate solute carrier family 12, (potassium-chloride transporter) |
| A_15_P132996 | ZDB-GENE-040724-165                         | 0.725 | 0.025 | ENSDART00000046546 | intraflagellar transport 140 homolog (Chlamydomonas)                                           |
| A_15_P402200 | ZDB-GENE-030131-545                         | 1.591 | 0.004 | wu:fb36d12         | wu:fb36d12                                                                                     |
| A_15_P746561 | ZDB-GENE-000607-13                          | 0.626 | 0.019 | sox5               | SRY-box containing gene 5                                                                      |
| A_15_P596302 | ZDB-GENE-030131-6705                        | 0.608 | 0.016 | TC407699           | si:dkey-102m7.4                                                                                |
| A_15_P110871 | ZDB-GENE-030131-6757                        | 0.573 | 0.019 | pmp22a             | peripheral myelin protein 22a                                                                  |
| A_15_P111091 | ZDB-GENE-060421-6479                        | 1.581 | 0.021 | gale               | UDP-galactose-4-epimerase                                                                      |
| A_15_P205916 | ZDB-GENE-041203-2                           | 0.541 | 0.023 | foxp2              | forkhead box P2                                                                                |
| A_15_P711301 | NA                                          | 0.684 | 0.022 | LOC100150204       | Uncharacterized protein C5orf25-like                                                           |
| A_15_P598722 | ZDB-GENE-030131-6125                        | 0.426 | 0     | zgc:174906         | zgc:174906                                                                                     |
| A_15_P196111 | ZDB-GENE-050417-335                         | 1.596 | 0.01  | zgc:111983         | zgc:111983                                                                                     |
| A_15_P545012 | ZDB-GENE-070410-29                          | 1.537 | 0.023 | zgc:162175         | zgc:162175                                                                                     |
| A_15_P177461 | NA                                          | 1.877 | 0.009 | LOC563713          | hypothetical LOC563713                                                                         |
| A_15_P105123 | ZDB-GENE-040426-1906                        | 1.686 | 0.047 | ampd1              | adenosine monophosphate deaminase 1 (isoform M)                                                |
| A_15_P550722 | ZDB-GENE-070705-257                         | 0.369 | 0.004 | si:ch211-80h18.1   | si:ch211-80h18.1                                                                               |
| A_15_P240206 | NA                                          | 0.334 | 0.001 | LOC567750          | hypothetical LOC567750                                                                         |
| A_15_P224781 | ZDB-GENE-080403-11                          | 0.543 | 0.014 | kat2a              | K(lysine) acetyltransferase 2A                                                                 |
| A_15_P201016 | NA                                          | 0.655 | 0.043 | LOC553421          | hypothetical protein LOC553421                                                                 |
| A_15_P449570 | ZDB-GENE-030131-3664                        | 1.875 | 0.019 | wu:fc48h10         | wu:fc48h10                                                                                     |
| A_15_P193096 | ZDB-GENE-040709-1                           | 0.49  | 0.002 | otomp              | otolith matrix protein                                                                         |
| A_15_P517822 | ZDB-GENE-070912-449                         | 0.529 | 0.013 | si:dkey-223d7.5    | si:dkey-223d7.5                                                                                |
| A_15_P410225 | ZDB-GENE-090313-326                         | 1.598 | 0.019 | si:dkey-71p21.12   | si:dkey-71p21.12                                                                               |
| A_15_P308316 | NA                                          | 0.409 | 0.004 | ENSDART00000109825 | lamin-B receptor-like                                                                          |
| A_15_P262466 | ZDB-GENE-030131-5919                        | 1.884 | 0.024 | fxyd6              | FXYP domain containing ion transport regulator 6                                               |
| A_15_P142001 | ZDB-GENE-030131-3767                        | 0.634 | 0.035 | tnika              | TRAF2 and NCK interacting kinase a                                                             |
| A_15_P309076 | ZDB-GENE-081105-100                         | 1.884 | 0.03  | TC368343           | si:rp71-68n21.9                                                                                |
| A_15_P265406 | ZDB-GENE-081028-51                          | 0.629 | 0.012 | ENSDART00000006698 | si:ch73-38f1.1                                                                                 |
| A_15_P622211 | ZDB-GENE-071004-101,<br>ZDB-GENE-071004-119 | 0.306 | 0.001 | zgc:173443         | zgc:173443, zgc:174237                                                                         |
| A_15_P214196 | ZDB-GENE-050823-3                           | 0.584 | 0.006 | gpr146             | G protein-coupled receptor 146                                                                 |

|              |                      |       |       |                    |                                                                                                        |
|--------------|----------------------|-------|-------|--------------------|--------------------------------------------------------------------------------------------------------|
| A_15_P272266 | ZDB-GENE-980526-474  | 1.666 | 0.015 | bmp2b              | bone morphogenetic protein 2b                                                                          |
| A_15_P667986 | ZDB-GENE-040718-125  | 1.394 | 0.045 | zgc:92655          | zgc:92655                                                                                              |
| A_15_P199086 | ZDB-GENE-070912-288  | 0.246 | 0     | si:ch211-284o19.6  | si:ch211-284o19.6                                                                                      |
| A_15_P190546 | ZDB-GENE-030131-5286 | 1.635 | 0.028 | polr1a             | polymerase (RNA) I polypeptide A                                                                       |
| A_15_P658581 | ZDB-GENE-020402-3    | 0.686 | 0.045 | dacha              | dachshund a                                                                                            |
| A_15_P758961 | NA                   | 2.333 | 0.002 | TC406523           | hCG2038584-like                                                                                        |
| A_15_P170351 | ZDB-GENE-040801-20   | 0.648 | 0.016 | zgc:100906         | zgc:100906                                                                                             |
| A_15_P107762 | ZDB-GENE-041114-3    | 0.524 | 0.007 | ankrd9             | ankyrin repeat domain 9                                                                                |
| A_15_P240376 | NA                   | 0.657 | 0.025 | LOC100000353       | casein kinase 1, delta-like                                                                            |
| A_15_P101860 | ZDB-GENE-040718-388  | 0.604 | 0.027 | acss2              | acyl-CoA synthetase short-chain family member 2                                                        |
| A_15_P102757 | ZDB-GENE-030619-14   | 0.391 | 0.004 | plk4               | polo-like kinase 4 (Drosophila)                                                                        |
| A_15_P597942 | ZDB-GENE-030131-5935 | 1.798 | 0.002 | wu:fb34c08         | phoenix                                                                                                |
| A_15_P296716 | ZDB-GENE-041010-125  | 0.341 | 0     | tspo               | translocator protein                                                                                   |
| A_15_P132291 | ZDB-GENE-040426-1787 | 1.473 | 0.006 | pcbd1              | 6-pyruvoyl-tetrahydropterin synthase/dimerization cofactor of hepatocyte nuclear factor 1 alpha (TCF1) |
| A_15_P629831 | ZDB-GENE-081022-117  | 0.356 | 0     | fam20a             | family with sequence similarity 20, member A                                                           |
| A_15_P492892 | NA                   | 0.471 | 0.003 | LOC100333759       | Cl119 protein-like                                                                                     |
| A_15_P629516 | ZDB-GENE-060526-337  | 1.398 | 0.011 | pja2               | praja ring finger 2                                                                                    |
| A_15_P106474 | ZDB-GENE-030131-9049 | 1.434 | 0.033 | mbd2               | methyl-CpG binding domain protein 2                                                                    |
| A_15_P159251 | ZDB-GENE-030131-8026 | 1.711 | 0.012 | ENSDART00000091151 | NEL-like 2b                                                                                            |
| A_15_P441850 | NA                   | 0.434 | 0.009 | LOC559147          | novel protein similar to vertebrate hairy and enhancer of split 2 (Drosophila) (HES2)                  |
| A_15_P120684 | ZDB-GENE-061110-91   | 1.378 | 0.042 | srl                | sarcalumenin                                                                                           |
| A_15_P101132 | ZDB-GENE-050227-9    | 0.371 | 0.001 | LOC554876          | hypothetical protein LOC554876, zgc:113424                                                             |
| A_15_P550982 | NA                   | 0.704 | 0.048 | TC414104           | insulin receptor substrate 1-like                                                                      |
| A_15_P103471 | NA                   | 0.713 | 0.041 | tmem55bb           | transmembrane protein 55B-B                                                                            |
| A_15_P659201 | ZDB-GENE-040426-1565 | 1.524 | 0.019 | acsl4a             | acyl-CoA synthetase long-chain family member 4a                                                        |
| A_15_P759241 | NA                   | 0.484 | 0.001 | NP13318878         | hypothetical protein LOC100334946, hypothetical protein LOC100329712                                   |
| A_15_P149346 | ZDB-GENE-030131-9654 | 2.204 | 0     | aatf               | apoptosis antagonizing transcription factor                                                            |
| A_15_P774626 | NA                   | 0.38  | 0.002 | TC415144           | mCG142610-like, zinc finger protein 53-like                                                            |
| A_15_P174891 | ZDB-GENE-020829-1    | 0.576 | 0.006 | sim1a              | single-minded homolog 1a (Drosophila)                                                                  |
| A_15_P749416 | ZDB-GENE-010508-1    | 1.428 | 0.04  | bcmo1              | beta-carotene 15,15'-monooxygenase 1                                                                   |

|              |                      |       |       |                    |                                                                           |
|--------------|----------------------|-------|-------|--------------------|---------------------------------------------------------------------------|
| A_15_P104116 | ZDB-GENE-040426-2828 | 0.607 | 0.001 | zgc:55521          | zgc:55521                                                                 |
| A_15_P731906 | ZDB-GENE-030822-1    | 0.457 | 0.002 | tuba1              | tubulin, alpha 1                                                          |
| A_15_P737241 | ZDB-GENE-030131-1291 | 0.611 | 0.002 | rpl3               | ribosomal protein L3                                                      |
| A_15_P107835 | ZDB-GENE-040426-1643 | 0.411 | 0.005 | mfsd4a             | major facilitator superfamily domain containing 4a                        |
| A_15_P764106 | NA                   | 1.541 | 0.031 | TC417230           | hypothetical protein LOC402861                                            |
| A_15_P740246 | ZDB-GENE-060809-5    | 0.466 | 0.011 | si:ch211-251b21.1  | si:ch211-251b21.1                                                         |
| A_15_P728391 | ZDB-GENE-030131-5926 | 1.804 | 0.006 | si:dkey-177p2.6    | si:dkey-177p2.6                                                           |
| A_15_P576397 | ZDB-GENE-040426-2172 | 0.491 | 0.001 | junb               | jun B proto-oncogene                                                      |
| A_15_P114278 | ZDB-GENE-041007-3    | 1.54  | 0.026 | twistnb            | TWIST neighbor                                                            |
| A_15_P473850 | ZDB-GENE-070719-5    | 0.58  | 0.005 | zgc:165647         | zgc:165647                                                                |
| A_15_P629966 | ZDB-GENE-080220-26   | 0.148 | 0     | zgc:172194         | zgc:172194                                                                |
| A_15_P149661 | ZDB-GENE-050523-1    | 0.583 | 0.038 | gli2b              | GLI-Kruppel family member GLI2b                                           |
| A_15_P721721 | ZDB-GENE-041114-44   | 0.727 | 0.049 | zgc:103720         | zgc:103720                                                                |
| A_15_P664896 | NA                   | 0.433 | 0.018 | zgc:77778          | zgc:77778, hypothetical protein LOC796447                                 |
| A_15_P216721 | NA                   | 0.614 | 0.021 | EH503006           | hypothetical protein LOC100335008                                         |
| A_15_P102585 | NA                   | 1.451 | 0.045 | LOC560136          | armadillo repeat containing 3-like                                        |
| A_15_P105042 | ZDB-GENE-030616-267  | 5.127 | 0.002 | phlda3             | pleckstrin homology-like domain, family A, member 3                       |
| A_15_P101278 | ZDB-GENE-040426-2776 | 1.454 | 0.038 | zc3h7              | zinc finger CCCH-type containing 7A                                       |
| A_15_P131691 | ZDB-GENE-990415-72   | 1.591 | 0.026 | fgf8a              | fibroblast growth factor 8 a                                              |
| A_15_P352345 | NA                   | 0.564 | 0.01  | ENSDART00000113686 | solble guanylyl cyclase alpha2 subunit-like                               |
| A_15_P273781 | ZDB-GENE-061103-301  | 4.582 | 0.015 | zgc:154020         | zgc:154020                                                                |
| A_15_P189296 | ZDB-GENE-040511-1    | 0.395 | 0.023 | ela2l              | elastase 2 like                                                           |
| A_15_P157636 | ZDB-GENE-030131-8324 | 1.839 | 0.005 | ENSDART00000100903 | si:dkey-242g16.2                                                          |
| A_15_P104091 | NA                   | 1.607 | 0.011 | ddx52              | DEAD (Asp-Glu-Ala-Asp) box polypeptide 52, hypothetical protein LOC792150 |
| A_15_P684717 | ZDB-GENE-030131-6103 | 0.474 | 0.001 | TC427205           | wu:fi34e01                                                                |
| A_15_P132321 | ZDB-GENE-020419-4    | 0.374 | 0     | mcm3               | MCM3 minichromosome maintenance deficient 3 (S. cerevisiae)               |
| A_15_P654986 | ZDB-GENE-040426-2570 | 1.438 | 0.011 | tmed7              | transmembrane emp24 protein transport domain containing 7                 |
| A_15_P722981 | ZDB-GENE-050417-398  | 1.629 | 0.026 | zgc:110154         | zgc:110154                                                                |
| A_15_P379305 | NA                   | 0.547 | 0.019 | NP13323043         | carbohydrate (chondroitin 4) sulfotransferase 12-like                     |
| A_15_P160631 | ZDB-GENE-070209-211  | 0.613 | 0.013 | zufsp              | zinc finger with UFM1-specific peptidase domain                           |

|              |                      |       |       |                    |                                                                                          |
|--------------|----------------------|-------|-------|--------------------|------------------------------------------------------------------------------------------|
| A_15_P140746 | ZDB-GENE-040426-1825 | 0.566 | 0.004 | irx4a              | iroquois homeobox protein 4a                                                             |
| A_15_P368750 | ZDB-GENE-090313-341  | 1.456 | 0.033 | si:dkey-7c22.2     | si:dkey-7c22.2                                                                           |
| A_15_P150856 | ZDB-GENE-030131-9909 | 0.681 | 0.029 | sipa111            | signal-induced proliferation-associated 1 like 1                                         |
| A_15_P287651 | NA                   | 0.397 | 0     | hcn4               | hyperpolarization activated cyclic nucleotide-gated potassium channel 4                  |
| A_15_P160816 | ZDB-GENE-041014-249  | 0.424 | 0     | slc10a4            | solute carrier family 10 (sodium/bile acid cotransporter family), member 4               |
| A_15_P135581 | NA                   | 1.405 | 0.049 | ENSDART00000062272 | 5-formyltetrahydrofolate cyclo-ligase-like                                               |
| A_15_P500257 | NA                   | 0.552 | 0.008 | hbae1              | hypothetical protein LOC100334951, hypothetical protein LOC100329238                     |
| A_15_P109357 | ZDB-GENE-040801-167  | 0.245 | 0.034 | zgc:92868          | zgc:92868                                                                                |
| A_15_P531952 | ZDB-GENE-060803-1    | 0.65  | 0.02  | ahi1               | Abelson helper integration site 1                                                        |
| A_15_P654596 | ZDB-GENE-060531-109  | 0.471 | 0.001 | slc2a15a           | solute carrier family 2 (facilitated glucose transporter), member 15a                    |
| A_15_P165471 | NA                   | 1.719 | 0.016 | ENSDART00000098452 | serine/threonine protein kinase pim-2-like                                               |
| A_15_P112922 | ZDB-GENE-050126-2    | 0.66  | 0.042 | ENSDART00000101035 | flavoprotein oxidoreductase MICAL3                                                       |
| A_15_P716546 | NA                   | 2.737 | 0.008 | TC447201           | slit homolog 3-like                                                                      |
| A_15_P620336 | ZDB-GENE-050306-47   | 1.439 | 0.039 | zgc:112964         | zgc:112964                                                                               |
| A_15_P106067 | ZDB-GENE-040426-2532 | 0.623 | 0.006 | zgc:77033          | zgc:77033                                                                                |
| A_15_P200341 | ZDB-GENE-010306-3    | 1.594 | 0.014 | slit2              | slit (Drosophila) homolog 2                                                              |
| A_15_P158186 | ZDB-GENE-040108-4    | 0.677 | 0.038 | si:dkey-263l2.1    | si:dkey-263l2.1                                                                          |
| A_15_P319166 | ZDB-GENE-041008-167  | 1.502 | 0.01  | ENSDART00000115094 | im:7138837                                                                               |
| A_15_P539052 | ZDB-GENE-050411-52   | 0.738 | 0.043 | si:ch211-198n5.11  | si:ch211-198n5.11                                                                        |
| A_15_P593107 | ZDB-GENE-080204-99   | 0.618 | 0.005 | zgc:171837         | zgc:171837                                                                               |
| A_15_P195831 | ZDB-GENE-040426-1473 | 3.267 | 0     | rasd1              | RAS, dexamethasone-induced 1                                                             |
| A_15_P151491 | ZDB-GENE-020419-24   | 0.506 | 0.009 | mcm2               | MCM2 minichromosome maintenance deficient 2, mitotin (S. cerevisiae)                     |
| A_15_P110834 | ZDB-GENE-040426-2096 | 0.667 | 0.029 | zgc:76871          | zgc:76871                                                                                |
| A_15_P162396 | ZDB-GENE-040724-173  | 1.7   | 0.035 | rsph3              | radial spoke head 3 homolog (Chlamydomonas)                                              |
| A_15_P724566 | ZDB-GENE-040718-271  | 1.434 | 0.025 | zgc:92799          | zgc:92799                                                                                |
| A_15_P114154 | ZDB-GENE-040426-2132 | 2.528 | 0.013 | mmp9               | matrix metalloproteinase 9                                                               |
| A_15_P102942 | ZDB-GENE-060421-5612 | 0.734 | 0.044 | elovl2             | elongation of very long chain fatty acids (FEN1/Elo2, SUR4/Elo3, yeast)-like 2           |
| A_15_P368000 | ZDB-GENE-060503-291  | 0.636 | 0.024 | si:ch211-152c12.2  | si:ch211-152c12.2                                                                        |
| A_15_P180043 | NA                   | 0.57  | 0.022 | LOC564461          | glutamate receptor, metabotropic 7-like                                                  |
| A_15_P659191 | ZDB-GENE-050522-334  | 1.5   | 0.018 | alg3               | asparagine-linked glycosylation 3 homolog (S. cerevisiae, alpha-1,3-mannosyltransferase) |



|              |                      |       |       |                    |                                                                                          |
|--------------|----------------------|-------|-------|--------------------|------------------------------------------------------------------------------------------|
| A_15_P624831 | ZDB-GENE-070112-1852 | 2.813 | 0.004 | fev                | FEV (ETS oncogene family)                                                                |
| A_15_P191536 | ZDB-GENE-030131-3167 | 1.909 | 0.008 | si:zfos-47c12.1    | si:zfos-47c12.1                                                                          |
| A_15_P630831 | ZDB-GENE-050417-421  | 1.484 | 0.013 | myl10              | myosin, light chain 10, regulatory                                                       |
| A_15_P238806 | NA                   | 0.65  | 0.05  | LOC568161          | novel protein similar to vertebrate AT rich interactive domain containing protein family |
| A_15_P197176 | ZDB-GENE-030131-2527 | 2.076 | 0.001 | si:dkey-33c12.4    | si:dkey-33c12.4                                                                          |
| A_15_P736806 | ZDB-GENE-030131-7523 | 1.71  | 0.002 | bcl6ab             | B-cell CLL/lymphoma 6a, genome duplicate b                                               |
| A_15_P120055 | NA                   | 0.559 | 0.024 | LOC553395          | hypothetical protein LOC553395                                                           |
| A_15_P591292 | ZDB-GENE-030131-1882 | 1.84  | 0.01  | wu:fb83e09         | wu:fb83e09                                                                               |
| A_15_P696966 | NA                   | 1.531 | 0.01  | EV756135           | hypothetical LOC100150557                                                                |
| A_15_P246451 | NA                   | 1.775 | 0.002 | LOC100148744       | similar to inositol 1,3,4-triphosphate 5/6 kinase                                        |
| A_15_P295551 | ZDB-GENE-081105-180  | 1.934 | 0     | si:dkey-57a22.7    | si:dkey-57a22.7                                                                          |
| A_15_P766161 | ZDB-GENE-040426-1870 | 12.13 | 0.001 | rlbp1b             | retinaldehyde binding protein 1b                                                         |
| A_15_P628976 | ZDB-GENE-001030-4    | 0.565 | 0.011 | pax2b              | paired box gene 2b                                                                       |
| A_15_P654276 | ZDB-GENE-030131-4918 | 1.395 | 0.047 | myl9l              | myosin, light polypeptide 9, like                                                        |
| A_15_P103473 | ZDB-GENE-010110-1    | 0.574 | 0.008 | hsd17b8            | hydroxysteroid (17-beta) dehydrogenase 8                                                 |
| A_15_P671931 | ZDB-GENE-070912-619  | 0.724 | 0.037 | si:dkey-97a13.9    | si:dkey-97a13.9                                                                          |
| A_15_P148556 | ZDB-GENE-060421-5714 | 1.41  | 0.042 | zgc:136263         | zgc:136263                                                                               |
| A_15_P271161 | ZDB-GENE-061218-2    | 7.06  | 0     | ENSDART00000086206 | ataxin 1a                                                                                |
| A_15_P117075 | ZDB-GENE-000405-1    | 0.545 | 0.01  | pbx1a              | pre-B-cell leukemia transcription factor 1a                                              |
| A_15_P366285 | ZDB-GENE-040426-1003 | 1.612 | 0.002 | zgc:56376          | zgc:56376                                                                                |
| A_15_P621506 | ZDB-GENE-050417-430  | 0.7   | 0.014 | zgc:110659         | zgc:110659                                                                               |
| A_15_P740504 | ZDB-GENE-030131-7249 | 1.754 | 0.01  | zgc:165571         | zgc:165571                                                                               |
| A_15_P267396 | NA                   | 0.48  | 0.013 | ENSDART00000050528 | tyrosinase-related protein 1-like                                                        |
| A_15_P111583 | ZDB-GENE-040801-140  | 1.346 | 0.032 | ifrd2              | interferon-related developmental regulator 2                                             |
| A_15_P104595 | ZDB-GENE-040426-1856 | 0.467 | 0.001 | hnmp1              | heterogeneous nuclear ribonucleoprotein H1                                               |
| A_15_P117382 | ZDB-GENE-040426-1384 | 0.694 | 0.029 | gorab              | golgin, rab6-interacting                                                                 |
| A_15_P118446 | ZDB-GENE-051127-43   | 0.486 | 0.013 | zgc:123203         | zgc:123203                                                                               |
| A_15_P246956 | NA                   | 0.499 | 0.007 | ENSDART00000097543 | B-cell CLL/lymphoma 11A-like                                                             |
| A_15_P172376 | ZDB-GENE-040801-111  | 0.531 | 0.002 | suv39h1a           | suppressor of variegation 3-9 homolog 1a                                                 |
| A_15_P152381 | ZDB-GENE-060929-424  | 1.428 | 0.012 | zdhhc18            | zinc finger, DHHC-type containing 18                                                     |

|              |                      |       |       |                    |                                                                              |
|--------------|----------------------|-------|-------|--------------------|------------------------------------------------------------------------------|
| A_15_P109988 | ZDB-GENE-030131-9792 | 0.586 | 0.035 | mbd3b              | methyl-CpG binding domain protein 3b                                         |
| A_15_P377580 | ZDB-GENE-041111-204  | 0.777 | 0.042 | zgc:158138         | zgc:158138                                                                   |
| A_15_P491857 | NA                   | 1.816 | 0.033 | LOC100002406       | putative thymic stromal co-transporter TSCOT-like                            |
| A_15_P193311 | ZDB-GENE-070410-131  | 0.666 | 0.01  | zgc:163057         | zgc:163057                                                                   |
| A_15_P367395 | ZDB-GENE-030826-24   | 1.946 | 0.048 | uox                | urate oxidase                                                                |
| A_15_P490397 | NA                   | 1.566 | 0.011 | ENSDART00000111482 | PH domain leucine-rich repeat protein phosphatase 1-like                     |
| A_15_P101747 | ZDB-GENE-030131-1301 | 1.594 | 0.024 | trabd              | TraB domain containing                                                       |
| A_15_P108706 | ZDB-GENE-030131-7782 | 1.525 | 0.027 | wu:fj34c03         | wu:fj34c03                                                                   |
| A_15_P175576 | ZDB-GENE-030131-8210 | 0.726 | 0.031 | loxl3              | LOXL3 protein, lysyl oxidase-like 3b                                         |
| A_15_P163311 | ZDB-GENE-070410-100  | 2.207 | 0.006 | ncapg2             | non-SMC condensin II complex, subunit G2                                     |
| A_15_P684391 | NA                   | 4.027 | 0     | EB983700           | phosphatidylinositol-specific phospholipase C, X domain containing 1-like    |
| A_15_P179416 | ZDB-GENE-070928-30   | 0.644 | 0.03  | zgc:171763         | zgc:171763                                                                   |
| A_15_P558252 | ZDB-GENE-070912-416  | 0.548 | 0.008 | ENSDART00000110734 | si:dkey-193b15.8                                                             |
| A_15_P635461 | ZDB-GENE-060825-170  | 0.53  | 0.003 | zgc:153405         | zgc:153405                                                                   |
| A_15_P289506 | NA                   | 0.66  | 0.045 | NP13316445         | somatostatin receptor 2-like                                                 |
| A_15_P119862 | NA                   | 0.532 | 0.005 | ENSDART00000114108 | hypothetical LOC407660                                                       |
| A_15_P530387 | ZDB-GENE-040718-232  | 1.689 | 0.016 | tspan18a           | tetraspanin 18a                                                              |
| A_15_P197391 | ZDB-GENE-040426-1046 | 3.631 | 0     | vrk2               | vaccinia related kinase 2                                                    |
| A_15_P519617 | NA                   | 0.657 | 0.043 | EH549846           | CG3407-like                                                                  |
| A_15_P457225 | ZDB-GENE-040426-2411 | 1.408 | 0.025 | zgc:77421          | uracil phosphoribosyltransferase (FUR1) homolog (S. cerevisiae)              |
| A_15_P115604 | ZDB-GENE-040426-2033 | 0.554 | 0.004 | slc35e1            | solute carrier family 35, member E1                                          |
| A_15_P102996 | ZDB-GENE-040426-1388 | 0.315 | 0.018 | ggt1               | gamma-glutamyltransferase 1                                                  |
| A_15_P105778 | ZDB-GENE-021231-1    | 0.506 | 0.019 | igfbp1a            | insulin-like growth factor binding protein 1a                                |
| A_15_P115145 | ZDB-GENE-060825-55   | 0.525 | 0.023 | hes2.2             | hairy and enhancer of split 2.2                                              |
| A_15_P744506 | ZDB-GENE-030616-161  | 1.432 | 0.046 | pa2g4a             | proliferation-associated 2G4, a                                              |
| A_15_P736521 | ZDB-GENE-040912-165  | 2.58  | 0     | irf9               | interferon regulatory factor 9                                               |
| A_15_P117817 | ZDB-GENE-050506-86   | 1.865 | 0.012 | im:6904863         | im:6904863                                                                   |
| A_15_P298111 | ZDB-GENE-070424-71   | 1.59  | 0.038 | zgc:162495         | zgc:162495                                                                   |
| A_15_P555532 | NA                   | 0.399 | 0.003 | ENSDART00000114394 | novel protein with a NACHT domain                                            |
| A_15_P115947 | ZDB-GENE-020711-1    | 1.67  | 0.003 | mycn               | v-myc myelocytomatosis viral related oncogene, neuroblastoma derived (avian) |

|              |                      |       |       |                    |                                                                                                                                               |
|--------------|----------------------|-------|-------|--------------------|-----------------------------------------------------------------------------------------------------------------------------------------------|
| A_15_P584622 | ZDB-GENE-050522-229  | 2.213 | 0.003 | zgc:112165         | zgc:112165                                                                                                                                    |
| A_15_P235701 | ZDB-GENE-060804-3    | 0.133 | 0     | rpl22l1            | ribosomal protein L22-like 1                                                                                                                  |
| A_15_P256286 | ZDB-GENE-060929-918  | 1.641 | 0.002 | zgc:154067         | zgc:154067                                                                                                                                    |
| A_15_P150101 | ZDB-GENE-050522-366  | 0.619 | 0.043 | zgc:110064         | zgc:110064                                                                                                                                    |
| A_15_P630861 | NA                   | 1.644 | 0.03  | LOC568915          | novel protein similar to H.sapiens GALNTL6, UDP-N-acetyl-alpha-D-galactosamine:polypeptide N-acetylgalactosaminyltransferase-like 6 (GALNTL6) |
| A_15_P757066 | ZDB-GENE-030131-7384 | 1.87  | 0     | ube2d2             | ubiquitin-conjugating enzyme E2D 2 (UBC4/5 homolog, yeast)                                                                                    |
| A_15_P152206 | ZDB-GENE-040426-2772 | 0.583 | 0.022 | hdac8              | histone deacetylase 8                                                                                                                         |
| A_15_P146331 | ZDB-GENE-030912-6    | 1.606 | 0.004 | stk36              | serine/threonine kinase 36 (fused homolog, Drosophila)                                                                                        |
| A_15_P156146 | ZDB-GENE-080204-44   | 1.944 | 0.007 | zgc:172115         | tumor necrosis factor (ligand) superfamily, member 13b                                                                                        |
| A_15_P187536 | NA                   | 0.751 | 0.048 | LOC569097          | hypothetical LOC569097                                                                                                                        |
| A_15_P188841 | ZDB-GENE-040513-2    | 3.876 | 0     | accn2b             | amiloride-sensitive cation channel 2 b                                                                                                        |
| A_15_P100913 | ZDB-GENE-990415-66   | 0.571 | 0.005 | efna2              | ephrin A2                                                                                                                                     |
| A_15_P112182 | ZDB-GENE-980605-4    | 1.676 | 0.012 | foxd5              | forkhead box D5                                                                                                                               |
| A_15_P547232 | ZDB-GENE-081119-4    | 1.388 | 0.036 | frem2b             | Fras1 related extracellular matrix protein 2b                                                                                                 |
| A_15_P112693 | ZDB-GENE-031030-4    | 1.581 | 0.003 | tob1a              | transducer of ERBB2, 1a                                                                                                                       |
| A_15_P150361 | ZDB-GENE-000926-1    | 0.49  | 0.023 | atoh7              | atonal homolog 7                                                                                                                              |
| A_15_P212091 | ZDB-GENE-980526-52   | 0.519 | 0.009 | ENSDART00000014350 | paired box gene 3a                                                                                                                            |
| A_15_P146436 | NA                   | 0.445 | 0.001 | LOC555216          | CG4324-like                                                                                                                                   |
| A_15_P120913 | ZDB-GENE-980526-561  | 1.409 | 0.04  | myod1              | myogenic differentiation 1                                                                                                                    |
| A_15_P115769 | ZDB-GENE-030130-1    | 0.656 | 0.029 | epb41              | erythrocyte membrane protein band 4.1 (elliptocytosis 1, RH-linked)                                                                           |
| A_15_P366905 | ZDB-GENE-030828-5    | 0.646 | 0.005 | hes6               | hairy and enhancer of split 6 (Drosophila)                                                                                                    |
| A_15_P158651 | ZDB-GENE-041210-9    | 1.785 | 0.007 | si:ch211-51e12.3   | si:ch211-51e12.3                                                                                                                              |
| A_15_P297851 | NA                   | 1.668 | 0.01  | LOC566605          | serine/arginine-rich protein specific kinase 3-like                                                                                           |
| A_15_P638061 | ZDB-GENE-040426-1650 | 1.571 | 0.019 | btf3l4             | basic transcription factor 3-like 4                                                                                                           |
| A_15_P121107 | ZDB-GENE-050302-175  | 0.48  | 0     | hapln1a            | hyaluronan and proteoglycan link protein 1a                                                                                                   |
| A_15_P106513 | ZDB-GENE-030131-6110 | 0.734 | 0.047 | TC406329           | si:ch211-208h7.4                                                                                                                              |
| A_15_P689231 | NA                   | 1.651 | 0.043 | TC378859           | ubiquitin specific protease 43-like                                                                                                           |
| A_15_P727556 | ZDB-GENE-040718-323  | 1.779 | 0.027 | zgc:92723          | zgc:92723                                                                                                                                     |
| A_15_P170221 | ZDB-GENE-070209-256  | 1.467 | 0.021 | zgc:158766         | zgc:158766                                                                                                                                    |
| A_15_P188456 | NA                   | 1.551 | 0.012 | LOC100008368       | RUN domain containing 3A                                                                                                                      |

|              |                                           |       |       |                    |                                                                           |
|--------------|-------------------------------------------|-------|-------|--------------------|---------------------------------------------------------------------------|
| A_15_P663781 | ZDB-GENE-060503-207                       | 1.562 | 0.02  | kat2b              | K(lysine) acetyltransferase 2B                                            |
| A_15_P629906 | ZDB-GENE-050417-428                       | 1.812 | 0.023 | zgc:113106         | zgc:113106                                                                |
| A_15_P207426 | ZDB-GENE-060825-27                        | 0.688 | 0.024 | slc27a6            | solute carrier family 27 (fatty acid transporter), member 6               |
| A_15_P109058 | ZDB-GENE-040426-818                       | 1.341 | 0.045 | srp54              | signal recognition particle 54                                            |
| A_15_P148426 | ZDB-GENE-050327-45                        | 1.549 | 0.049 | zgc:113255         | zgc:113255                                                                |
| A_15_P671076 | ZDB-GENE-031118-36                        | 1.717 | 0.028 | hist2h2l           | histone 2, H2, like                                                       |
| A_15_P284621 | ZDB-GENE-030131-1998                      | 0.63  | 0.039 | wu:fb94b04         | wu:fb94b04                                                                |
| A_15_P256311 | ZDB-GENE-010724-15                        | 0.543 | 0.001 | rps9               | ribosomal protein S9                                                      |
| A_15_P681491 | NA                                        | 0.695 | 0.009 | XR_029032          | sex comb on midleg-like 2-like                                            |
| A_15_P101056 | ZDB-GENE-050522-70                        | 1.628 | 0.043 | zgc:110463         | zgc:110463                                                                |
| A_15_P101039 | ZDB-GENE-000509-1                         | 0.39  | 0     | arntl1a            | aryl hydrocarbon receptor nuclear translocator-like 1a                    |
| A_15_P151281 | NA                                        | 1.957 | 0.002 | LOC565548          | similar to LOC495946 protein                                              |
| A_15_P161931 | ZDB-GENE-020416-3                         | 0.63  | 0.011 | tpi1a              | triosephosphate isomerase 1a                                              |
| A_15_P185766 | NA                                        | 0.605 | 0.008 | LOC566922          | gamma-aminobutyric acid (GABA) A receptor, beta 3-like                    |
| A_15_P638926 | NA                                        | 0.597 | 0.02  | pts                | 6-pyruvoyltetrahydropterin synthase, 6-pyruvoyl tetrahydropterin synthase |
| A_15_P172576 | ZDB-GENE-070319-1                         | 0.605 | 0.011 | rbpjb              | recombination signal binding protein for immunoglobulin kappa J region b  |
| A_15_P627141 | ZDB-GENE-070410-9                         | 3.231 | 0     | zgc:158463         | zgc:158463                                                                |
| A_15_P372020 | NA                                        | 0.572 | 0.002 | TC381385           | zinc finger protein 324-like                                              |
| A_15_P460460 | ZDB-GENE-080327-20                        | 0.703 | 0.031 | sc:d0350           | sc:d0350                                                                  |
| A_15_P171836 | ZDB-GENE-040426-1501                      | 4.199 | 0     | gadd45aa           | growth arrest and DNA-damage-inducible, alpha, a                          |
| A_15_P733324 | ZDB-GENE-080724-3                         | 1.672 | 0.009 | zgc:195056         | zgc:195056                                                                |
| A_15_P119885 | ZDB-GENE-040712-6                         | 0.688 | 0.009 | ccm2               | cerebral cavernous malformation 2                                         |
| A_15_P207346 | ZDB-GENE-060503-93                        | 0.654 | 0.027 | lctlb              | lactase-like b                                                            |
| A_15_P499657 | NA                                        | 2.052 | 0.013 | LOC557716          | hypothetical LOC557716                                                    |
| A_15_P671281 | ZDB-GENE-030131-4145                      | 1.282 | 0.048 | TC425065           | si:dkey-175m17.8                                                          |
| A_15_P448165 | ZDB-GENE-041001-43,<br>ZDB-GENE-980526-79 | 0.565 | 0.039 | si:xx-by187g17.1   | si:xx-by187g17.1, hemoglobin alpha adult-1                                |
| A_15_P196746 | NA                                        | 1.428 | 0.014 | LOC565295          | LAG1 homolog, ceramide synthase 5-like                                    |
| A_15_P632836 | ZDB-GENE-050417-96                        | 1.371 | 0.037 | psmd4b             | proteasome (prosome, macropain) 26S subunit, non-ATPase, 4b               |
| A_15_P400960 | NA                                        | 0.653 | 0.046 | ENSDART00000111040 | novel protein similar to vertebrate tet oncogene family member 3 (TET3)   |
| A_15_P150156 | ZDB-GENE-040426-2017                      | 1.68  | 0.021 | hk2                | hexokinase 2                                                              |

|              |                      |       |       |                    |                                                                           |
|--------------|----------------------|-------|-------|--------------------|---------------------------------------------------------------------------|
| A_15_P727611 | ZDB-GENE-030131-5304 | 0.553 | 0.006 | hlx1               | H2.0-like homeo box 1 (Drosophila)                                        |
| A_15_P565492 | ZDB-GENE-030131-6323 | 0.666 | 0.02  | si:dkey-46k9.9     | si:dkey-46k9.9                                                            |
| A_15_P200706 | ZDB-GENE-061207-28   | 0.383 | 0.008 | si:ch211-243a20.3  | si:ch211-243a20.3                                                         |
| A_15_P376010 | NA                   | 0.682 | 0.012 | LOC570044          | transmembrane protein 169-like                                            |
| A_15_P682636 | NA                   | 1.418 | 0.042 | TC408240           | solute carrier family 39 (zinc transporter), member 14-like               |
| A_15_P141481 | ZDB-GENE-030131-9544 | 0.614 | 0.006 | mcm4               | MCM4 minichromosome maintenance deficient 4, mitotin (S. cerevisiae)      |
| A_15_P642668 | NA                   | 2.04  | 0.005 | LOC100003308       | similar to serine protease, hypothetical protein LOC100149563, zgc:173425 |
| A_15_P401780 | ZDB-GENE-050417-163  | 1.46  | 0.045 | nsdhl              | NAD(P) dependent steroid dehydrogenase-like                               |
| A_15_P150886 | ZDB-GENE-071116-1    | 0.705 | 0.024 | epor               | erythropoietin receptor                                                   |
| A_15_P631991 | ZDB-GENE-080917-21   | 0.581 | 0.036 | adrb3a             | adrenergic receptor, beta 3a                                              |
| A_15_P167536 | ZDB-GENE-050420-149  | 0.611 | 0.006 | si:ch211-1e14.1    | si:ch211-1e14.1                                                           |
| A_15_P115376 | ZDB-GENE-081022-37   | 0.75  | 0.023 | zgc:193742         | zgc:193742                                                                |
| A_15_P176236 | ZDB-GENE-030710-10   | 0.459 | 0.01  | gpm6bb             | glycoprotein M6Bb                                                         |
| A_15_P367390 | ZDB-GENE-050417-27   | 1.395 | 0.019 | exosc2             | exosome component 2                                                       |
| A_15_P680306 | NA                   | 1.811 | 0.003 | LOC799537          | similar to serine protease, zgc:173425                                    |
| A_15_P309741 | ZDB-GENE-050411-37   | 0.644 | 0.008 | TC390083           | si:dkey-222k23.1                                                          |
| A_15_P120476 | ZDB-GENE-040625-1    | 1.521 | 0.016 | grem1a             | gremlin 1 homolog a, cysteine knot superfamily (Xenopus laevis)           |
| A_15_P365310 | ZDB-GENE-041212-46   | 0.582 | 0.007 | zgc:101800         | zgc:101800                                                                |
| A_15_P106046 | ZDB-GENE-040426-1810 | 0.653 | 0.02  | insm1a             | insulinoma-associated 1a                                                  |
| A_15_P105581 | ZDB-GENE-040801-135  | 1.542 | 0.017 | zgc:100963         | zgc:100963                                                                |
| A_15_P185481 | NA                   | 0.719 | 0.03  | LOC100148397       | similar to bromodomain adjacent to zinc finger domain, 2B                 |
| A_15_P111592 | NA                   | 0.474 | 0     | ENSDART00000075320 | pre-B cell enhancing factor-like                                          |
| A_15_P631086 | ZDB-GENE-040426-1926 | 0.613 | 0.037 | LOC798111          | novel rhamnose binding lectin, heterogeneous nuclear ribonucleoprotein K  |
| A_15_P186046 | ZDB-GENE-081022-138  | 0.487 | 0.007 | zgc:194658         | zgc:194658                                                                |
| A_15_P167623 | NA                   | 2.169 | 0.04  | LOC794350          | hypothetical LOC794350                                                    |
| A_15_P621291 | ZDB-GENE-040912-84   | 1.872 | 0.008 | mfsd6b             | major facilitator superfamily domain containing 6b                        |
| A_15_P187111 | NA                   | 0.609 | 0.036 | LOC799194          | Tetraspanin 10-like                                                       |
| A_15_P138566 | ZDB-GENE-050208-507  | 0.735 | 0.046 | ENSDART00000105399 | si:dkey-28h18.4                                                           |
| A_15_P119926 | ZDB-GENE-040426-782  | 2     | 0     | mocs3              | molybdenum cofactor synthesis 3                                           |
| A_15_P442860 | ZDB-GENE-081022-122  | 1.686 | 0.009 | im:7154698         | zgc:194539                                                                |

|              |                      |       |       |                  |                                                                                                      |
|--------------|----------------------|-------|-------|------------------|------------------------------------------------------------------------------------------------------|
| A_15_P366120 | ZDB-GENE-040718-361  | 1.524 | 0.012 | tspan33          | tetraspanin 33                                                                                       |
| A_15_P408805 | NA                   | 2.208 | 0.009 | LOC792553        | transmembrane protein 90B-like                                                                       |
| A_15_P745264 | ZDB-GENE-031006-14   | 0.493 | 0.001 | stmn1a           | stathmin 1a                                                                                          |
| A_15_P114898 | ZDB-GENE-010607-3    | 0.379 | 0.006 | cx44.1           | connexin 44.1                                                                                        |
| A_15_P340405 | NA                   | 0.749 | 0.044 | LOC571279        | MAP/microtubule affinity-regulating kinase 3-like                                                    |
| A_15_P121251 | ZDB-GENE-041203-1    | 0.533 | 0.001 | foxp1b           | forkhead box P1b                                                                                     |
| A_15_P668461 | ZDB-GENE-071004-51   | 1.67  | 0.005 | LOC797799        | similar to serine protease, zgc:173425                                                               |
| A_15_P116610 | ZDB-GENE-030131-647  | 0.429 | 0.002 | phgdh            | phosphoglycerate dehydrogenase                                                                       |
| A_15_P392500 | NA                   | 2.558 | 0     | LOC553492        | hypothetical protein LOC553492                                                                       |
| A_15_P196416 | ZDB-GENE-030326-2    | 0.706 | 0.047 | prdx2            | peroxiredoxin 2                                                                                      |
| A_15_P101193 | ZDB-GENE-990415-151  | 0.737 | 0.047 | mxi1             | max interacting protein                                                                              |
| A_15_P193161 | NA                   | 0.682 | 0.008 | LOC566830        | novel protein similar to vertebrate protein phosphatase 1, regulatory (inhibitor) subunit 8 (PPP1R8) |
| A_15_P624576 | ZDB-GENE-040401-1    | 1.329 | 0.04  | pou4f2           | POU domain, class 4, transcription factor 2                                                          |
| A_15_P492597 | ZDB-GENE-081205-5    | 1.72  | 0.035 | zgc:172302       | zgc:172302                                                                                           |
| A_15_P410985 | NA                   | 1.526 | 0.046 | mfn1             | mitofusin 1, similar to Mitofusin 1                                                                  |
| A_15_P552692 | ZDB-GENE-041010-176  | 2.339 | 0.026 | zgc:101685       | thiamin pyrophosphokinase 1                                                                          |
| A_15_P628676 | ZDB-GENE-081022-103  | 0.577 | 0.024 | zgc:194314       | zgc:194314                                                                                           |
| A_15_P121084 | ZDB-GENE-090521-4    | 1.547 | 0.019 | TC375658         | leucine zipper-EF-hand containing transmembrane protein 2                                            |
| A_15_P501587 | NA                   | 0.624 | 0.006 | LOC798051        | ANKRD32 protein-like                                                                                 |
| A_15_P148496 | ZDB-GENE-990415-201  | 0.414 | 0     | pax7a            | paired box gene 7a                                                                                   |
| A_15_P131296 | ZDB-GENE-080616-1    | 0.724 | 0.037 | prdm13           | PR domain containing 13                                                                              |
| A_15_P200256 | ZDB-GENE-001030-2    | 1.467 | 0.031 | pax5             | paired box gene 5                                                                                    |
| A_15_P173741 | ZDB-GENE-030131-9735 | 1.496 | 0.025 | angptl6          | angiopoietin-like 6                                                                                  |
| A_15_P730246 | ZDB-GENE-990708-8    | 0.494 | 0.008 | ucp2             | uncoupling protein 2                                                                                 |
| A_15_P184576 | ZDB-GENE-041014-340  | 0.668 | 0.02  | si:dkey-221h15.4 | si:dkey-221h15.4                                                                                     |
| A_15_P104386 | ZDB-GENE-030131-3825 | 2.375 | 0.001 | zgc:162591       | zgc:162591                                                                                           |
| A_15_P621796 | ZDB-GENE-050522-333  | 1.89  | 0.001 | zgc:112397       | zgc:112397                                                                                           |
| A_15_P117765 | ZDB-GENE-040426-2670 | 2.368 | 0.003 | sc4mol           | sterol-C4-methyl oxidase-like                                                                        |
| A_15_P172551 | ZDB-GENE-030131-8103 | 1.993 | 0     | optn             | optineurin                                                                                           |
| A_15_P187361 | ZDB-GENE-060518-3    | 0.644 | 0.024 | gcat             | glycine C-acetyltransferase                                                                          |

|              |                      |       |       |                    |                                                                     |
|--------------|----------------------|-------|-------|--------------------|---------------------------------------------------------------------|
| A_15_P245951 | NA                   | 0.651 | 0.023 | TC391757           | aarF domain containing kinase 1-like                                |
| A_15_P432965 | ZDB-GENE-041008-78   | 1.895 | 0.022 | polr2a             | polymerase (RNA) II (DNA directed) polypeptide A                    |
| A_15_P140906 | ZDB-GENE-061215-62   | 0.726 | 0.04  | zgc:158394         | zgc:158394                                                          |
| A_15_P143346 | ZDB-GENE-050227-1    | 2.041 | 0.007 | fbxl22             | F-box and leucine-rich repeat protein 22                            |
| A_15_P171901 | ZDB-GENE-041001-160  | 0.645 | 0.026 | si:dkey-183n20.15  | si:dkey-183n20.15                                                   |
| A_15_P489352 | NA                   | 1.366 | 0.037 | ENSDART00000108710 | leucine rich repeat containing 8 family, member C-like              |
| A_15_P374790 | NA                   | 0.546 | 0.027 | TC409066           | MGC85590 protein-like                                               |
| A_15_P100665 | ZDB-GENE-041114-22   | 0.584 | 0.033 | suv420h1           | suppressor of variegation 4-20 homolog 1 (Drosophila)               |
| A_15_P630806 | ZDB-GENE-030616-157  | 0.679 | 0.006 | pold2              | polymerase (DNA directed), delta 2, regulatory subunit              |
| A_15_P148516 | ZDB-GENE-041212-79   | 1.339 | 0.027 | zdhhc13            | zinc finger, DHHC-type containing 13                                |
| A_15_P105919 | ZDB-GENE-980526-559  | 0.678 | 0.014 | fgf6a              | fibroblast growth factor 6a                                         |
| A_15_P105303 | ZDB-GENE-040426-2220 | 2.511 | 0     | ptp4a3             | protein tyrosine phosphatase type IVA, member 3                     |
| A_15_P660276 | ZDB-GENE-040924-1    | 1.926 | 0.002 | lancl1             | LanC antibiotic synthetase component C-like 1 (bacterial)           |
| A_15_P130736 | ZDB-GENE-030131-2415 | 1.675 | 0.014 | cav1               | caveolin 1                                                          |
| A_15_P179916 | ZDB-GENE-060810-40   | 2.168 | 0.002 | im:7150454         | im:7150454                                                          |
| A_15_P271091 | ZDB-GENE-070410-23   | 0.373 | 0.002 | zgc:162150         | zgc:162150                                                          |
| A_15_P187836 | ZDB-GENE-060503-706  | 0.685 | 0.009 | ENSDART00000083394 | si:dkey-106c17.3                                                    |
| A_15_P192971 | ZDB-GENE-030131-840  | 0.709 | 0.01  | zgc:162293         | zgc:162293                                                          |
| A_15_P721296 | ZDB-GENE-030131-792  | 1.569 | 0.01  | ubxn1              | UBX domain protein 1                                                |
| A_15_P162086 | ZDB-GENE-040115-3    | 1.551 | 0.032 | LOC554962          | DnaJ (Hsp40) homolog, subfamily A, member 3B                        |
| A_15_P504877 | ZDB-GENE-030616-5    | 1.439 | 0.016 | wdr75              | WD repeat domain 75                                                 |
| A_15_P679396 | ZDB-GENE-061013-1    | 2.093 | 0.003 | bcl3               | B-cell CLL/lymphoma 3                                               |
| A_15_P309651 | ZDB-GENE-081022-163  | 1.725 | 0.017 | zgc:194895         | zgc:194895                                                          |
| A_15_P182551 | ZDB-GENE-060503-182  | 1.41  | 0.035 | si:dkeyp-34f6.5    | si:dkeyp-34f6.5                                                     |
| A_15_P532982 | ZDB-GENE-030131-1380 | 2.434 | 0.004 | upb1               | ureidopropionase, beta                                              |
| A_15_P630241 | ZDB-GENE-030102-1    | 1.661 | 0.007 | ttc27              | tetratricopeptide repeat domain 27                                  |
| A_15_P308476 | NA                   | 1.762 | 0.002 | TC392023           | laminin alpha 5-like                                                |
| A_15_P163976 | NA                   | 0.703 | 0.046 | dennd2d            | DENN/MADD domain containing 2D, DENN/MADD domain containing 2D-like |
| A_15_P187861 | ZDB-GENE-071212-3    | 1.528 | 0.006 | flii               | flightless I homolog (Drosophila)                                   |
| A_15_P112669 | ZDB-GENE-040625-113  | 1.395 | 0.026 | zgc:86811          | zgc:86811                                                           |

|              |                                                                                        |       |       |                    |                                                                                                                                             |
|--------------|----------------------------------------------------------------------------------------|-------|-------|--------------------|---------------------------------------------------------------------------------------------------------------------------------------------|
| A_15_P159006 | NA                                                                                     | 0.486 | 0.001 | ENSDART00000102893 | 10-formyltetrahydrofolate dehydrogenase-like                                                                                                |
| A_15_P545232 | NA                                                                                     | 2.654 | 0.006 | NP9864217          | zinc finger protein 432-like                                                                                                                |
| A_15_P145941 | NA                                                                                     | 1.709 | 0.008 | ENSDART00000089173 | ATPase, class I, type 8B, member 1-like                                                                                                     |
| A_15_P108896 | NA                                                                                     | 0.649 | 0.05  | LOC100003064       | hypothetical protein LOC100003064                                                                                                           |
| A_15_P206336 | ZDB-GENE-041010-101                                                                    | 0.71  | 0.049 | zgc:103755         | zgc:103755                                                                                                                                  |
| A_15_P135216 | NA                                                                                     | 0.659 | 0.022 | TC435567           | clathrin, light polypeptide-like                                                                                                            |
| A_15_P297816 | NA                                                                                     | 1.321 | 0.037 | TC390038           | hypothetical LOC564712                                                                                                                      |
| A_15_P529407 | ZDB-GENE-061013-757                                                                    | 2.194 | 0.002 | snai3              | snail homolog 3                                                                                                                             |
| A_15_P183361 | NA                                                                                     | 1.676 | 0.017 | ENSDART00000104764 | F-box protein 6-like                                                                                                                        |
| A_15_P621916 | ZDB-GENE-070127-4                                                                      | 0.347 | 0.002 | lect2l             | leukocyte cell-derived chemotaxin 2 like                                                                                                    |
| A_15_P188011 | ZDB-GENE-030131-657                                                                    | 1.482 | 0.011 | cyth1              | cytohesin 1                                                                                                                                 |
| A_15_P194226 | ZDB-GENE-030131-9045                                                                   | 1.502 | 0.007 | zgc:171980         | zgc:171980                                                                                                                                  |
| A_15_P626596 | ZDB-GENE-041027-1                                                                      | 1.349 | 0.046 | map2k2             | mitogen-activated protein kinase kinase 2                                                                                                   |
| A_15_P268286 | NA                                                                                     | 1.487 | 0.034 | TC434037           | zinc finger protein 300-like                                                                                                                |
| A_15_P205666 | ZDB-GENE-070424-55                                                                     | 0.22  | 0.026 | ftr61              | finTRIM family, member 61                                                                                                                   |
| A_15_P291166 | ZDB-GENE-081104-238                                                                    | 0.601 | 0.016 | nkx3-1             | NK3 homeobox 1                                                                                                                              |
| A_15_P642941 | ZDB-GENE-060421-4643                                                                   | 0.615 | 0.039 | bcl11a             | B-cell CLL/lymphoma 11A                                                                                                                     |
| A_15_P436815 | NA                                                                                     | 0.626 | 0.035 | LOC798089          | G protein regulated inducer of neurite outgrowth 2-like                                                                                     |
| A_15_P624091 | ZDB-GENE-040305-2                                                                      | 1.58  | 0.025 | traf4b             | tnf receptor-associated factor 4b                                                                                                           |
| A_15_P132981 | ZDB-GENE-080724-4,<br>ZDB-GENE-050610-19,<br>ZDB-GENE-050610-20,<br>ZDB-GENE-050610-28 | 0.629 | 0.036 | zgc:193751         | zgc:193751, protocadherin 2 gamma 28, protocadherin 2 gamma 29, protocadherin 2 gamma 6                                                     |
| A_15_P191621 | ZDB-GENE-030131-4459                                                                   | 0.684 | 0.026 | si:dkey-60a16.3    | si:dkey-60a16.3                                                                                                                             |
| A_15_P283451 | ZDB-GENE-070912-187                                                                    | 0.725 | 0.039 | sema5b             | sema domain, seven thrombospondin repeats (type 1 and type 1-like), transmembrane domain (TM) and short cytoplasmic domain, (semaphorin) 5B |
| A_15_P200801 | NA                                                                                     | 0.731 | 0.034 | LOC799742          | phospholipase D family, member 3-like                                                                                                       |
| A_15_P156436 | ZDB-GENE-070718-1                                                                      | 1.609 | 0.007 | enkur              | enkurin, TRPC channel interacting protein                                                                                                   |
| A_15_P141891 | ZDB-GENE-061027-190                                                                    | 0.638 | 0.023 | zgc:153678         | zgc:153678                                                                                                                                  |
| A_15_P268291 | NA                                                                                     | 1.644 | 0.042 | LOC569616          | tripartite motif protein 21-like                                                                                                            |
| A_15_P105960 | ZDB-GENE-041008-213                                                                    | 1.654 | 0.011 | ENSDART00000105189 | si:dkey-240e12.1                                                                                                                            |
| A_15_P113493 | ZDB-GENE-990415-243                                                                    | 0.702 | 0.033 | rxrab              | retinoid x receptor, alpha b                                                                                                                |



|              |                      |       |       |                    |                                                                         |
|--------------|----------------------|-------|-------|--------------------|-------------------------------------------------------------------------|
| A_15_P413140 | NA                   | 1.394 | 0.039 | TC403486           | novel FERM domain containing protein                                    |
| A_15_P406190 | ZDB-GENE-080204-87   | 1.422 | 0.036 | zgc:174863         | zgc:174863                                                              |
| A_15_P119463 | ZDB-GENE-050306-39   | 1.409 | 0.018 | slc25a32b          | solute carrier family 25, member 32b                                    |
| A_15_P281726 | NA                   | 1.507 | 0.02  | LOC566436          | transient receptor potential cation channel, subfamily C, member 4-like |
| A_15_P245936 | ZDB-GENE-070912-369  | 2.513 | 0     | si:dkey-127k13.2   | si:dkey-127k13.2                                                        |
| A_15_P111884 | ZDB-GENE-991229-12   | 1.836 | 0.005 | exorh              | extra-ocular rhodopsin                                                  |
| A_15_P102473 | ZDB-GENE-040724-122  | 2.516 | 0.001 | ak7                | adenylate kinase 7                                                      |
| A_15_P169496 | ZDB-GENE-070615-23   | 1.529 | 0.036 | zgc:165502         | zgc:165502                                                              |
| A_15_P622751 | ZDB-GENE-040614-4    | 0.721 | 0.029 | fabp7b             | fatty acid binding protein 7, brain, b                                  |
| A_15_P682061 | NA                   | 0.695 | 0.01  | TC380654           | F-box and leucine-rich repeat protein 11-like                           |
| A_15_P746331 | ZDB-GENE-080204-46   | 1.402 | 0.034 | zgc:172120         | zgc:172120                                                              |
| A_15_P657346 | ZDB-GENE-051213-1    | 0.628 | 0.034 | rhd                | Rh blood group, D antigen                                               |
| A_15_P119330 | ZDB-GENE-081022-85   | 0.484 | 0.007 | zgc:194246         | zgc:194246                                                              |
| A_15_P170626 | ZDB-GENE-040718-410  | 0.621 | 0.013 | rgs2               | regulator of G-protein signaling 2                                      |
| A_15_P110543 | ZDB-GENE-000208-17   | 0.595 | 0.01  | calr               | calreticulin                                                            |
| A_15_P180096 | ZDB-GENE-080724-12   | 1.789 | 0.037 | kif17              | kinesin family member 17                                                |
| A_15_P120345 | ZDB-GENE-050223-1    | 1.486 | 0.01  | gadd45bb           | growth arrest and DNA-damage-inducible, beta b                          |
| A_15_P268136 | NA                   | 1.604 | 0.01  | TC425778           | uromodulin-like                                                         |
| A_15_P195211 | ZDB-GENE-030131-6247 | 1.354 | 0.048 | orc3l              | origin recognition complex, subunit 3-like (yeast)                      |
| A_15_P141996 | ZDB-GENE-041014-342  | 1.905 | 0.043 | trim54             | tripartite motif-containing 54                                          |
| A_15_P282206 | NA                   | 2.477 | 0.002 | LOC100148522       | Alanine aminotransferase 2-like                                         |
| A_15_P196161 | ZDB-GENE-051120-102  | 1.6   | 0.012 | pm20d1.1           | peptidase M20 domain containing 1, tandem duplicate 1                   |
| A_15_P626261 | ZDB-GENE-040718-338  | 1.469 | 0.031 | egl n1             | egl nine homolog 1 (C. elegans)                                         |
| A_15_P182296 | ZDB-GENE-060503-438  | 1.73  | 0.005 | si:dkey-222b8.4    | si:dkey-222b8.4                                                         |
| A_15_P173856 | ZDB-GENE-050417-142  | 1.73  | 0.012 | zgc:110388         | zgc:110388                                                              |
| A_15_P630281 | ZDB-GENE-041114-181  | 0.151 | 0.004 | zgc:92354          | zgc:92354                                                               |
| A_15_P420265 | ZDB-GENE-030131-7499 | 0.752 | 0.045 | zgc:175287         | tec protein tyrosine kinase                                             |
| A_15_P133241 | NA                   | 0.738 | 0.034 | LOC100001945       | hypothetical protein LOC100001945                                       |
| A_15_P269301 | NA                   | 0.604 | 0.032 | TC367623           | adlican-like                                                            |
| A_15_P567442 | ZDB-GENE-010605-5    | 0.478 | 0.01  | ENSDART00000114951 | apolipoprotein M                                                        |

|              |                                           |       |       |                    |                                                                            |
|--------------|-------------------------------------------|-------|-------|--------------------|----------------------------------------------------------------------------|
| A_15_P142626 | ZDB-GENE-061013-408                       | 1.566 | 0.01  | socs5a             | suppressor of cytokine signaling 5a                                        |
| A_15_P274946 | ZDB-GENE-031002-9                         | 0.488 | 0.001 | ENSDART00000011389 | protein disulfide isomerase family A, member 3                             |
| A_15_P350070 | ZDB-GENE-041111-231                       | 1.493 | 0.034 | mcat               | malonyl CoA:ACP acyltransferase (mitochondrial)                            |
| A_15_P195406 | ZDB-GENE-041014-294                       | 2.111 | 0     | pomcb              | proopiomelanocortin b                                                      |
| A_15_P363525 | NA                                        | 3.602 | 0.005 | LOC100003826       | zinc finger, matrin type 4-like                                            |
| A_15_P626951 | NA                                        | 0.68  | 0.031 | LOC563152          | chemokine CCL-C24a                                                         |
| A_15_P102768 | ZDB-GENE-030131-3539                      | 1.702 | 0.013 | ctsh               | cathepsin H                                                                |
| A_15_P160611 | ZDB-GENE-060929-820                       | 0.587 | 0.01  | zgc:153901         | zgc:153901                                                                 |
| A_15_P202361 | ZDB-GENE-060503-292                       | 1.494 | 0.036 | ENSDART00000105444 | si:dkey-148f10.4                                                           |
| A_15_P196486 | ZDB-GENE-990415-31                        | 0.53  | 0.013 | ncam1              | neural cell adhesion molecule 1                                            |
| A_15_P175066 | ZDB-GENE-051014-1                         | 0.599 | 0.017 | smpd2              | sphingomyelin phosphodiesterase 2, neutral                                 |
| A_15_P112133 | ZDB-GENE-030131-3587                      | 1.603 | 0.007 | si:dkey-8l13.4     | si:dkey-8l13.4                                                             |
| A_15_P112309 | ZDB-GENE-030131-4648                      | 0.528 | 0.033 | si:ch211-102c2.6   | si:ch211-102c2.6                                                           |
| A_15_P150726 | ZDB-GENE-070112-2382                      | 2.031 | 0.004 | zgc:158624         | zgc:158624                                                                 |
| A_15_P119277 | ZDB-GENE-030131-5371                      | 0.715 | 0.044 | ENSDART00000085661 | amyloid beta (A4) precursor protein-binding, family A, member 2 (X11-like) |
| A_15_P109586 | ZDB-GENE-041114-38                        | 1.35  | 0.044 | slc25a44a          | solute carrier family 25, member 44 a                                      |
| A_15_P629136 | ZDB-GENE-000210-32                        | 0.585 | 0.021 | nme2b.1            | non-metastatic cells 2b.1, protein (NM23B) expressed in                    |
| A_15_P711816 | ZDB-GENE-070912-336                       | 1.508 | 0.016 | si:ch73-205f10.1   | si:ch73-205f10.1                                                           |
| A_15_P278861 | ZDB-GENE-081104-413                       | 0.583 | 0.005 | ENSDART00000086672 | transmembrane protein 194B                                                 |
| A_15_P191546 | ZDB-GENE-040724-19                        | 0.647 | 0.025 | cdk19              | cyclin-dependent kinase 19                                                 |
| A_15_P272101 | ZDB-GENE-041210-186                       | 1.313 | 0.04  | slc35e3            | solute carrier family 35, member E3                                        |
| A_15_P490657 | ZDB-GENE-050809-43                        | 1.498 | 0.026 | TC380067           | si:dkey-258f14.3                                                           |
| A_15_P140706 | ZDB-GENE-040910-5                         | 1.499 | 0.031 | rab36              | RAB36, member RAS oncogene family                                          |
| A_15_P764316 | NA                                        | 1.743 | 0.013 | LOC100149015       | hypothetical LOC100149015                                                  |
| A_15_P201206 | ZDB-GENE-070912-386                       | 3.389 | 0     | si:dkey-15i8.3     | si:dkey-15i8.3                                                             |
| A_15_P111375 | ZDB-GENE-030131-9799                      | 1.408 | 0.041 | si:ch73-162j3.1    | collagen, type IX, alpha 3                                                 |
| A_15_P227431 | ZDB-GENE-030131-2964                      | 1.868 | 0.021 | zgc:63734          | zgc:63734                                                                  |
| A_15_P105258 | ZDB-GENE-050321-1,<br>ZDB-GENE-071004-115 | 3.101 | 0.019 | hsp70l             | heat shock cognate 70-kd protein, like, zgc:174006                         |
| A_15_P171521 | ZDB-GENE-040426-1880                      | 0.566 | 0.002 | myoz2              | myozenin 2                                                                 |
| A_15_P141451 | ZDB-GENE-060929-636                       | 1.584 | 0.032 | zgc:153974         | zgc:153974                                                                 |

|              |                      |       |       |                    |                                                    |
|--------------|----------------------|-------|-------|--------------------|----------------------------------------------------|
| A_15_P594017 | ZDB-GENE-030521-6    | 1.494 | 0.047 | ENSDART00000022870 | si:dkey-95o9.3                                     |
| A_15_P186196 | NA                   | 1.495 | 0.034 | LOC559637          | synaptotagmin-2-like                               |
| A_15_P187386 | NA                   | 0.717 | 0.024 | xylt1              | xylosyltransferase 1                               |
| A_15_P161496 | ZDB-GENE-030131-3568 | 0.455 | 0.002 | klf11a             | Kruppel-like factor 11a                            |
| A_15_P150371 | ZDB-GENE-050913-127  | 0.472 | 0.003 | dao.1              | D-amino-acid oxidase 1                             |
| A_15_P142161 | ZDB-GENE-050208-422  | 1.372 | 0.032 | nrd1               | nardilysin (N-arginine dibasic convertase)         |
| A_15_P172706 | ZDB-GENE-050220-15   | 0.351 | 0.009 | zgc:110527         | zgc:110527                                         |
| A_15_P334244 | ZDB-GENE-081031-93   | 0.603 | 0.01  | TC389656           | si:ch73-299h12.3                                   |
| A_15_P291036 | ZDB-GENE-030131-1009 | 2.431 | 0     | wu:fb55g09         | wu:fb55g09                                         |
| A_15_P115199 | ZDB-GENE-040801-201  | 2.491 | 0     | cldnk              | claudin k                                          |
| A_15_P174511 | ZDB-GENE-050522-195  | 0.549 | 0.001 | zgc:110158         | zgc:110158                                         |
| A_15_P354915 | NA                   | 0.528 | 0.002 | igsf9              | immunoglobulin superfamily, member 9-like          |
| A_15_P102051 | NA                   | 0.553 | 0.026 | TC378600           | mitochondrial carrier triple repeat 1-like         |
| A_15_P203901 | NA                   | 0.486 | 0.025 | LOC572411          | EPH receptor B2-like                               |
| A_15_P161811 | ZDB-GENE-030131-3595 | 1.639 | 0.025 | pofut2             | protein O-fucosyltransferase 2                     |
| A_15_P707891 | ZDB-GENE-040625-79   | 1.81  | 0.015 | zgc:86898          | zgc:86898                                          |
| A_15_P235646 | NA                   | 1.62  | 0.007 | LOC100148110       | RANBP4-like                                        |
| A_15_P148641 | ZDB-GENE-030131-4255 | 1.329 | 0.044 | zswim7             | zinc finger, SWIM-type containing 7                |
| A_15_P108997 | ZDB-GENE-030131-1506 | 0.749 | 0.039 | tia1               | cytotoxic granule-associated RNA binding protein 1 |
| A_15_P194046 | ZDB-GENE-040801-133  | 2.884 | 0.001 | riok3              | RIO kinase 3 (yeast)                               |
| A_15_P118478 | ZDB-GENE-050417-29   | 0.469 | 0     | zgc:110113         | zgc:110113                                         |
| A_15_P200411 | NA                   | 2.648 | 0.005 | ENSDART00000054209 | Cyclin-dependent kinase 4 inhibitor B-like         |
| A_15_P209201 | ZDB-GENE-040718-210  | 3.821 | 0.003 | lyrm1              | LYR motif containing 1                             |
| A_15_P516607 | ZDB-GENE-030131-9684 | 1.554 | 0.04  | TC402915           | kinesin family member 20Bb                         |
| A_15_P175691 | ZDB-GENE-030131-8906 | 1.425 | 0.014 | si:ch211-160d20.3  | si:ch211-160d20.3                                  |
| A_15_P733111 | NA                   | 0.494 | 0.001 | TC384904           | latrophilin 1-like                                 |
| A_15_P186501 | ZDB-GENE-030131-2649 | 1.465 | 0.019 | ENSDART00000083085 | myotubularin related protein 14                    |
| A_15_P686096 | NA                   | 0.385 | 0     | CT679877           | Cancer-up-regulated gene 2 protein-like            |
| A_15_P375840 | NA                   | 1.895 | 0.023 | NP9861855          | urotensin II receptor-like                         |
| A_15_P377990 | ZDB-GENE-040426-1129 | 0.706 | 0.027 | zgc:63474          | zgc:63474                                          |

|              |                                                                                                              |       |       |                    |                                                                                                                 |
|--------------|--------------------------------------------------------------------------------------------------------------|-------|-------|--------------------|-----------------------------------------------------------------------------------------------------------------|
| A_15_P194281 | ZDB-GENE-060421-5255                                                                                         | 3.172 | 0     | zgc:136871         | zgc:136871                                                                                                      |
| A_15_P115905 | ZDB-GENE-070521-6                                                                                            | 1.615 | 0.023 | zgc:163077         | zgc:163077                                                                                                      |
| A_15_P626611 | ZDB-GENE-081022-160                                                                                          | 4.2   | 0.001 | zgc:194878         | zgc:194878                                                                                                      |
| A_15_P104427 | NA                                                                                                           | 0.602 | 0.012 | si:ch211-15i6.4    | si:ch211-15i6.4, hypothetical protein LOC553251                                                                 |
| A_15_P198931 | NA                                                                                                           | 1.575 | 0.026 | LOC793976          | Tctex1 domain containing 2-like                                                                                 |
| A_15_P184266 | ZDB-GENE-041014-325                                                                                          | 1.598 | 0.018 | pla2g4a            | phospholipase A2, group IVA (cytosolic, calcium-dependent)                                                      |
| A_15_P197221 | ZDB-GENE-081107-34                                                                                           | 0.415 | 0.046 | si:ch211-270n8.1   | si:ch211-270n8.1                                                                                                |
| A_15_P206311 | ZDB-GENE-030131-670                                                                                          | 0.476 | 0.036 | ndufa10            | NADH dehydrogenase (ubiquinone) 1 alpha subcomplex, 10                                                          |
| A_15_P479090 | ZDB-GENE-060503-180                                                                                          | 1.685 | 0.017 | atxn10             | ataxin 10                                                                                                       |
| A_15_P109018 | ZDB-GENE-040618-3                                                                                            | 0.45  | 0.023 | rhous              | ras homolog gene family, member Ua                                                                              |
| A_15_P625086 | ZDB-GENE-080204-16                                                                                           | 0.525 | 0.014 | ccdc153            | coiled-coil domain containing 153                                                                               |
| A_15_P100201 | ZDB-GENE-040718-443                                                                                          | 1.762 | 0.006 | gpr137bb           | G protein-coupled receptor 137bb                                                                                |
| A_15_P176162 | ZDB-GENE-060929-520                                                                                          | 1.537 | 0.02  | zgc:152785         | zgc:152785                                                                                                      |
| A_15_P630236 | ZDB-GENE-070912-5                                                                                            | 0.641 | 0.047 | si:ch211-105d4.5   | si:ch211-105d4.5                                                                                                |
| A_15_P631756 | ZDB-GENE-041014-69,<br>ZDB-GENE-041014-99                                                                    | 2.384 | 0.002 | taar12b            | trace amine associated receptor 12b, trace amine associated receptor 12a                                        |
| A_15_P385015 | NA                                                                                                           | 1.455 | 0.015 | TC390341           | hypothetical LOC566028                                                                                          |
| A_15_P576232 | NA                                                                                                           | 1.373 | 0.049 | LOC100151273       | similar to 52 kDa repressor of the inhibitor of the protein kinase                                              |
| A_15_P682871 | NA                                                                                                           | 0.629 | 0.031 | LOC100149056       | pannexin 3-like                                                                                                 |
| A_15_P498672 | NA                                                                                                           | 1.336 | 0.036 | ENSDART00000110922 | novel protein similar to vertebrate protein phosphatase 2 (formerly 2A), regulatory subunit B", alpha (PPP2R3A) |
| A_15_P208826 | ZDB-GENE-050417-164                                                                                          | 0.688 | 0.03  | zgc:112020         | zgc:112020                                                                                                      |
| A_15_P570517 | ZDB-GENE-051010-1                                                                                            | 1.739 | 0.023 | ihha               | Indian hedgehog homolog a                                                                                       |
| A_15_P597992 | ZDB-GENE-030131-8404                                                                                         | 0.494 | 0.001 | trps1              | trichorhinophalangeal syndrome I                                                                                |
| A_15_P140021 | ZDB-GENE-990415-257                                                                                          | 1.498 | 0.008 | mapk12             | mitogen-activated protein kinase 12                                                                             |
| A_15_P570382 | ZDB-GENE-041114-90<br>ZDB-GENE-060918-1,<br>ZDB-GENE-080219-40,<br>ZDB-GENE-071004-53,<br>ZDB-GENE-070822-19 | 1.726 | 0.007 | zgc:103579         | family with sequence similarity 173, member B                                                                   |
| A_15_P623186 | ZDB-GENE-041114-90<br>ZDB-GENE-060918-1,<br>ZDB-GENE-080219-40,<br>ZDB-GENE-071004-53,<br>ZDB-GENE-070822-19 | 0.388 | 0.042 | crygm2d2           | crystallin, gamma M2d2, zgc:173452, crystallin, gamma M2d16, crystallin, gamma M2d12                            |
| A_15_P444545 | NA                                                                                                           | 0.597 | 0.007 | ENSDART00000097289 | tubulin polymerization promoting protein-like                                                                   |
| A_15_P393265 | NA                                                                                                           | 1.489 | 0.02  | TC402676           | hypothetical LOC794202                                                                                          |
| A_15_P212906 | ZDB-GENE-060421-2756                                                                                         | 1.584 | 0.02  | zgc:136827         | BAI1-associated protein 2a                                                                                      |
| A_15_P205176 | ZDB-GENE-030131-9659                                                                                         | 0.536 | 0.005 | si:ch211-132p20.4  | si:ch211-132p20.4                                                                                               |

|              |                      |       |       |                    |                                                                                                         |
|--------------|----------------------|-------|-------|--------------------|---------------------------------------------------------------------------------------------------------|
| A_15_P189951 | NA                   | 1.503 | 0.029 | ENSDART00000040370 | novel protein similar to PIM oncogene family                                                            |
| A_15_P254861 | NA                   | 2.066 | 0.001 | LOC100149388       | inositol 1,4,5-trisphosphate receptor type 2-like,<br>inositol 1,4,5-triphosphate receptor, type 1-like |
| A_15_P152231 | ZDB-GENE-041010-93   | 0.673 | 0.028 | dut                | dUTP pyrophosphatase                                                                                    |
| A_15_P720219 | ZDB-GENE-040426-2381 | 0.564 | 0.014 | zgc:77651          | zgc:77651                                                                                               |
| A_15_P243741 | ZDB-GENE-030616-83   | 2.68  | 0     | LOC568104          | si:rp71-79p20.2                                                                                         |
| A_15_P232526 | NA                   | 0.63  | 0.013 | EH503223           | hypothetical LOC100151433                                                                               |
| A_15_P141821 | ZDB-GENE-040801-130  | 1.844 | 0.035 | mett10d            | methyltransferase 10 domain containing                                                                  |
| A_15_P101564 | ZDB-GENE-060810-169  | 1.782 | 0.004 | zgc:136449         | zgc:136449                                                                                              |
| A_15_P112009 | ZDB-GENE-040801-168  | 1.401 | 0.034 | mrp15              | mitochondrial ribosomal protein L15                                                                     |
| A_15_P256891 | NA                   | 1.681 | 0.008 | EH455016           | preprogalanin 1B-like                                                                                   |
| A_15_P490412 | ZDB-GENE-090908-1    | 1.442 | 0.042 | atxn1l             | ataxin 1-like                                                                                           |
| A_15_P372825 | ZDB-GENE-081016-1    | 0.783 | 0.047 | appl1              | adaptor protein, phosphotyrosine interaction, PH domain and<br>leucine zipper containing 1              |
| A_15_P112525 | ZDB-GENE-991111-3    | 4.151 | 0     | igf2a              | insulin-like growth factor 2a                                                                           |
| A_15_P208976 | ZDB-GENE-040426-2519 | 1.643 | 0.004 | zgc:85909          | zgc:85909                                                                                               |
| A_15_P102304 | ZDB-GENE-030903-2    | 1.34  | 0.05  | cdk8               | cyclin-dependent kinase 8                                                                               |
| A_15_P729271 | ZDB-GENE-061215-33   | 2.505 | 0     | zgc:158285         | zgc:158285                                                                                              |
| A_15_P765516 | NA                   | 0.54  | 0.039 | LOC796447          | hypothetical protein LOC796447                                                                          |
| A_15_P499147 | NA                   | 1.77  | 0.016 | TC402358           | histone cluster 1, H2bc-like                                                                            |
| A_15_P507837 | ZDB-GENE-090312-142  | 1.514 | 0.011 | ENSDART00000077916 | si:ch211-12d10.5                                                                                        |
| A_15_P180396 | ZDB-GENE-060518-1    | 1.487 | 0.021 | bxdc2              | brix domain containing 2                                                                                |
| A_15_P113676 | ZDB-GENE-051120-141  | 1.386 | 0.03  | trmt6              | tRNA methyltransferase 6 homolog (S. cerevisiae)                                                        |
| A_15_P173121 | ZDB-GENE-060503-468  | 0.525 | 0.028 | si:dkeyp-92c9.2    | si:dkeyp-92c9.2                                                                                         |
| A_15_P239346 | NA                   | 1.842 | 0.001 | LOC100150502       | intermediate filament family orphan-like                                                                |
| A_15_P112908 | ZDB-GENE-050522-267  | 1.714 | 0.002 | morn5              | MORN repeat containing 5                                                                                |
| A_15_P205956 | ZDB-GENE-030131-6225 | 1.433 | 0.038 | si:ch211-201b11.2  | si:ch211-201b11.2                                                                                       |
| A_15_P141456 | ZDB-GENE-061031-5    | 3.785 | 0.001 | il17c              | interleukin 17c                                                                                         |
| A_15_P176281 | ZDB-GENE-050417-177  | 1.422 | 0.026 | npepl1             | aminopeptidase-like 1                                                                                   |
| A_15_P272401 | NA                   | 3.409 | 0.032 | TC391063           | hypothetical LOC565454                                                                                  |
| A_15_P282946 | ZDB-GENE-040927-29   | 1.631 | 0.021 | bcl9l              | B-cell CLL/lymphoma 9-like                                                                              |
| A_15_P104700 | ZDB-GENE-040712-5    | 0.708 | 0.021 | irx6a              | iroquois homeobox protein 6a                                                                            |

|              |                                                                  |       |       |                    |                                                                                                                                      |
|--------------|------------------------------------------------------------------|-------|-------|--------------------|--------------------------------------------------------------------------------------------------------------------------------------|
| A_15_P240356 | NA                                                               | 1.374 | 0.03  | LOC565523          | hypothetical LOC565523                                                                                                               |
| A_15_P258446 | NA                                                               | 0.575 | 0.008 | LOC568110          | wingless-type MMTV integration site family, member 7A-like                                                                           |
| A_15_P668791 | ZDB-GENE-070912-387                                              | 1.718 | 0.013 | si:dkey-174k18.1   | si:dkey-174k18.1                                                                                                                     |
| A_15_P621034 | NA                                                               | 0.592 | 0.005 | si:ch211-193k19.2  | si:ch211-193k19.2, hypothetical LOC794143                                                                                            |
| A_15_P158771 | NA                                                               | 1.539 | 0.018 | LOC792539          | Ras association (RalGDS/AF-6) domain family member 5-like                                                                            |
| A_15_P169336 | ZDB-GENE-040718-223                                              | 2.128 | 0.004 | ar16ip5b           | ADP-ribosylation factor-like 6 interacting protein 5b                                                                                |
| A_15_P118474 | NA                                                               | 0.575 | 0.004 | LOC556422          | mitochondrial carrier triple repeat 1-like                                                                                           |
| A_15_P242606 | NA                                                               | 1.666 | 0.014 | LOC568715          | Ras and Rab interactor 2-like                                                                                                        |
| A_15_P119080 | ZDB-GENE-040426-2724                                             | 1.812 | 0.012 | pkfkb3             | 6-phosphofructo-2-kinase/fructose-2,6-biphosphatase 3                                                                                |
| A_15_P190391 | NA                                                               | 1.467 | 0.029 | LOC557266          | Transcriptional activator protein Pur-alpha-like                                                                                     |
| A_15_P287009 | NA                                                               | 1.39  | 0.016 | CA496760           | shisa homolog 2-like                                                                                                                 |
| A_15_P204301 | ZDB-GENE-050913-108                                              | 0.696 | 0.019 | acbd7              | acyl-Coenzyme A binding domain containing 7 novel protein similar to vertebrate DnaJ (Hsp40) homolog, subfamily B, member 5 (DNAJB5) |
| A_15_P153871 | NA                                                               | 1.526 | 0.024 | LOC569466          |                                                                                                                                      |
| A_15_P628166 | ZDB-GENE-021219-1                                                | 1.436 | 0.018 | c1orf109           | c1orf109 homolog (H. sapiens)                                                                                                        |
| A_15_P657996 | ZDB-GENE-050208-20                                               | 1.388 | 0.026 | ENSDART00000112510 | si:ch211-254d18.3                                                                                                                    |
| A_15_P106484 | ZDB-GENE-030131-985                                              | 0.558 | 0.025 | htatip             | HIV-1 tat interactive protein, homolog (human)                                                                                       |
| A_15_P153246 | ZDB-GENE-050522-256                                              | 2.007 | 0.003 | nip7               | nuclear import 7 homolog (S. cerevisiae)                                                                                             |
| A_15_P492587 | NA                                                               | 0.503 | 0.013 | TC430177           | sodium- and chloride-dependent GABA transporter 3-like                                                                               |
| A_15_P109981 | ZDB-GENE-040426-2924                                             | 2.161 | 0.001 | sesn3              | sestrin 3                                                                                                                            |
| A_15_P515357 | ZDB-GENE-081031-84                                               | 1.949 | 0.003 | LOC570966          | si:ch73-299h12.1                                                                                                                     |
| A_15_P115133 | ZDB-GENE-070410-35                                               | 1.577 | 0.031 | zgc:162204         | zgc:162204                                                                                                                           |
| A_15_P368301 | NA                                                               | 2.622 | 0     | ENSDART00000115126 | CG18596-like                                                                                                                         |
| A_15_P626641 | ZDB-GENE-070822-12,<br>ZDB-GENE-030131-271,<br>ZDB-GENE-080930-1 | 1.445 | 0.031 | smyhc2             | slow myosin heavy chain 2, slow myosin heavy chain 1 , slow myosin heavy chain 3                                                     |
| A_15_P167636 | NA                                                               | 0.652 | 0.027 | slc12a1            | Na/K/Cl cotransporter                                                                                                                |
| A_15_P114845 | ZDB-GENE-060825-47                                               | 1.482 | 0.009 | zgc:153708         | zgc:153708                                                                                                                           |
| A_15_P117824 | ZDB-GENE-030131-5540                                             | 1.745 | 0.002 | qrsl1              | glutamyl-tRNA synthase (glutamine-hydrolyzing)-like 1                                                                                |
| A_15_P113833 | NA                                                               | 1.78  | 0.002 | LOC793804          | augurin B                                                                                                                            |
| A_15_P157466 | ZDB-GENE-050522-189                                              | 1.472 | 0.038 | ENSDART00000057865 | zgc:112367                                                                                                                           |
| A_15_P569807 | NA                                                               | 0.727 | 0.047 | LOC570552          | novel asparaginase protein                                                                                                           |

|              |                                          |       |       |                    |                                                                      |
|--------------|------------------------------------------|-------|-------|--------------------|----------------------------------------------------------------------|
| A_15_P381365 | NA                                       | 0.494 | 0.002 | LOC799479          | G protein-coupled receptor 97-like                                   |
| A_15_P150691 | ZDB-GENE-061030-1                        | 1.631 | 0.014 | cyp2j23            | cytochrome P450, family 2, subfamily J, polypeptide 23               |
| A_15_P598132 | ZDB-GENE-030131-230                      | 2.16  | 0.023 | si:ch211-241e1.3   | si:ch211-241e1.3                                                     |
| A_15_P205621 | ZDB-GENE-051023-10                       | 1.821 | 0.003 | zgc:123336         | nucleotide binding protein 2 (MinD homolog, E. coli)                 |
| A_15_P771221 | ZDB-GENE-080219-1                        | 1.475 | 0.032 | TC377194           | poly (ADP-ribose) polymerase family, member 6b                       |
| A_15_P620638 | ZDB-GENE-081022-160                      | 5.101 | 0.005 | rt                 | reverse transcriptase, zgc:194878                                    |
| A_15_P153476 | ZDB-GENE-040426-1600                     | 0.614 | 0.005 | mlh1               | mutL homolog 1, colon cancer, nonpolyposis type 2 (E. coli)          |
| A_15_P164271 | ZDB-GENE-050913-32                       | 1.753 | 0.005 | noxa1              | NADPH oxidase activator 1                                            |
| A_15_P759526 | ZDB-GENE-080218-18,<br>ZDB-GENE-090610-2 | 3.663 | 0.003 | zgc:172260         | zgc:172260, zgc:172109                                               |
| A_15_P113088 | ZDB-GENE-030131-2935                     | 2.212 | 0.001 | igf2b              | insulin-like growth factor 2b                                        |
| A_15_P265151 | NA                                       | 2.047 | 0.004 | CN319141           | solute carrier family 22 (organic cation transporter), member 5-like |
| A_15_P162046 | ZDB-GENE-040426-1490                     | 1.834 | 0.008 | zgc:65960          | zgc:65960                                                            |
| A_15_P620681 | ZDB-GENE-030131-4905                     | 3.076 | 0     | lgals111           | lectin, galactoside-binding, soluble, 1 (galectin 1)-like 1          |
| A_15_P172636 | ZDB-GENE-050522-326                      | 1.936 | 0.002 | zgc:112399         | zgc:112399                                                           |
| A_15_P501502 | NA                                       | 1.492 | 0.007 | LOC100001676       | novel protein similar to vertebrate carbohydrate kinase-like (CARKL) |
| A_15_P112467 | ZDB-GENE-010412-1                        | 1.727 | 0.011 | six2.1             | sine oculis-related homeobox 2a                                      |
| A_15_P173946 | ZDB-GENE-041210-91                       | 1.613 | 0.017 | si:dkey-21h14.2    | si:dkey-21h14.2                                                      |
| A_15_P238764 | NA                                       | 1.939 | 0.036 | LOC100006827       | novel protein similar to vertebrate pim oncogene family              |
| A_15_P580737 | ZDB-GENE-040426-793                      | 3.644 | 0     | rasl11b            | RAS-like, family 11, member B                                        |
| A_15_P245071 | ZDB-GENE-051030-21                       | 1.9   | 0.015 | shox               | short stature homeobox                                               |
| A_15_P208136 | ZDB-GENE-041014-54                       | 0.575 | 0.021 | taar12h            | trace amine associated receptor 12h                                  |
| A_15_P262761 | ZDB-GENE-071015-1                        | 1.664 | 0.014 | TC391562           | Rho GTPase activating protein 20                                     |
| A_15_P111211 | ZDB-GENE-050522-30                       | 1.767 | 0.011 | zgc:110652         | zgc:110652                                                           |
| A_15_P219626 | ZDB-GENE-030131-1684                     | 0.688 | 0.019 | si:ch211-281g13.2  | novel protein similar to vertebrate STE20-like kinase (SLK)          |
| A_15_P100777 | ZDB-GENE-041001-132                      | 1.533 | 0.036 | si:dkey-25e12.3    | si:dkey-25e12.3                                                      |
| A_15_P312151 | ZDB-GENE-050309-209                      | 2.657 | 0.007 | si:ch211-253b1.6   | si:ch211-253b1.6                                                     |
| A_15_P412285 | NA                                       | 0.406 | 0.028 | ENSDART00000035742 | Cytochrome b561-like                                                 |
| A_15_P350635 | ZDB-GENE-090313-357                      | 1.465 | 0.021 | TC383441           | si:dkey-98j1.4                                                       |
| A_15_P117121 | ZDB-GENE-081104-519                      | 1.811 | 0.017 | ENSDART00000045588 | si:dkeyp-68f9.9                                                      |
| A_15_P182731 | ZDB-GENE-041111-169                      | 1.53  | 0.05  | ENSDART00000086717 | im:7142837                                                           |

|              |                                            |       |       |                    |                                                                                      |
|--------------|--------------------------------------------|-------|-------|--------------------|--------------------------------------------------------------------------------------|
| A_15_P178771 | ZDB-GENE-090311-45                         | 1.86  | 0.007 | si:dkey-256k13.1   | si:dkey-256k13.1                                                                     |
| A_15_P269971 | ZDB-GENE-080220-29                         | 1.613 | 0.034 | anxa5a             | annexin A5a                                                                          |
| A_15_P670036 | ZDB-GENE-030131-8091                       | 2.709 | 0     | TC417879           | si:ch1073-183g13.2                                                                   |
| A_15_P191151 | ZDB-GENE-040426-2311                       | 0.585 | 0.026 | aga                | aspartylglucosaminidase                                                              |
| A_15_P256406 | NA                                         | 1.508 | 0.011 | LOC568864          | hypothetical LOC568864                                                               |
| A_15_P105222 | ZDB-GENE-040704-53                         | 1.554 | 0.017 | spag6              | sperm associated antigen 6                                                           |
| A_15_P140006 | ZDB-GENE-050201-4                          | 1.918 | 0.035 | fgf23              | fibroblast growth factor 23                                                          |
| A_15_P576757 | ZDB-GENE-030131-7110                       | 1.446 | 0.022 | ENSDART00000110084 | Ras association (RalGDS/AF-6) domain family (N-terminal) member 10b                  |
| A_15_P626116 | ZDB-GENE-040426-918                        | 1.662 | 0.004 | lpp                | LIM domain containing preferred translocation partner in lipoma                      |
| A_15_P490882 | NA                                         | 2.042 | 0     | LOC560297          | novel protein similar to vertebrate phosphoglucomutase 5 (PGM5)                      |
| A_15_P367265 | ZDB-GENE-030131-6989                       | 1.681 | 0.004 | ebna1bp2l          | EBNA1 binding protein 2-like                                                         |
| A_15_P137536 | ZDB-GENE-030404-1                          | 0.526 | 0.002 | mibp               | muscle-specific beta 1 integrin binding protein                                      |
| A_15_P140756 | ZDB-GENE-070822-17,<br>ZDB-GENE-040426-854 | 1.438 | 0.046 | zgc:171719         | zgc:171719, tropomyosin 1 (alpha)                                                    |
| A_15_P190976 | NA                                         | 1.481 | 0.041 | LOC558202          | Transmembrane 9 superfamily member 2-like                                            |
| A_15_P141546 | ZDB-GENE-060929-88                         | 1.719 | 0.008 | zgc:153444         | zgc:153444                                                                           |
| A_15_P207906 | ZDB-GENE-040704-14                         | 1.404 | 0.047 | tha1               | threonine aldolase 1                                                                 |
| A_15_P289896 | ZDB-GENE-080829-11                         | 1.479 | 0.034 | tmem176l.1         | Membrane-spanning 4-domains subfamily A member 8A-like, transmembrane protein 176l.1 |
| A_15_P104398 | ZDB-GENE-040809-1                          | 0.565 | 0.003 | atm                | ataxia telangiectasia mutated                                                        |
| A_15_P170541 | ZDB-GENE-090312-92                         | 1.389 | 0.047 | si:dkey-28b4.5     | si:dkey-28b4.5                                                                       |
| A_15_P102261 | ZDB-GENE-040808-37                         | 1.818 | 0.013 | ncaldb             | neurocalcin delta b                                                                  |
| A_15_P624181 | ZDB-GENE-071004-53                         | 0.229 | 0.01  | crygm2d16          | crystallin, gamma M2d16                                                              |
| A_15_P100571 | ZDB-GENE-050320-149                        | 1.942 | 0.001 | nmd3               | NMD3 homolog (S. cerevisiae)                                                         |
| A_15_P235161 | NA                                         | 1.829 | 0.004 | LOC100151400       | similar to C3 and PZP-like, alpha-2-macroglobulin domain containing 8                |
| A_15_P196376 | ZDB-GENE-050517-23                         | 1.589 | 0.021 | abcc9              | ATP-binding cassette, sub-family C (CFTR/MRP), member 9                              |
| A_15_P152266 | ZDB-GENE-050904-3                          | 0.59  | 0.014 | sla1               | Src-like-adaptor 1                                                                   |
| A_15_P772476 | ZDB-GENE-030131-3055                       | 1.429 | 0.031 | usp19              | ubiquitin specific peptidase 19                                                      |
| A_15_P317986 | NA                                         | 1.733 | 0.016 | LOC798792          | CD79a-like                                                                           |
| A_15_P156506 | ZDB-GENE-071004-78                         | 1.661 | 0.006 | plcd1a             | phospholipase C, delta 1a                                                            |
| A_15_P631364 | NA                                         | 0.577 | 0.03  | LOC100149066       | hairy-related 4.2-like, hairy-related 4.2, hairy-related 4.1                         |
| A_15_P166591 | NA                                         | 1.826 | 0.017 | LOC568219          | membrane guanylyl cyclase-like                                                       |



|              |                                               |       |       |                    |                                                                                        |
|--------------|-----------------------------------------------|-------|-------|--------------------|----------------------------------------------------------------------------------------|
| A_15_P134804 | ZDB-GENE-030131-6989,<br>ZDB-GENE-040426-2647 | 1.818 | 0.004 | ebna1bp2l          | EBNA1 binding protein 2-like, SAFB-like, transcription modulator                       |
| A_15_P687158 | NA                                            | 1.524 | 0.021 | LOC564264          | predicted protein-like                                                                 |
| A_15_P170621 | ZDB-GENE-040426-960                           | 1.436 | 0.044 | rbm28              | RNA binding motif protein 28                                                           |
| A_15_P164876 | NA                                            | 2.495 | 0.001 | TC367976           | hypothetical LOC555689                                                                 |
| A_15_P113610 | ZDB-GENE-050417-82                            | 2.899 | 0.002 | ptcd2              | pentatricopeptide repeat domain 2                                                      |
| A_15_P138916 | NA                                            | 2.131 | 0.001 | LOC100149443       | novel protein containing lectin C-type domains                                         |
| A_15_P682751 | NA                                            | 1.984 | 0.036 | LOC100003937       | ADAM metallopeptidase with thrombospondin type 1 motif, 3 proprotein-like              |
| A_15_P175696 | ZDB-GENE-040324-1                             | 1.429 | 0.048 | hcr1               | hypocretin (orexin) neuropeptide precursor                                             |
| A_15_P519792 | NA                                            | 1.763 | 0.035 | LOC100007758       | novel protein similar to vertebrate SLIT and NTRK-like family, member 3 (SLITRK3)      |
| A_15_P467190 | NA                                            | 0.438 | 0.002 | BC150224           | hypothetical LOC799971                                                                 |
| A_15_P191961 | ZDB-GENE-040724-143                           | 1.9   | 0.006 | si:ch211-13n20.2   | nidogen 2b (osteonidogen)                                                              |
| A_15_P103560 | ZDB-GENE-040426-2242                          | 0.244 | 0     | zgc:77082          | zgc:77082                                                                              |
| A_15_P211706 | ZDB-GENE-030102-2                             | 1.503 | 0.013 | zcchc7l            | Zcchc7l protein-like, zinc finger, CCHC domain containing 7- like                      |
| A_15_P186236 | NA                                            | 1.454 | 0.031 | LOC100003543       | SAM pointed domain containing ets transcription factor-like                            |
| A_15_P545297 | ZDB-GENE-090313-208                           | 1.501 | 0.031 | si:dkey-188i13.10  | si:dkey-188i13.10                                                                      |
| A_15_P285466 | ZDB-GENE-040426-1294                          | 1.773 | 0.006 | srfl               | serum response factor like                                                             |
| A_15_P766771 | NA                                            | 1.81  | 0.005 | zgc:173703         | zgc:173703, similar to zinc finger protein 569                                         |
| A_15_P186156 | ZDB-GENE-060810-113                           | 1.472 | 0.028 | stx16              | syntaxin 16                                                                            |
| A_15_P268026 | NA                                            | 1.454 | 0.038 | LOC795408          | lethal (2) k05819-like                                                                 |
| A_15_P109600 | ZDB-GENE-021120-1                             | 3.238 | 0.002 | ENSDART00000029125 | complement component 7                                                                 |
| A_15_P151641 | ZDB-GENE-030131-3513                          | 3.175 | 0     | mthfsd             | methenyltetrahydrofolate synthetase domain containing                                  |
| A_15_P198351 | ZDB-GENE-010724-3                             | 1.444 | 0.041 | sec22ba            | SEC22 vesicle trafficking protein homolog B (S. cerevisiae), a                         |
| A_15_P392575 | ZDB-GENE-030131-8286                          | 4.987 | 0     | TC384981           | TATA box binding protein (Tbp)-associated factor, RNA polymerase I, C-like, wu:fj64h06 |
| A_15_P153891 | ZDB-GENE-010502-2                             | 2.863 | 0     | psma6b             | proteasome (prosome, macropain) subunit, alpha type, 6b                                |
| A_15_P201521 | ZDB-GENE-070912-622                           | 1.824 | 0.005 | si:dkey-9g20.2     | transmembrane protein with EGF-like and two follistatin-like domains 2                 |
| A_15_P100143 | ZDB-GENE-060825-212                           | 1.524 | 0.013 | zgc:153251         | zgc:153251                                                                             |
| A_15_P192286 | ZDB-GENE-041001-138                           | 1.503 | 0.037 | ENSDART00000004209 | midasin homolog (yeast)                                                                |
| A_15_P195526 | ZDB-GENE-070112-272                           | 1.699 | 0.009 | ptpmt1             | protein tyrosine phosphatase, mitochondrial 1                                          |
| A_15_P589247 | ZDB-GENE-080204-110                           | 1.52  | 0.03  | zgc:172271         | zgc:172271                                                                             |
